# Supplementary material for: Total synthesis of antimalarial diterpenoid (+)-kalihinol A
Source: Royal Society of Chemistry journal article supplement (doi:10.1039/c1cc16468f), 2011-11-21

## Electronic Supplementary Information

### Total synthesis of antimalarial diterpenoid (+)-kalihinol A

Hiroaki Miyaoka\*, Yasunori Abe, Nobuaki Sekiya,  
Hidemichi Mitome and Etsuko Kawashima

*School of Pharmacy, Tokyo University of Pharmacy and Life Sciences,  
1432-1 Horinouchi, Hachioji, Tokyo 192-0392, Japan*  
Fax: +81 42 676 3073; Tel: +81 42 676 3080; E-mail: [miyaokah@toyaku.ac.jp](mailto:miyaokah@toyaku.ac.jp)

#### Contents

|                      |       |
|----------------------|-------|
| Experimental Section | 2-14  |
| X-Ray Crystal data   | 15-16 |
| NMR spectra          | 17-48 |

## Experimental Section

### General

Optical rotations were measured using a Jasco P-1030 polarimeter. Melting points (mp) were measured using a Yazawa melting point apparatus BY-2 and are uncorrected. IR spectra were recorded using a Jasco FT-IR/620 spectrometer. UV spectra were recorded using a Jasco V-550 spectrophotometer.  $^1\text{H}$  and  $^{13}\text{C}$  NMR spectra were recorded on a Bruker DRX-400 or Bruker Biospin AV-600 spectrometer. Chemical shifts are given on the  $\delta$  (ppm) scale using tetramethylsilane (TMS) as the internal standard (s, singlet; d, doublet; t, triplet; q, quartet; quint, quintet; m, multiplet; br, broad). High resolution ESIMS (HRESIMS) spectra were obtained using a Micromass LCT spectrometer. Elemental analysis data were obtained using an Elemental Vavio EL. Flash column chromatography was performed using Kanto Chemical Silica Gel 60N (spherical, neutral) 40-50  $\mu\text{m}$ .

**(2R,3R,6R)-6-(tert-Butyldiphenylsilyloxy)-2,3-epoxy-3,7-dimethyloct-7-en-1-ol (3).** To a solution of diol **2** (6.20 g, 36.5 mmol) in  $\text{CH}_2\text{ClCH}_2\text{Cl}$  (95 mL) were added  $\text{Et}_3\text{N}$  (7.63 mL, 54.8 mmol), DMAP (450 mg, 3.65 mmol) and TBSCl (6.05 g, 40.1 mmol) at r.t. After stirring for 1 hr at an ambient temperature, the mixture was diluted with  $\text{Et}_2\text{O}$ , washed with  $\text{H}_2\text{O}$  and brine, and then dried over  $\text{MgSO}_4$ . Removal of the solvent gave a residue which was then filtered through silica gel pad using hexane/AcOEt = 6:1 as a eluent. The filtrate was concentrated to give crude TBS ether. The crude TBS ether was used next reaction without further purification.

To a solution of the above crude TBS ether in DMF (37 mL) were added imidazole (4.07 g, 73.0 mmol) and TBDPSCl (14.3 g, 54.8 mmol) at r.t. After stirring for 5 hr at an ambient temperature, the mixture was diluted with  $\text{Et}_2\text{O}$ , washed with  $\text{H}_2\text{O}$  and brine, and then dried over  $\text{MgSO}_4$ . Removal of the solvent gave a residue which was then filtered through silica gel pad using hexane/AcOEt = 13:1 as a eluent. The filtrate was concentrated to give crude TBDPS ether. The crude TBDPS ether was used next reaction without further purification.

To a solution of the above crude TBDPS ether in MeOH (360 mL) was added PPTS (3.60 g, 14.3 mmol) at r.t. After stirring for 9 hr at an ambient temperature, the mixture was concentrated under reduced pressure to give a residue which was then purified by silica gel column chromatography (hexane/AcOEt = 7 : 2) to generate allylic alcohol (12.4 g, 83% yield, three steps) as a colorless oil.  $[\alpha]_{\text{D}}^{28}$  -23.5 (*c* 0.89,  $\text{CHCl}_3$ ); IR (neat) 3333, 2931  $\text{cm}^{-1}$ ;  $^1\text{H}$  NMR (400 MHz,  $\text{CDCl}_3$ )  $\delta$  ppm: 7.70-7.63 (4H, m), 7.37 (6H, m), 5.23 (1H, dt,  $J = 6.9, 1.2$  Hz), 4.77 (1H, d,  $J = 1.5$  Hz), 4.75 (1H, d,  $J = 0.7$  Hz), 4.09 (1H, t,  $J = 6.1$  Hz), 4.05 (2H, d,  $J = 6.9$  Hz), 1.78 (2H, m), 1.70 (3H, s), 1.56 (2H, m), 1.50 (3H, s), 1.07 (9H, s);  $^{13}\text{C}$ -NMR (75 MHz,  $\text{CDCl}_3$ )  $\delta$ : 145.7, 139.5, 135.7, 135.7, 134.4, 133.7, 129.3, 129.3, 127.3, 127.2, 122.8, 111.7, 76.9, 59.4, 34.7, 33.4, 27.2, 19.6, 17.4, 16.4; EIMS  $m/z$ : 351 ( $\text{M}^+ - ^t\text{Bu}$ , 9), 135 (100); HREIMS  $m/z$ : 351.1798 (Calcd for  $\text{C}_{22}\text{H}_{27}\text{O}_2\text{Si}$ :  $\text{M}^+ - ^t\text{Bu}$ , 351.1780).

To a cold (-20  $^\circ\text{C}$ ) suspension of 4A molecular sieves (12 g) in  $\text{CH}_2\text{Cl}_2$  (53.0 mL) were added D-(-)-DET (230 mg, 1.10 mmol),  $\text{Ti}(\text{OiPr})_4$  (220 mg, 0.790 mmol) and TBHP (16.8 mL, 31.6 mmol,

2.52 M in CH<sub>2</sub>Cl<sub>2</sub> solution). After stirring for 1 hr at the same temperature, a solution of the above allylic alcohol (6.45 g, 15.8 mol) in CH<sub>2</sub>Cl<sub>2</sub> (10.0 mL) was added over 30 min. After stirring at -20 °C for 30 min, NaOH (5.0 mL, 30% in saturated aqueous NaCl) was added. The mixture was diluted with Et<sub>2</sub>O, warmed to r.t. and stirred for 10 min. MgSO<sub>4</sub> (69 g) and celite (10 g) were then added and after stirring for 15 min, the mixture was filtered through a celite pad and the filtrate was concentrated under reduced pressure. The residue was purified by silica gel column chromatography (hexane/AcOEt = 5 : 2) to give epoxyalcohol **3** (6.37 g, 95% yield) as a colorless oil. [ $\alpha$ ]<sub>D</sub><sup>29</sup> -19.7 (*c* 0.97, CHCl<sub>3</sub>); IR (neat) cm<sup>-1</sup>: 3418, 2932; <sup>1</sup>H-NMR (400 MHz, CDCl<sub>3</sub>)  $\delta$ : 7.70-7.61 (4H, m), 7.38 (6H, m), 4.79 (1H, d, *J* = 0.6 Hz), 4.77 (1H, d, *J* = 1.3 Hz), 4.11 (1H, t, *J* = 5.5 Hz), 3.75 (1H, dd, *J* = 12.0, 4.4 Hz), 3.61 (1H, dd, *J* = 12.0, 6.6 Hz), 2.79 (1H, dd, *J* = 6.6, 4.4 Hz), 1.66 (3H, s), 1.50 (2H, m), 1.31 (2H, m), 1.12 (3H, s), 1.07 (9H, s); <sup>13</sup>C-NMR 100 MHz, CDCl<sub>3</sub>)  $\delta$ : 145.6, 135.9, 135.9, 134.5, 133.8, 129.6, 129.5, 127.5, 127.4, 111.9, 76.6, 62.6, 61.3, 61.1, 33.3, 30.3, 27.0, 19.3, 17.5, 17.2, 16.7.; EIMS *m/z*: 367 (M<sup>+</sup>-<sup>t</sup>Bu, 2), 199 (100); HREIMS *m/z*: 367.1741 (Calcd for C<sub>22</sub>H<sub>27</sub>O<sub>2</sub>Si: M<sup>+</sup>-<sup>t</sup>Bu, 367.1729).

**(2S,3R,6R)-2-{3-(Benzyloxy)propyl}-6-(tert-butyldiphenylsilyloxy)-3,7-dimethyloct-7-ene-1,3-diol (5).** Grignard reagent **4** (2.70 ml, 1.89 mmol, 0.7 M in THF) was added dropwise to CuI (7.2 mg, 37.7  $\mu$ mol) at -78 °C under Ar atmosphere. After stirring for 30 min at the same temperature, a solution of epoxyalcohol **3** (160 mg, 377  $\mu$ mol) in THF (3.07 mL) was added. The mixture was warmed to r.t. After stirring for 3 hr, the reaction mixture was diluted with Et<sub>2</sub>O, washed with sat. NH<sub>4</sub>Cl aqueous solution, H<sub>2</sub>O and brine, and then dried over MgSO<sub>4</sub>. Removal of the solvent gave a residue, which was purified by silica gel column chromatography (hexane : AcOEt = 5 : 2) to generate diol **5** (240 mg, 94% yield) as a colorless oil. [ $\alpha$ ]<sub>D</sub><sup>28</sup> -8.4 (*c* 0.91, CHCl<sub>3</sub>); IR (neat) cm<sup>-1</sup>: 3357, 2931; <sup>1</sup>H-NMR (400 MHz, CDCl<sub>3</sub>)  $\delta$ : 7.70-7.62 (4H, m), 7.43-7.25 (11H, m), 4.82 (1H, d, *J* = 0.6 Hz), 4.79 (1H, d, *J* = 1.3 Hz), 4.47 (2H, s), 4.13 (1H, t, *J* = 5.7 Hz), 3.68 (2H, m), 3.42 (2H, m), 1.68 (2H, m), 1.67 (3H, s), 1.48 (4H, m), 1.34-1.22 (2H, m), 1.07 (9H, s), 0.99 (3H, s); <sup>13</sup>C-NMR (100 MHz, CDCl<sub>3</sub>)  $\delta$ : 145.9, 138.4, 136.0, 135.9, 134.6, 133.8, 129.6, 129.6, 128.4, 127.6, 127.5, 127.4, 111.8, 77.1, 76.4, 72.9, 70.3, 63.0, 46.6, 36.2, 28.6, 28.4, 27.0, 23.5, 23.3, 19.3, 17.6; ESIMS *m/z*: 575 (100); HRESIMS *m/z*: 575.3531 (Calcd for C<sub>36</sub>H<sub>50</sub>O<sub>4</sub>Si: M<sup>+</sup>+H, 575.3557); *Anal.*: Calcd for C<sub>36</sub>H<sub>50</sub>O<sub>4</sub>Si: C, 75.22; H, 8.77. Found: C, 74.92; H, 8.83.

**(2S,3R,6R)-3-Acetoxy-2-(3-benzyloxypropyl)-6-chloro-3,7-dimethyl-7-octenyl acetate (6).** To a solution of diol **5** (20.0 mg, 34.8  $\mu$ mol) in pyridine (35  $\mu$ L) was added Ac<sub>2</sub>O (21.3 mg, 209  $\mu$ mol) at r.t. After stirring for 3 hr at an ambient temperature, DMAP (0.4 mg, 3.5  $\mu$ mol) was added and stirred at 60 °C for 24 hr. The reaction mixture was concentrated under reduced pressure to give a residue which was then purified by silica gel column chromatography (hexane/AcOEt = 4 : 1) to generate diacetate (18.8 mg, 82% yield) as a colorless oil. [ $\alpha$ ]<sub>D</sub><sup>22</sup> -17.4 (*c* 0.81, CHCl<sub>3</sub>); IR (neat) cm<sup>-1</sup>: 2932, 1738; <sup>1</sup>H-NMR (400 MHz, CDCl<sub>3</sub>)  $\delta$ : 7.69-7.61 (4H, m), 7.42-7.26 (11H, m), 4.77 (2H, s), 4.47 (2H, s), 4.14 (1H, dd, *J* = 11.6, 4.8 Hz), 4.10 (1H, m), 4.00 (1H, dd, *J* = 11.7, 4.7 Hz), 3.41

(2H, m), 2.40 (1H, m), 1.99 (3H, s), 1.87 (3H, s), 1.71 (2H, m), 1.67 (3H, s), 1.55-1.33 (4H, m), 1.30-1.20 (2H, m), 1.24 (3H, s), 1.07 (9H, s);  $^{13}\text{C-NMR}$  (100 MHz,  $\text{CDCl}_3$ )  $\delta$ : 170.9, 170.0, 145.8, 138.6, 135.9, 134.6, 134.0, 129.6, 128.3, 127.6, 127.4, 111.9, 85.9, 72.8, 70.2, 64.0, 43.7, 31.1, 28.7, 28.1, 27.0, 23.9, 22.2, 21.4, 21.0, 19.3, 17.2; EIMS  $m/z$ : 599 ( $\text{M}^+\text{-OAc}$ , 24), 541 (100); HREIMS  $m/z$ : 599.3548 (Calcd for  $\text{C}_{38}\text{H}_{51}\text{O}_4\text{Si}$ :  $\text{M}^+\text{-OAc}$ , 599.3557).

TBAF (1.0 M in THF, 8.64 mL, 8.64 mmol) and AcOH (520 mg, 8.64 mmol) were added to the above diacetate (570 mg, 865  $\mu\text{mol}$ ). The mixture stirred at 60 °C for 48 hr. The reaction mixture was diluted with  $\text{Et}_2\text{O}$ , washed with sat.  $\text{NaHCO}_3$  aqueous solution,  $\text{H}_2\text{O}$  and brine, and then dried over  $\text{MgSO}_4$ . Removal of the solvent gave a residue, which was purified by silica gel column chromatography (hexane : AcOEt = 3 : 2) to generate alcohol (344 mg, 95% yield) as a colorless oil.  $[\alpha]_{\text{D}}^{22} +1.5$  ( $c$  0.75,  $\text{CHCl}_3$ ); IR (neat)  $\text{cm}^{-1}$  : 3445, 2944, 1734;  $^1\text{H-NMR}$  (400 MHz,  $\text{CDCl}_3$ )  $\delta$ : 7.34-7.27 (5H, m), 4.92 (1H, t,  $J$  = 0.7 Hz), 4.84 (1H, t,  $J$  = 1.4 Hz), 4.49 (2H, s), 4.24 (1H, dd,  $J$  = 11.7, 4.8 Hz), 4.08 (1H, dd,  $J$  = 0.7 Hz), 4.01 (1H, br t,  $J$  = 1.70, 5.8 Hz), 3.47 (2H, t,  $J$  = 6.1 Hz), 2.46 (1H, m), 2.02 (3H, s), 1.98 (3H, s), 1.75 (2H, m), 1.70 (3H, s), 1.62-1.49 (4H, m), 1.38 (3H, s), 1.34 (2H, s);  $^{13}\text{C-NMR}$  (100 MHz,  $\text{CDCl}_3$ )  $\delta$ : 171.0, 170.3, 147.0, 138.5, 128.3, 127.6, 127.5, 111.5, 86.0, 75.8, 72.8, 70.1, 64.0, 43.7, 31.9, 28.4, 28.1, 24.0, 22.3, 21.4, 21.0, 17.4; EIMS  $m/z$ : 361 ( $\text{M}^+\text{-OAc}$ , 100); HREIMS  $m/z$ : 443.2399 (Calcd for  $\text{C}_{24}\text{H}_{36}\text{O}_6$ :  $\text{M}^+\text{+Na}$ , 443.2410); *Anal.*: Calcd for  $\text{C}_{24}\text{H}_{36}\text{O}_6$ : C, 68.54 ; H, 8.63. Found: C, 68.52; H, 8.62.

To a cold (0 °C) solution of the above alcohol (44.6 g, 106 mmol) in  $\text{CH}_2\text{Cl}_2$  (212 mL) were added hexachloroacetone (19.3 mL, 127 mmol) and  $\text{Ph}_3\text{P}$  (33.3 g, 127 mmol). After stirring for 5 min at the same temperature, the reaction mixture was concentrated under reduced pressure to give a residue which was then purified by silica gel column chromatography (hexane/AcOEt = 3 : 1) to generate allylic chloride **6** (41.9 g, 90% yield) as a colorless oil.  $[\alpha]_{\text{D}}^{23} -1.3$  ( $c$  0.78,  $\text{CHCl}_3$ ); IR (neat)  $\text{cm}^{-1}$ : 2951, 1732;  $^1\text{H-NMR}$  (400 MHz,  $\text{CDCl}_3$ )  $\delta$ : 7.35-7.27 (5H, m), 5.00 (1H, s), 4.89 (1H, q,  $J$  = 1.5 Hz), 4.49 (2H, s), 4.31 (1H, t,  $J$  = 11.7, 4.4 Hz), 3.47 (2H, t,  $J$  = 6.1 Hz), 2.50 (1H, m), 2.03 (3H, s), 1.98 (3H, s), 1.97-1.74 (4H, m), 1.79 (3H, s), 1.56 (2H, m), 1.38 (3H, s), 1.35 (2H, m);  $^{13}\text{C-NMR}$  (100 MHz,  $\text{CDCl}_3$ )  $\delta$ : 170.9, 170.2, 144.0, 138.5, 128.3, 127.6, 127.5, 114.5, 85.7, 72.8, 70.0, 66.9, 63.8, 43.7, 33.7, 30.6, 28.1, 24.1, 22.3, 21.4, 21.0, 16.9; EIMS  $m/z$ : 437 ( $\text{M}^+\text{-H}$ , 10), 379 ( $\text{M}^+\text{-OAc}$ , 100); HREIMS  $m/z$ : 378.2025 (Calcd for  $\text{C}_{22}\text{H}_{31}\text{O}_3\text{Cl}$ :  $\text{M}^+\text{-AcOH}$ , 378.1962); *Anal.*: Calcd for  $\text{C}_{22}\text{H}_{31}\text{O}_3\text{Cl}$ : C, 65.66 ; H, 8.04. Found: C, 65.60; H, 8.11.

**(2S)-5-Benzyloxy-2-[(2R,5S)-(5-chloro-2,6,6-trimethyltetrahydropyran-2-yl)]-pentyl pivalate (7)**. To a cold (-78 °C) solution of diacetate **6** (208 mg, 473  $\mu\text{mol}$ ) in toluene (4.70 mL) was added DIBAH (1.05 mL, 945  $\mu\text{mol}$ , 0.9 M in hexane). After stirring for 10 min at the same temperature, the reaction mixture was diluted with  $\text{Et}_2\text{O}$ , warmed to r.t. and stirred for 3 hr. The mixture was dried over  $\text{MgSO}_4$ . Removal of the solvent gave crude diol, which was used the next reaction without further purification.

To a solution of the above crude diol in pyridine (500  $\mu\text{L}$ ) was added PivCl (65.4 mg, 567  $\mu\text{mol}$ ) at r.t. After stirring for 30 min at an ambient temperature, the reaction mixture was diluted with

Et<sub>2</sub>O, washed with sat. NaHCO<sub>3</sub> aqueous solution, H<sub>2</sub>O and brine, and then dried over MgSO<sub>4</sub>. Removal of the solvent gave a residue, which was purified by silica gel column chromatography (hexane : AcOEt = 4 : 1) to generate pivalate (161 mg, 78% yield, two steps) as a colorless oil.  $[\alpha]_D^{22} +1.6$  (*c* 1.27, CHCl<sub>3</sub>); IR (neat) cm<sup>-1</sup>: 3491, 2971, 1726; <sup>1</sup>H-NMR (400 MHz, CDCl<sub>3</sub>) δ: 7.35-7.28 (5H, m), 5.00 (1H, s), 4.88 (1H, m), 4.49 (2H, s), 4.35 (1H, t, *J* = 7.2 Hz), 4.28 (1H, dd, *J* = 11.7, 5.0 Hz), 4.18 (1H, dd, *J* = 11.79, 3.9 Hz), 3.48 (2H, t, *J* = 6.1 Hz), 1.99-1.91 (3H, m), 1.80 (3H, s), 1.71-1.57 (4H, m), 1.47 (1H, m), 1.36 (1H, m), 1.19 (9H, s), 1.15 (3H, s); <sup>13</sup>C-NMR (100 MHz, CDCl<sub>3</sub>) δ: 178.4, 144.3, 138.4, 128.3, 127.6, 127.5, 114.2, 74.0, 72.9, 70.1, 67.3, 64.2, 47.0, 38.7, 37.7, 30.5, 28.2, 27.2, 24.3, 24.1, 17.1; EIMS *m/z*: 439 (M<sup>+</sup>-H, 0.1), 421 (M<sup>+</sup>-OH, 4), 125 (100); HREIMS *m/z*: 420.2424 (Calcd for C<sub>25</sub>H<sub>39</sub>O<sub>4</sub>Cl: M<sup>+</sup>-H<sub>2</sub>O, 420.2431).

To a solution of the above pivalate (14.9 g, 34.0 mmol) in CH<sub>2</sub>Cl<sub>2</sub> (340 mL) was added IDCP (120 g, 255 mmol) at r.t. After stirring for 4 hr at an ambient temperature, the reaction mixture was diluted with Et<sub>2</sub>O, washed with sat. Na<sub>2</sub>S<sub>2</sub>O<sub>3</sub> aqueous solution, H<sub>2</sub>O and brine, and then dried over MgSO<sub>4</sub>. Removal of the solvent gave crude iodoether, which was used the next reaction without further purification.

To a cold (-78 °C) solution of the above crude iodoether in THF (175 mL) were added Bu<sub>3</sub>SnH (28.3 mL, 105 mmol) and Et<sub>3</sub>B (7.61 mL, 52.6 mmol). After stirring for 1 hr at the same temperature, the reaction mixture was diluted with Et<sub>2</sub>O, warmed to r.t. and added sat. KF aqueous solution (50 mL). After stirring for 30 min at the same temperature, the reaction mixture was washed with H<sub>2</sub>O and brine, and then dried over MgSO<sub>4</sub>. Removal of the solvent gave a residue, which was purified by silica gel column chromatography (hexane : AcOEt = 10 : 1) to generate tetrahydropyran **7** (10.8 g, 72% yield, two steps) as a colorless oil.  $[\alpha]_D^{22} -13.4$  (*c* 0.71, CHCl<sub>3</sub>); IR (neat) cm<sup>-1</sup>: 2957, 1727; <sup>1</sup>H-NMR (400 MHz, CDCl<sub>3</sub>) δ: 7.36-7.27 (5H, m), 4.49 (2H, s), 4.24 (1H, dd, *J* = 11.5, 4.1 Hz), 4.13 (1H, dd, *J* = 11.4, 4.4 Hz), 3.69 (1H, dd, *J* = 12.2, 4.3 Hz), 3.46 (2H, t, *J* = 6.2 Hz), 2.08 (1H, m), 1.98 (1H, m), 1.80-1.50 (5H, m), 1.35 (2H, m), 1.32 (3H, s), 1.25 (3H, s), 1.18 (3H, s); <sup>13</sup>C-NMR (100 MHz, CDCl<sub>3</sub>) δ: 178.6, 138.6, 128.3, 127.6, 127.5, 75.4, 75.1, 72.8, 70.4, 65.1, 63.7, 50.1, 38.7, 35.6, 30.5, 28.3, 27.2, 27.0, 23.5, 22.6, 22.4; EIMS *m/z*: 438 (M<sup>+</sup>, 12), 161 (100); HREIMS *m/z*: 438.2527 (Calcd for C<sub>25</sub>H<sub>39</sub>O<sub>4</sub>Cl: M<sup>+</sup>, 438.2537); *Anal.*: Calcd for C<sub>25</sub>H<sub>39</sub>O<sub>4</sub>Cl: C, 68.39 ; H, 8.95. Found: C, 68.56; H, 8.78.

**(2S,5RS)-5-(tert-Butyldimethylsilanyloxy)-2-[(2R,5S)-(5-chloro-2,6,6-trimethyltetrahydropyran-2-yl)]-5-hydroxy-6-heptenyl pivalate (8)**. A solution of benzyl ether **7** (3.80g, 8.66 mmol) in MeOH (28.9 mL) in the presence of 10% Pd/C (866 mg) was stirred at r.t. for 2.5 hr under a hydrogen atmosphere. The reaction mixture was diluted with AcOEt and filtered through silica gel pad and filtrate was concentrated under reduced pressured. The residue was purified by silica gel column chromatography (hexane : AcOEt = 2 : 1) to generate alcohol (3.00 g, 99% yield) as a colorless oil.  $[\alpha]_D^{28} -16.9$  (*c* 0.78, CHCl<sub>3</sub>); IR (neat) cm<sup>-1</sup>: 3434, 2957, 1726; <sup>1</sup>H-NMR (400 MHz, CDCl<sub>3</sub>) δ: 4.24 (1H, dd, *J* = 11.5, 4.3 Hz), 4.11 (1H, dd, *J* = 11.5, 4.7 Hz), 3.70 (1H, dd, *J* = 12.2, 4.2 Hz), 3.64 (2H, t, *J* = 6.1 Hz), 2.08 (1H, m), 2.01 (1H, m), 1.74-1.51 (7H, m), 1.34 (3H, s), 1.27

(3H, s), 1.25 (3H, s), 1.19 (9H, s);  $^{13}\text{C-NMR}$  (100 MHz,  $\text{CDCl}_3$ )  $\delta$ : 178.7, 75.6, 75.4, 65.0, 63.8, 63.0, 49.9, 38.8, 35.0, 31.2, 30.5, 27.2, 27.0, 23.2, 22.9, 22.6; EIMS  $m/z$ : 349 ( $\text{M}^+\text{+H}$ , 15), 331 ( $\text{M}^+\text{-OH}$ , 2), 161 (100); HREIMS  $m/z$ : 349.2147 (Calcd for  $\text{C}_{18}\text{H}_{33}\text{O}_4\text{Cl}$ :  $\text{M}^+\text{+H}$ , 349.2146); *Anal.*: Calcd for  $\text{C}_{18}\text{H}_{33}\text{O}_4\text{Cl}$ : C, 61.96 ; H, 9.53. Found: C, 62.18; H, 9.59.

To a solution of the above alcohol 19.7 mg, 56.5  $\mu\text{mol}$  in  $\text{CH}_2\text{Cl}_2$  (753  $\mu\text{L}$ ) were added  $\text{NaHCO}_3$  (17.1 mg, 203  $\mu\text{mol}$ ) and Dess-Martin periodinane (28.8 mg, 67.8  $\mu\text{mol}$ ) at r.t. After stirring for 10 min at an ambient temperature, the reaction mixture was diluted with  $\text{Et}_2\text{O}$  and added sat.  $\text{NaHCO}_3$  aqueous solution and sat.  $\text{Na}_2\text{S}_2\text{O}_3$  aqueous solution. After stirring for 15 min at the same temperature, the reaction mixture was washed with  $\text{H}_2\text{O}$  and brine, and then dried over  $\text{MgSO}_4$ . Removal of the solvent gave a residue, which was purified by silica gel column chromatography (hexane :  $\text{AcOEt}$  = 4 : 1) to generate aldehyde (19.2 mg, 98% yield) as a colorless oil.  $[\alpha]_{\text{D}}^{27}$  -19.6 ( $c$  0.89,  $\text{CHCl}_3$ ); IR (neat)  $\text{cm}^{-1}$ : 2976, 1726;  $^1\text{H-NMR}$  (400 MHz,  $\text{CDCl}_3$ )  $\delta$ : 9.78 (1H, t,  $J$  = 1.2 Hz), 4.26 (1H, dd,  $J$  = 11.6, 3.8 Hz), 4.07 (1H, dd,  $J$  = 11.6, 4.4 Hz), 3.69 (1H, dd,  $J$  = 12.2, 4.2 Hz), 2.56 (2H, m), 2.15-1.97 (2H, m), 1.87 (1H, m), 1.69-1.54 (4H, m), 1.33 (3H, s), 1.25 (6H, s), 1.18 (9H, s);  $^{13}\text{C-NMR}$  (100 MHz,  $\text{CDCl}_3$ )  $\delta$ : 202.0, 178.5, 75.6, 75.1, 64.8, 63.5, 49.4, 42.6, 38.8, 35.0, 30.4, 27.2, 27.0, 22.9, 22.6, 19.3; EIMS  $m/z$ : 347 ( $\text{M}^+$ , 4), 331 ( $\text{M}^+\text{-Me}$ , 1), 161 (100); HREIMS  $m/z$ : 331.1646 (Calcd for  $\text{C}_{18}\text{H}_{31}\text{O}_4\text{Cl}$ :  $\text{M}^+\text{-Me}$ , 331.1676).

To a cold (0  $^\circ\text{C}$ ) solution of the above aldehyde (184 mg, 530  $\mu\text{mol}$ ) in THF (5.30 mL) was added  $\text{CH}_2=\text{CHMgBr}$  (1.09 mL, 1.06 mmol, 0.97 M in THF). After stirring for 10 min at the same temperature, the reaction mixture was diluted with  $\text{Et}_2\text{O}$ , washed with sat.  $\text{NH}_4\text{Cl}$  aqueous solution,  $\text{H}_2\text{O}$  and brine, and then dried over  $\text{MgSO}_4$ . Removal of the solvent gave a residue, which was purified by silica gel column chromatography (hexane :  $\text{AcOEt}$  = 2 : 1) to generate diastereomeric mixture of alcohol (198 mg, 99% yield) as a colorless oil. IR (neat)  $\text{cm}^{-1}$ : 3439, 2958, 1727;  $^1\text{H-NMR}$  (400 MHz,  $\text{CDCl}_3$ )  $\delta$ : 5.84 (1H, m), 5.21 (1H, d,  $J$  = 17.2 Hz), 5.10 (1H, d,  $J$  = 10.4 Hz), 4.23 (1H, m), 4.13 (1H, m), 4.10 (1H, m), 3.70 (1H, dd,  $J$  = 12.3, 4.2 Hz), 2.09 (1H, m), 1.98 (1H, m), 1.80-1.48 (6H, m), 1.33 (3H, s), 1.30 (2H, m), 1.27 (3H, s), 1.22 (3H, s), 1.19 (3H, s);  $^{13}\text{C-NMR}$  (100 MHz,  $\text{CDCl}_3$ )  $\delta$ : 178.6, 141.0, 114.8, 114.6, 75.6, 75.4, 73.7, 72.7, 65.0, 63.8, 63.7, 38.8, 35.8, 35.4, 35.2, 35.1, 30.5, 29.7, 27.2, 27.0, 22.9, 22.8, 22.7, 22.6, 22.3; EIMS  $m/z$ : 375 ( $\text{M}^+\text{+H}$ , 0.3), 359 ( $\text{M}^+\text{-Me}$ , 0.2), 161 (100); HREIMS  $m/z$ : 359.1995 (Calcd for  $\text{C}_{20}\text{H}_{35}\text{O}_4\text{Cl}$ :  $\text{M}^+\text{-Me}$ , 359.1989); *Anal.*: Calcd for  $\text{C}_{20}\text{H}_{35}\text{O}_4\text{Cl}$ : C, 64.07 ; H, 9.41. Found: C, 64.17; H, 9.28.

To a solution of the above alcohol (15.1 mg, 40.3  $\mu\text{mol}$ ) in DMF (40.3  $\mu\text{L}$ ) were added imidazole (4.12 mg, 60.5  $\mu\text{mol}$ ) and TBSCl (6.68 mg, 44.3  $\mu\text{mol}$ ) at r.t. After stirring for 1 hr at an ambient temperature, the mixture was diluted with  $\text{Et}_2\text{O}$ , washed with  $\text{H}_2\text{O}$  and brine, and then dried over  $\text{MgSO}_4$ . Removal of the solvent gave a residue, which was purified by silica gel column chromatography (hexane :  $\text{AcOEt}$  = 10 : 1) to generate diastereomeric mixture of TBS ether **8** (19.5 mg, 99% yield) as a colorless oil. IR (neat)  $\text{cm}^{-1}$ : 2957, 1729;  $^1\text{H-NMR}$  (400 MHz,  $\text{CDCl}_3$ )  $\delta$ : 5.77 (1H, m), 5.13 (1H, m), 5.01 (1H, d,  $J$  = 10.4 Hz), 4.22 (1H, m), 4.15-4.01 (2H, m), 3.69 (1H, dd,  $J$  = 12.2, 4.2 Hz), 2.08 (1H, m), 1.99 (1H, m), 1.65-1.39 (6H, m), 1.32 (3H, s), 1.25 (3H, s), 1.21 (3H, s), 1.18 (9H, s), 0.89 (9H, s), 0.04 (6H, m);  $^{13}\text{C-NMR}$  (100 MHz,  $\text{CDCl}_3$ )  $\delta$ : 141.4, 141.2, 113.9,

79.9, 76.5, 73.7, 73.5, 64.3, 63.6, 53.1, 53.0, 37.3, 37.3, 37.0, 36.8, 30.5, 27.0, 25.8, 22.3, 21.8, 19.9, 19.8, -4.4, -4.8; EIMS  $m/z$ : 489 ( $M^+ + H$ , 10), 357 ( $M^+ - OTBS$ , 25), 161 (100); HREIMS  $m/z$ : 488.3098 (Calcd for  $C_{26}H_{49}O_4SiCl$ :  $M^+$ , 488.3089); *Anal.*: Calcd for  $C_{26}H_{49}O_4SiCl$ : C, 63.83 ; H, 10.10. Found: C, 63.89; H, 10.07.

**(2*S*,5*RS*)-5-(*tert*-Butyldimethylsilyloxy)-2-[(2*R*,5*S*)-(5-chloro-2,6,6-trimethyltetrahydropyran-2-yl)]-6-hepten-1-ol (9).** To a cold (-78 °C) solution of pivalate **8** (19.7 mg, 40.3 μmol) in  $CH_2Cl_2$  (400 μL) was added DIBAH (52.0 μL, 48.4 μmol, 0.93 M in hexane). After stirring for 10 min at the same temperature, the reaction mixture was diluted with  $Et_2O$ , added with brine, warmed to r.t. and stirred for 3 hr. The mixture was dried with  $MgSO_4$ . Removal of the solvent gave a residue, which was purified by silica gel column chromatography (hexane : AcOEt = 4 : 1) to generate diastereomeric mixture of alcohol (15.8 mg, 97% yield) as a colorless oil. IR (neat)  $cm^{-1}$ : 3476, 2954;  $^1H$ -NMR (400 MHz,  $CDCl_3$ )  $\delta$ : 5.76 (1H, m), 5.13 (1H, d,  $J = 17.2$  Hz), 5.02 (1H, d,  $J = 10.4$  Hz), 4.05 (1H, m), 3.93 (1H, br d,  $J = 7.4$  Hz), 3.76-3.67 (2H, m), 3.57 (1H, m), 2.16-1.98 (2H, m), 1.79(1H, m), 1.66-1.51 (4H, m), 1.42 (2H, m), 1.38 (3H, s), 1.32 (3H, s), 1.23 (3H, s), 0.88 (9H, s), 0.02 (6H, s);  $^{13}C$ -NMR (100 MHz,  $CDCl_3$ )  $\delta$ : 141.4, 141.2, 113.9, 79.9, 76.5, 73.7, 73.5, 64.3, 63.6, 53.1, 53.0, 37.3, 37.3, 37.0, 36.8, 30.5, 27.0, 25.8, 22.3, 21.8, 19.9, 19.8, -4.4, -4.8; EIMS  $m/z$ : 405 ( $M^+ + H$ , 1), 347 ( $M^+ - tBu$ , 1), 59 (100); HREIMS  $m/z$ : 404.2521 (Calcd for  $C_{21}H_{41}O_3SiCl$ :  $M^+$ , 404.2514); *Anal.*: Calcd for  $C_{21}H_{41}O_3SiCl$ : C, 62.26 ; H, 10.20. Found: C, 62.45; H, 10.07.

To a solution of the above alcohol (240 mg, 592 μmol) in  $CH_2Cl_2$  (6.00 mL) were added  $NaHCO_3$  (300 mg, 3.55 mmol) and Dess-Martin periodinane (377 mg, 888 μmol) at r.t. After stirring for 30 min at an ambient temperature, the reaction mixture was diluted with  $Et_2O$  and added sat.  $NaHCO_3$  aqueous solution and sat.  $Na_2S_2O_3$  aqueous solution. After stirring for 15 min at the same temperature, the reaction mixture was washed with  $H_2O$  and brine, and then dried over  $MgSO_4$ . Removal of the solvent gave crude aldehyde. The crude aldehyde was used next reaction without further purification.

To a cold (-78 °C) solution of  $CH_2=C(CH_3)CH_2P(O)Ph_2$  (607 mg, 2.37 mmol) in THF (6.00 mL) were added HMPA (425 mg, 2.37 mmol) and BuLi (840 mL, 1.18 mmol, 1.41 M in hexane). After stirring for 1 hr at the same temperature, a solution of the above crude aldehyde in THF (1.00 mL) was added to the mixture. The mixture was warmed to r.t. over 2 hr. The reaction mixture was diluted with  $Et_2O$ , washed with sat.  $NH_4Cl$  aqueous solution,  $H_2O$  and brine, and then dried over  $MgSO_4$ . Removal of the solvent gave a residue, which was purified by silica gel column chromatography (hexane : AcOEt = 40 : 1) to generate triene **9** (205 mg, 78% yield, two steps) as a colorless oil. IR (neat)  $cm^{-1}$ : 2928;  $^1H$ -NMR (400 MHz,  $CDCl_3$ )  $\delta$ : 6.05 (1H, d  $J = 15.7$  Hz), 5.78 (1H, m), 5.37 (1H, dd,  $J = 15.8, 9.8$  Hz), 5.13 (1H, m), 5.00 (1H, m), 4.87 (2H, s), 4.06 (1H, m), 3.64 (1H, dd,  $J = 12.4$  Hz, 4.1 Hz), 2.14-1.92 (2H, m), 1.84 (2H, m), 1.82 (3H, s), 1.51-1.05 (5H, m), 1.33 (3H, s), 1.27 (3H, s), 1.22 (3H, s), 0.90 (9H, s), 0.03 (6H, s);  $^{13}C$ -NMR (100 MHz,  $CDCl_3$ )  $\delta$ : 142.0, 141.8, 135.5, 131.4, 131.3, 114.6, 113.4, 113.2, 77.2, 75.2, 74.1, 74.0, 65.5, 55.7, 55.5,

36.6, 33.3, 33.2, 30.4, 27.1, 25.9, 25.1, 24.0, 23.9, 22.4, 18.8, 18.3, -4.4, -4.4; EIMS  $m/z$ : 440 ( $M^+$ , 20), 383 ( $M^+ - tBu$ , 16), 161 (100); HREIMS  $m/z$ : 440.2851 (Calcd for  $C_{25}H_{45}O_2SiCl$ :  $M^+$ , 440.2877).

**(4S,4aR,8aR)-4-((2R,5S)-5-Chloro-2,6,6-trimethyltetrahydro-2H-pyran-2-yl)-6-methyl-3,4,4a,7,8,8a-hexahydronaphthalen-1-one (10).** TBAF (3.00 mL, 3.00 mmol) and was added to trienen **9** (205 mg, 465  $\mu$ mol). The mixture stirred at r.t. for 2 hr. The reaction mixture was diluted with  $Et_2O$ , washed with  $H_2O$  and brine, and then dried over  $MgSO_4$ . Removal of the solvent gave a residue, which was purified by silica gel column chromatography (hexane : AcOEt = 5 : 1) to generate alcohol (146 mg, 96% yield) as a colorless oil. IR (neat)  $cm^{-1}$ : 3361, 2937;  $^1H$ -NMR (400 MHz,  $CDCl_3$ )  $\delta$ : 6.07 (1H, d  $J = 15.1$  Hz), 5.85 (1H, m), 5.38 (1H, dd,  $J = 15.7, 9.7$  Hz), 5.09 (1H, m), 4.88 (2H, s), 4.87 (2H, s), 4.09 (1H, br s), 3.66 (1H, m), 2.08 (1H, m), 1.98-1.75 (3H, m), 1.85 (3H, s), 1.61-1.48 (3H, m), 1.44-1.31 (3H, m), 1.33 (3H, s), 1.28 (3H, s), 1.24 (3H, s);  $^{13}C$ -NMR (100 MHz,  $CDCl_3$ )  $\delta$ : 141.9, 141.3, 141.2, 135.7, 135.7, 114.9, 114.5, 114.4, 75.5, 73.6, 55.7, 55.2, 35.6, 35.4, 33.2, 32.9, 30.3, 27.2, 25.2, 24.2, 22.4, 18.8; EIMS  $m/z$ : 327 ( $M^+ + H$ , 0.1), 161 (100).

To a solution of the above alcohol (146 mg, 447  $\mu$ mol) in  $CH_2Cl_2$  (5.00 mL) were added  $NaHCO_3$  (230 mg, 2.68 mmol) and Dess-Martin periodinane (380 mg, 894  $\mu$ mol) at r.t. After stirring for 30 min at an ambient temperature, the reaction mixture was diluted with  $Et_2O$  and added sat.  $NaHCO_3$  aqueous solution and sat.  $Na_2S_2O_3$  aqueous solution. After stirring for 15 min at the same temperature, the reaction mixture was washed with  $H_2O$  and brine, and then dried over  $MgSO_4$ . Removal of the solvent gave a residue, which was purified by silica gel column chromatography (hexane : AcOEt = 9 : 1) to generate *cis*-decalin **10** (144 mg, 99% yield) as a colorless oil.  $[\alpha]_D^{23}$  -82.5 ( $c$  0.48,  $CHCl_3$ ); IR (neat)  $cm^{-1}$ : 2927, 1721;  $^1H$ -NMR (500 MHz,  $CDCl_3$ )  $\delta$ : 5.17 (1H, s), 3.72 (1H, dd  $J = 12.4, 4.1$  Hz), 2.85 (1H, m), 2.64 (1H, m), 2.40 (1H, td,  $J = 17.5, 4.5$  Hz), 2.30 (1H, m), 2.20-1.98 (4H, m), 1.84-1.70 (4H, m), 1.57 (3H, s), 1.56 (1H, m), 1.51 (1H, m), 1.44 (1H, m), 1.44 (1H, m), 1.35 (3H, s), 1.29 (3H, s), 1.25 (3H, s);  $^1H$ -NMR (125 MHz,  $CDCl_3$ )  $\delta$ : 214.9, 134.0, 128.3, 76.4, 75.3, 65.1, 52.5, 44.3, 38.0, 35.3, 35.1, 30.5, 27.3, 26.3, 23.6, 22.6, 22.3, 21.3; EIMS  $m/z$ : 324 ( $M^+$ , 28), 189 (100); HREIMS  $m/z$ : 324.1852 (Calcd for  $C_{19}H_{29}O_2Cl$ :  $M^+$ , 324.1856); *Anal.*: Calcd for  $C_{19}H_{29}O_2Cl$ : C, 70.24; H, 9.00. Found: C, 70.32; H, 9.11.

**(1aR,3aR,7S,7aR,7bS)-7-((2R,5S)-5-Chloro-2,6,6-trimethyltetrahydro-2H-pyran-2-yl)-1a-methyl-octahydronaphtho[2,1-*b*]oxiren-4(7bH)-one (11a) and (1aS,3aS,7S,7aR,7bR)-7-((2R,5S)-5-chloro-2,6,6-trimethyltetrahydro-2H-pyran-2-yl)-1a-methyl-octahydronaphtho[2,1-*b*]oxiren-4(7bH)-one (11b).** To a cold (0 °C) solution of *cis*-decalin **10** (44.9 mg, 148  $\mu$ mol) in  $CH_2Cl_2$  (1.38 mL) were added  $Na_2HPO_4$  (118 mg, 829  $\mu$ mol) and *m*CPBA (110 mg, 415  $\mu$ mol). After stirring for 3 hr at the same temperature, the reaction mixture was diluted with  $Et_2O$ , added with  $Me_2S$  and stirred for 10 min. The mixture was washed with 1 M  $NaOH$  aqueous solution,  $H_2O$  and brine, and then dried over  $MgSO_4$ . Removal of the solvent gave a residue, which was purified by silica gel column chromatography (hexane : AcOEt = 3 : 1) to



generate  $\alpha$ -epoxide **11a** (11.2 mg, 24% yield) as colorless needles and  $\beta$ -epoxide **11b** (33.5 mg, 71% yield) as a colorless oil.  $\alpha$ -epoxide **11a**: mp: 164-168 °C;  $[\alpha]_D^{27}$  -88.2 (*c* 0.76, CHCl<sub>3</sub>); IR (KBr) cm<sup>-1</sup>: 2927, 1712; <sup>1</sup>H-NMR (400 MHz, CDCl<sub>3</sub>)  $\delta$ : 3.74 (1H, dd, *J* = 12.1, 4.3 Hz), 2.82 (1H, s), 2.57-2.52 (1H, m), 2.48-2.41 (1H, m), 2.22-2.02 (3H, m), 2.00-1.93 (1H, m), 1.92-1.72 (5H, m), 1.67-1.54 (3H, m), 1.40-1.31 (7H, m), 1.26 (3H, s), 1.23 (3H, s); <sup>13</sup>C-NMR (100 MHz, CDCl<sub>3</sub>)  $\delta$ : 213.8, 76.2, 75.6, 66.0, 64.8, 58.3, 51.2, 42.5, 39.0, 36.2, 35.6, 30.4, 27.2, 25.5, 23.6, 22.6, 22.3, 21.6, 19.1; ESIMS *m/z*: 341 (100); HRESIMS *m/z*: 341.1889 (Calcd for C<sub>19</sub>H<sub>29</sub>O<sub>3</sub>Cl: M<sup>+</sup>+H, 341.1883); *Anal.*: Calcd for C<sub>19</sub>H<sub>29</sub>O<sub>3</sub>Cl: C, 66.94 ; H, 8.57. Found: C, 66.98; H, 8.53,  $\beta$ -epoxide **11b**:  $[\alpha]_D^{27}$  -60.3 (*c* 1.21, CHCl<sub>3</sub>); IR (neat) cm<sup>-1</sup>: 2952, 1712; <sup>1</sup>H-NMR (400 MHz, CDCl<sub>3</sub>)  $\delta$ : 3.73 (1H, dd, *J* = 12.4, 4.3 Hz), 2.96 (1H, s), 2.63 (1H, ddd, *J* = 6.8, 4.0, 1.4 Hz), 2.36 (1H, dt, *J* = 18.0, 3.7 Hz), 2.28 (1H, dd, *J* = 13.6, 4.5 Hz), 2.22-2.11 (3H, m), 2.06-1.99 (2H, m), 1.86-1.80 (1H, m), 1.77-1.67 (3H, m), 1.63-1.52 (3H, m), 1.37 (3H, s), 1.28 (1H, s), 1.27 (6H, s), 1.25 (3H, s); <sup>13</sup>C-NMR (100 MHz, CDCl<sub>3</sub>)  $\delta$ : 212.3, 76.3, 75.5, 66.3, 65.0, 60.5, 51.4, 40.9, 38.1, 36.4, 35.6, 30.5, 27.3, 24.5, 23.6, 22.4, 21.0, 20.0, 20.0; ESIMS *m/z*: 359 (100), 341 (60); HRESIMS *m/z*: 341.1878 (Calcd for C<sub>19</sub>H<sub>29</sub>O<sub>3</sub>Cl : M<sup>+</sup>+H, 341.1883); *Anal.*: Calcd for C<sub>19</sub>H<sub>29</sub>O<sub>3</sub>Cl: C, 66.94; H, 8.57. Found: C, 67.13; H, 8.48.3

**tert-Butyl((1aR,3aR,4S,7S,7aS,7bS)-7-((2R,5S)-5-chloro-2,6,6-trimethyltetrahydro-2H-pyran-2-yl)-1a-methyldecahydronaphtho[2,1-b]oxiren-4-yloxy)dimethylsilane (12).** To a cold (0 °C) solution of ketone **10** (19.1 mg, 58.8  $\mu$ mol) in MeOH (588  $\mu$ L) was added NaBH<sub>4</sub> (3.3 mg, 88.2  $\mu$ mol). After stirring for 15 min at the same temperature, the reaction mixture was diluted with Et<sub>2</sub>O, washed with sat. NH<sub>4</sub>Cl aqueous solution, H<sub>2</sub>O and brine, and then dried over MgSO<sub>4</sub>. Removal of the solvent gave a residue, which was purified by silica gel column chromatography (hexane : AcOEt = 9 : 1) to generate  $\beta$ -alcohol (15.0 mg, 79% yield) as colorless needles and  $\alpha$ -alcohol (3.1 mg, 16% yield) as a colorless oil.  $\beta$ -alcohol: mp: 164-168 °C;  $[\alpha]_D^{27}$  +67.6 (*c* 1.12, CHCl<sub>3</sub>); IR (KBr) cm<sup>-1</sup>: 3365, 2933; <sup>1</sup>H-NMR (600 MHz, CDCl<sub>3</sub>)  $\delta$ : 5.69 (1H, d, *J* = 4.8 Hz), 3.74 (1H, dt, *J* = 12.1, 4.6 Hz), 3.69 (1H, dd, *J* = 12.5, 4.2 Hz), 2.08 (1H, dq, *J* = 12.9, 4.2 Hz), 2.02-1.90 (4H, m), 1.77-1.74 (1H, m), 1.69-1.66 (2H, m), 1.62-1.49 (6H, m), 1.45-1.39 (3H, m), 1.35 (3H, s), 1.25 (1H, s), 1.22 (6H, s), 0.91 (1H, m); <sup>13</sup>C-NMR (150 MHz, CDCl<sub>3</sub>)  $\delta$ : 129.5, 127.9, 76.1, 75.0, 72.9, 65.3, 51.2, 41.6, 37.7, 37.3, 30.5, 30.3, 29.7, 27.6, 25.2, 23.6, 22.7, 20.8, 16.7; ESIMS *m/z*: 327 (100); HRESIMS *m/z*: 327.2096 (Calcd for C<sub>19</sub>H<sub>31</sub>O<sub>2</sub>Cl : M<sup>+</sup>+H, 327.2091); *Anal.*: Calcd for C<sub>19</sub>H<sub>31</sub>O<sub>2</sub>Cl: C, 69.81 ; H, 9.56. Found: C, 69.59 ; H, 9.53.  $\alpha$ -alcohol:  $[\alpha]_D^{27}$  +21.5 (*c* 0.97, CHCl<sub>3</sub>); IR (neat) cm<sup>-1</sup>: 3365, 2934; <sup>1</sup>H-NMR (400 MHz, CDCl<sub>3</sub>)  $\delta$ : 5.68 (1H, dd, *J* = 4.3, 1.2 Hz), 3.77-3.68 (2H, m), 2.15-1.90 (6H, m), 1.78-1.66 (3H, m), 1.62 (3H, brs), 1.61-1.51 (3H, m), 1.50-1.41 (2H, m), 1.39-1.34 (4H, m), 1.22 (6H, s), 0.92 (1H, m); <sup>13</sup>C-NMR (100 MHz, CDCl<sub>3</sub>)  $\delta$ : 127.9, 77.2, 76.1, 75.0, 72.8, 65.3, 50.9, 41.3, 37.8, 37.3, 30.5, 30.3, 29.7, 27.6, 25.3, 23.5, 22.8, 20.8, 16.7; ESIMS *m/z*: 327 (100); HRESIMS *m/z*: 327.2088 (Calcd for C<sub>19</sub>H<sub>31</sub>O<sub>2</sub>Cl: M<sup>+</sup>+H, 327.2091); *Anal.*: Calcd for C<sub>19</sub>H<sub>31</sub>O<sub>2</sub>Cl: C, 69.81; H, 9.56. Found: C, 69.57; H, 9.55.

To a solution of the above  $\beta$ -alcohol (495 mg, 1.51 mmol) in DMF (1.51 mL) were added imidazole (165 mg, 2.42 mmol) and TBSCl (274 mg, 1.82 mmol) at r.t. After stirring for 10 hr at an ambient temperature, the reaction mixture was diluted with Et<sub>2</sub>O, washed with H<sub>2</sub>O and brine, and then dried over MgSO<sub>4</sub>. Removal of the solvent gave a residue, which was purified by silica gel column chromatography (hexane : AcOEt = 10 : 1) to generate TBS ether (664 mg, quantitative yield) as a colorless oil.  $[\alpha]_D^{27} +27.4$  (*c* 1.37, CHCl<sub>3</sub>); IR (neat) cm<sup>-1</sup>: 2952, 1470, 1378, 1254; <sup>1</sup>H-NMR (400 MHz, CDCl<sub>3</sub>)  $\delta$ : 5.64 (1H, d, *J* = 5.6 Hz), 3.72-3.64 (2H, m), 2.84 (1H, dq, *J* = 12.6, 4.3 Hz), 2.00-1.77 (6H, m), 1.65-1.60 (4H, m), 1.59-1.39 (6H, m), 1.35 (3H, s), 1.26 (1H, s), 1.22 (3H, s), 1.21 (3H, s), 0.88 (9H, s), 0.03 (6H, s); <sup>13</sup>C-NMR (100 MHz, CDCl<sub>3</sub>)  $\delta$ : 129.8, 128.0, 77.2, 77.2, 76.1, 75.0, 73.4, 65.3, 50.9, 42.1, 37.9, 37.3, 30.6, 30.5, 30.3, 27.7, 25.9, 25.5, 23.6, 22.8, 20.8, 18.2, 16.9, -4.7, -4.7; ESIMS *m/z*: 309 (100), 441 (10); HRESIMS *m/z*: 441.2961 (Calcd for C<sub>25</sub>H<sub>45</sub>ClO<sub>2</sub>Si: M<sup>+</sup>+H, 441.2956); *Anal.*: Calcd for C<sub>25</sub>H<sub>45</sub>ClO<sub>2</sub>Si: C, 68.06; H, 10.28. Found: C, 67.84; H, 10.21.

To a cold (0 °C) solution of the above TBS ether (155 mg, 351  $\mu$ mol) in CHCl<sub>3</sub> (3.51 mL) were added Na<sub>2</sub>HPO<sub>4</sub> (125 mg, 878  $\mu$ mol) and *m*CPBA (72.7 mg, 421  $\mu$ mol). After stirring for 1 hr at the same temperature, the reaction mixture was diluted with Et<sub>2</sub>O, added with Me<sub>2</sub>S and stirred for 10 min. The mixture was washed with 1 M NaOH aqueous solution, H<sub>2</sub>O and brine, and then dried over MgSO<sub>4</sub>. Removal of the solvent gave a residue, which was purified by silica gel column chromatography (hexane : AcOEt = 20 : 1) to generate epoxide **12** (150 mg, 99% yield) as a colorless oil.  $[\alpha]_D^{25} +8.00$  (*c* 1.11, CHCl<sub>3</sub>); IR (neat) cm<sup>-1</sup>: 2952, 1462, 1380, 1254; <sup>1</sup>H-NMR (400 MHz, CDCl<sub>3</sub>)  $\delta$ : 3.74 (1H, d, *J* = 2.3 Hz), 3.69 (1H, dd, *J* = 12.1, 4.3 Hz), 3.56-3.52 (1H, m), 2.10-1.97 (5H, m), 1.81-1.80 (2H, m), 1.64-1.61 (2H, m), 1.53-1.41 (5H, m), 1.32-1.22 (1H, m), 1.32 (3H, s), 1.26 (3H, s), 1.24 (3H, s), 1.22 (3H, s), 0.84 (9H, s), -0.01 (6H, s); <sup>13</sup>C-NMR (100 MHz, CDCl<sub>3</sub>)  $\delta$ : 76.4, 75.5, 72.7, 64.7, 63.6, 58.4, 46.5, 38.5, 38.0, 34.9, 30.8, 29.6, 27.8, 27.6, 25.8, 25.8, 25.8, 25.1, 22.6, 18.9, 18.0, 14.8, -4.7, -4.8; ESIMS *m/z*: 457 (100); HRESIMS *m/z*: 457.2904 (Calcd for C<sub>25</sub>H<sub>45</sub>ClO<sub>3</sub>Si: M<sup>+</sup>+H, 457.2905); *Anal.*: Calcd for C<sub>25</sub>H<sub>45</sub>ClO<sub>3</sub>Si: C, 65.68; H, 9.92. Found: C, 65.78; H, 9.78.

**(4*S*,4*aR*,5*R*,6*R*,8*aR*)-5-Azido-4-((2*R*,5*S*)-5-chloro-2,6,6-trimethyltetrahydro-2*H*-pyran-2-yl)-6-hydroxy-6-methyloctahydronaphthalen-1(2*H*)-one (13) and (4*S*,4*aR*,5*R*,6*R*,8*aS*)-5-azido-4-((2*R*,5*S*)-5-chloro-2,6,6-trimethyltetrahydro-2*H*-pyran-2-yl)-6-hydroxy-6-methyloctahydronaphthalen-1(2*H*)-one (14).** TBAF (1.0 M in THF, 15.6 mL, 15.6 mmol) was added to TBS ether **12** (712 mg, 1.56 mmol). The mixture stirred at 50 °C for 6 hr. The reaction mixture was diluted with Et<sub>2</sub>O, washed with H<sub>2</sub>O and brine, and then dried over MgSO<sub>4</sub>. Removal of the solvent gave a residue, which was purified by silica gel column chromatography (hexane : AcOEt = 1 : 1) to generate alcohol (497 mg, 93% yield) as a colorless oil.  $[\alpha]_D^{26} +19.9$  (*c* 1.20, CHCl<sub>3</sub>); IR (neat) cm<sup>-1</sup>: 3418, 2952, 1457; <sup>1</sup>H-NMR (400 MHz, CDCl<sub>3</sub>)  $\delta$ : 3.74 (1H, d, *J* = 2.8 Hz), 3.68 (1H, dd, *J* = 12.1, 4.3 Hz), 3.59 (1H, m), 2.18-2.16 (1H, m), 2.13-1.95 (3H, m), 1.86-1.82 (3H, m), 1.68-1.61 (3H, m), 1.56-1.36 (4H, m), 1.32 (3H, s), 1.32-1.26 (1H, m), 1.23 (3H, s), 1.21

(3H, s), 0.88 (1H, dq,  $J = 14.4, 4.8$  Hz);  $^{13}\text{C-NMR}$  (100 MHz,  $\text{CDCl}_3$ )  $\delta$ : 76.3, 75.5, 72.1, 64.7, 63.6, 58.5, 46.3, 38.4, 37.9, 34.4, 30.8, 28.6, 27.5, 27.5, 25.6, 25.0, 22.5, 18.9, 14.6; ESIMS  $m/z$ : 343 (100); HRESIMS  $m/z$ : 343.2023 (Calcd for  $\text{C}_{19}\text{H}_{31}\text{ClO}_3$ :  $\text{M}^+\text{+H}$ , 343.2016); *Anal.*: Calcd for  $\text{C}_{19}\text{H}_{31}\text{ClO}_3$ : C, 66.65; H, 9.11. Found: C, 66.55; H, 9.20.

To a solution of IBX (1.01 g, 3.62 mmol) in DMSO (7.25 mL) was added a solution of the above alcohol (497 mg, 1.45 mmol) in THF (7.25 mL) at r.t. After stirring for 20 min at an ambient temperature, the reaction mixture was diluted with  $\text{Et}_2\text{O}$  and filtered through celite pad. Removal of the solvent gave a residue, which was purified by silica gel column chromatography (hexane :  $\text{AcOEt} = 4 : 1$ ) to generate ketone (467 mg, 95% yield) as colorless rod-like crystals. mp: 164-168 °C;  $[\alpha]_{\text{D}}^{27} -88.2$  ( $c$  0.76,  $\text{CHCl}_3$ ); IR (KBr)  $\text{cm}^{-1}$ : 2927, 1712;  $^1\text{H-NMR}$  (400 MHz,  $\text{CDCl}_3$ )  $\delta$ : 3.74 (1H, dd,  $J = 12.1, 4.3$  Hz), 2.82 (1H, s), 2.57-2.52 (1H, m), 2.48-2.41 (1H, m), 2.22-2.02 (3H, m), 2.00-1.93 (1H, m), 1.92-1.72 (5H, m), 1.67-1.54 (3H, m), 1.40-1.31 (7H, m), 1.26 (3H, s), 1.23 (3H, s);  $^{13}\text{C-NMR}$  (100 MHz,  $\text{CDCl}_3$ )  $\delta$ : 213.8, 76.2, 75.6, 66.0, 64.8, 58.3, 51.2, 42.5, 39.0, 36.2, 35.6, 30.4, 27.2, 25.5, 23.6, 22.6, 22.3, 21.6, 19.1; ESIMS  $m/z$ : 341 (100); HRESIMS  $m/z$ : 341.1889 (Calcd for  $\text{C}_{19}\text{H}_{29}\text{ClO}_3$ :  $\text{M}^+\text{+H}$ , 341.1883); *Anal.*: Calcd for  $\text{C}_{19}\text{H}_{29}\text{ClO}_3$ : C, 66.94; H, 8.57. Found: C, 66.98; H, 8.53.

To a solution of the above ketone (733 mg, 2.15 mmol) in  $\text{MeOH}/\text{H}_2\text{O}$  (8 : 1, 21.5 mL) were added  $\text{NH}_4\text{Cl}$  (1.04 g, 19.4 mmol) and  $\text{NaN}_3$  (2.10 g, 32.3 mmol). The mixture was refluxed for 10 hr. The reaction mixture was filtered through silica gel pad. Removal of the solvent gave a residue, which was purified by silica gel column chromatography ( $\text{CHCl}_3$  : hexane :  $\text{Et}_2\text{O} = 4 : 1 : 1$ ) to generate *trans*-decalin **13** (523 mg, 63% yield) as a pale yellow oil and *cis*-decalin **14** (261 mg, 32% yield) as a pale yellow oil. *trans*-decalin **13**:  $[\alpha]_{\text{D}}^{25} +11.83$  ( $c$  1.07,  $\text{CHCl}_3$ ); IR (neat)  $\text{cm}^{-1}$ : 3447, 2958, 2107, 1704;  $^1\text{H-NMR}$  (400 MHz,  $\text{CDCl}_3$ )  $\delta$ : 4.11 (1H, s), 3.74 (1H, dd,  $J = 12.4, 4.3$  Hz), 2.49-2.25 (4H, m), 2.17-2.00 (3H, m), 1.90-1.77 (2H, m), 1.73-1.48 (6H, m), 1.37 (3H, s), 1.34 (3H, s), 1.33 (3H, s), 1.28 (3H, s), 0.88 (1H, m);  $^{13}\text{C-NMR}$  (100 MHz,  $\text{CDCl}_3$ )  $\delta$ : 212.7, 121.2, 77.6, 76.2, 72.9, 71.0, 64.5, 47.3, 44.9, 42.4, 39.1, 37.5, 32.9, 31.0, 29.7, 27.4, 25.7, 22.9, 21.0; ESIMS  $m/z$ : 384 (100); HRESIMS  $m/z$ : 384.2054 (Calcd for  $\text{C}_{19}\text{H}_{30}\text{ClN}_3\text{O}_3$ :  $\text{M}^+\text{+H}$ , 384.2054); *Anal.*: Calcd for  $\text{C}_{19}\text{H}_{30}\text{ClN}_3\text{O}_3$ : C, 59.44 ; H, 7.88 ; N, 10.95. Found: C, 59.42 ; H, 7.81 ; N, 10.83. *cis*-decalin **14**:  $[\alpha]_{\text{D}}^{25} -92.2$  ( $c$  1.75,  $\text{CHCl}_3$ ); IR (neat)  $\text{cm}^{-1}$ : 3444, 2952, 2106, 1703;  $^1\text{H-NMR}$  (400 MHz,  $\text{CDCl}_3$ )  $\delta$ : 4.10 (1H, s), 3.73 (1H, dd,  $J = 12.4, 4.3$  Hz), 2.49-2.24 (4H, m), 2.18-2.00 (3H, m), 1.90-1.84 (1H, m), 1.72-1.49 (7H, m), 1.37 (3H, s), 1.34 (3H, s), 1.32 (3H, s), 1.27 (3H, s), 0.97 (1H, m);  $^{13}\text{C-NMR}$  (100 MHz,  $\text{CDCl}_3$ )  $\delta$ : 212.8, 77.6, 76.2, 72.9, 71.0, 64.5, 47.2, 44.9, 42.3, 39.1, 37.4, 32.9, 31.0, 29.0, 27.4, 25.7, 22.9, 21.4, 21.0; ESIMS  $m/z$ : 384 (100); HRESIMS  $m/z$ : 384.2069 (Calcd for  $\text{C}_{19}\text{H}_{30}\text{ClN}_3\text{O}_3$  :  $\text{M}^+\text{+H}$ , 384.2054); *Anal.*: Calcd for  $\text{C}_{19}\text{H}_{30}\text{ClN}_3\text{O}_3$  : C, 59.44 ; H, 7.88 ; N, 10.95. Found: C, 59.52; H, 7.91; N, 10.77.

To a solution of *cis*-decalin **14** (18.7 mg, 48.7  $\mu\text{mol}$ ) in  $\text{EtOH}$  (974  $\mu\text{L}$ ) was added  $^t\text{BuOK}$  (5.5 mg, 48.7  $\mu\text{mol}$ ). After stirring for 2 hr at an ambient temperature, the reaction mixture was diluted with  $\text{Et}_2\text{O}$ , washed with  $\text{H}_2\text{O}$  and brine, and then dried over  $\text{MgSO}_4$ . Removal of the solvent gave a residue, which was purified by silica gel column chromatography ( $\text{CHCl}_3$  : hexane :  $\text{Et}_2\text{O} = 4 : 1 :$

1) to generate *trans*-decalin **13** (11.0 mg, 59% yield) as a pale yellow oil and *cis*-decalin **14** (7.4 mg, 40% yield) as a pale yellow oil.

**(1R,2R,4aS,8S,8aS)-1-Azido-8-((2R,5S)-5-chloro-2,6,6-trimethyltetrahydro-2H-pyran-2-yl)-2-methyl-5-methylenedecahydronaphthalen-2-ol (15)**. To a cold (-78 °C) solution of *trans*-decalin **13** (46.0 mg, 120 μmol) and 2-(methylsulfonyl)benzothiazole (102 mg, 480 μmol) in THF (1.20 mL) was added LiHMDS (218 μL, 240 μmol, 1.1 M in THF). After stirring for 3 hr at same temperature, the reaction mixture was diluted with Et<sub>2</sub>O, washed with sat. NH<sub>4</sub>Cl aqueous solution, H<sub>2</sub>O and brine, and then dried over MgSO<sub>4</sub>. Removal of the solvent gave a residue, which was purified by silica gel column chromatography (hexane : AcOEt = 10 : 1) to generate *exo*-olefine **15** (40.3 mg, 88% yield) as colorless rod-like crystals. mp: 117-120 °C; [α]<sub>D</sub><sup>25</sup> -13.6 (*c* 0.98, CHCl<sub>3</sub>); IR (KBr) cm<sup>-1</sup>: 3551, 2935, 2102, 1648, 896; <sup>1</sup>H-NMR (400 MHz, CDCl<sub>3</sub>) δ: 4.64 (1H, d, *J* = 1.5 Hz), 4.53 (1H, s), 4.47 (1H, s), 3.77 (1H, dd, *J* = 12.4, 4.5 Hz), 2.25 (1H, dt, *J* = 12.6, 3.6 Hz), 2.15-1.75 (8H, m), 1.70-1.47 (6H, m), 1.38 (6H, s), 1.33 (3H, s), 1.22 (3H, s), 0.91 (1H, m); <sup>13</sup>C-NMR (100 MHz, CDCl<sub>3</sub>) δ: 152.1, 104.3, 78.2, 76.2, 73.0, 69.0, 64.8, 48.6, 43.7, 38.4, 37.5, 35.7, 33.0, 31.5, 29.4, 29.1, 27.7, 24.7, 23.2, 19.7; ESIMS *m/z*: 339 (100), 382(5); HRESIMS *m/z*: 339.2086 (Calcd for C<sub>20</sub>H<sub>32</sub>ClN<sub>3</sub>O<sub>2</sub>: M<sup>+</sup>-N<sub>3</sub>, 339.2091); *Anal.*: Calcd for C<sub>20</sub>H<sub>32</sub>ClN<sub>3</sub>O<sub>2</sub>: C, 62.89; H, 8.44; N, 11.00. Found: C, 62.62; H, 8.41; N, 10.79.

**(1'S,4'S,4a'S,5'R,6'R,8a'S)-5'-Azido-4'-((2R,5S)-5-chloro-2,6,6-trimethyltetrahydro-2H-pyran-2-yl)-6'-methyl-1-tosyloctahydro-2'H-spiro[aziridine-2,1'-naphthalen]-6'-ol (16)**. To a solution of *exo*-olefine **15** (24.0 mg, 62.8 μmol) and 4A MS (1.1 mg) in CH<sub>3</sub>CN (3.14 mL) were added Cu(OTf)<sub>2</sub> (1.1 mg, 3.14 μmol) and PhI=NTs (47.0 mg, 126 μmol). After stirring for 3 hr at ambient temperature, the reaction mixture was diluted with Et<sub>2</sub>O and then filtered through celite pad. Removal of the solvent gave a residue, which was purified by silica gel column chromatography (hexane : AcOEt = 3 : 1) to generate aziridine **16** (15.9 mg, 46% yield) as colorless rod-like crystals. mp: 181-187 °C; [α]<sub>D</sub><sup>25</sup> -29.2 (*c* 0.15, CHCl<sub>3</sub>); IR (KBr) cm<sup>-1</sup>: 3501, 2955, 2103, 1383; <sup>1</sup>H-NMR (400 MHz, CDCl<sub>3</sub>) δ: 7.79 (2H, d, *J* = 8.1 Hz), 7.30 (2H, d, *J* = 8.1 Hz), 4.47 (1H, s), 3.77 (1H, dd, *J* = 12.1, 4.8 Hz), 2.47 (1H, s), 2.43 (3H, s), 2.35 (1H, d, *J* = 1.5 Hz), 2.23-2.18 (1H, m), 2.13-2.02 (5H, m), 1.95-1.91 (1H, m), 1.81-1.78 (1H, m), 1.69-1.49 (5H, m), 1.39 (3H, s), 1.37 (3H, s), 1.30 (3H, s), 1.25 (3H, s), 1.03-0.88 (3H, m); <sup>13</sup>C-NMR (100 MHz, CDCl<sub>3</sub>) δ: 143.6, 138.2, 129.4, 127.2, 78.0, 76.3, 72.8, 68.8, 64.5, 55.0, 47.9, 41.5, 38.3, 36.8, 36.1, 32.6, 31.5, 30.3, 29.2, 27.6, 26.9, 23.3, 21.6, 20.9, 19.8; ESIMS *m/z*: 551 (100); HRESIMS *m/z*: 551.2463 (Calcd for C<sub>27</sub>H<sub>39</sub>ClN<sub>4</sub>O<sub>4</sub>S: M<sup>+</sup>+H, 551.2459); *Anal.*: Calcd for C<sub>27</sub>H<sub>39</sub>ClN<sub>4</sub>O<sub>4</sub>S: C, 58.84; H, 7.13; N, 10.17. Found: C, 59.13; H, 7.17; N, 9.89.

***N*-((1S,4S,4aS,5R,6R,8aS)-5-Amino-4-((2R,5S)-5-chloro-2,6,6-trimethyltetrahydro-2H-pyran-2-yl)-6-hydroxy-1,6-dimethyldecahydronaphthalen-1-yl)-4-methylbenzenesulfonamide (17)**.

To a cold (0 °C) solution of aziridine **16** (22.0 mg, 39.9 μmol) in MeOH/THF (3 : 1, 798 μL) were added NiCl<sub>2</sub>·6H<sub>2</sub>O (15.2 mg, 63.8 μmol) and NaBH<sub>4</sub> (6.8 mg, 180 μmol). After stirring for 10 min at the same temperature, the mixture stirred at r.t. for 3 hr. The reaction mixture was diluted with AcOEt, and then filtered through celite pad. The filtrate was washed with brine and phosphate buffer (pH 7.5, EDTA 10 mM), and then dried over MgSO<sub>4</sub>. Removal of the solvent gave a residue, which was purified by silica gel column chromatography (AcOEt : MeOH = 10 : 1) to amine (17.6 mg, 84% yield) as colorless needles. mp: 198-201 °C; [ $\alpha$ ]<sub>D</sub><sup>25</sup> -4.10 (*c* 0.95, CHCl<sub>3</sub>); IR (KBr) cm<sup>-1</sup>: 3377, 2926, 1383, 1157; <sup>1</sup>H-NMR (400 MHz, CDCl<sub>3</sub>)  $\delta$ : 7.79 (2H, d, *J* = 8.3 Hz), 7.29 (2H, d, *J* = 8.3 Hz), 3.73 (1H, dd, *J* = 12.1, 4.8 Hz), 3.24 (1H, s), 2.48 (1H, s), 2.42 (3H, s), 2.43-2.42 (1H, m), 2.26-2.21 (1H, dt, *J* = 13.2, 3.6 Hz), 2.14-1.89 (6H, m), 1.67-1.49 (6H, m), 1.36 (3H, s), 1.36-1.30 (2H, m), 1.30 (3H, s), 1.27 (3H, s), 1.27-1.22 (1H, m), 1.22 (3H, s), 1.10-0.95 (2H, m); <sup>13</sup>C-NMR (100 MHz, CDCl<sub>3</sub>)  $\delta$ : 143.6, 138.3, 129.4, 129.4, 127.2, 127.2, 77.5, 76.0, 72.4, 64.5, 57.6, 55.6, 49.1, 42.2, 38.6, 36.7, 36.5, 32.0, 31.3, 30.9, 29.6, 27.5, 27.0, 22.4, 21.6, 20.6, 18.9; ESIMS *m/z*: 525 (100); HRESIMS *m/z*: 525.2538 (Calcd for C<sub>27</sub>H<sub>41</sub>ClN<sub>2</sub>O<sub>4</sub>S: M<sup>+</sup>+H, 525.2554); *Anal.*: Calcd for C<sub>27</sub>H<sub>41</sub>ClN<sub>2</sub>O<sub>4</sub>S: C, 61.75; H, 7.87; N, 5.33. Found: C, 61.95; H, 8.07; N, 5.11.

To a cold (0 °C) solution of the above amine (16.5 mg, 31.4 μmol) in THF (628 μL) was added LiBHEt<sub>3</sub> (471 μL, 471 μmol, 1.0 M in THF). After stirring for 1.5 hr at 40 °C, the reaction mixture was cooled to 0 °C, added with H<sub>2</sub>O, diluted with AcOEt, washed with brine, and then dried over MgSO<sub>4</sub>. Removal of the solvent gave a residue, which was purified by silica gel column chromatography (AcOEt) to generate tosylamine **17** (13.7 mg, 83% yield) as a pale yellow oil. [ $\alpha$ ]<sub>D</sub><sup>25</sup> -10.7 (*c* 0.15, CHCl<sub>3</sub>); IR (neat) cm<sup>-1</sup>: 3366, 2952, 1383, 1153; <sup>1</sup>H-NMR (400 MHz, CDCl<sub>3</sub>)  $\delta$ : 7.75 (2H, d, *J* = 8.4 Hz), 7.26 (2H, d, *J* = 8.3 Hz), 4.57 (1H, s), 3.68 (1H, dd, *J* = 12.1, 4.3 Hz), 3.20 (1H, d, *J* = 2.0 Hz), 2.41 (3H, s), 2.12-1.83 (4H, m), 1.62-1.34 (11H, m), 1.32 (4H, s), 1.27 (3H, s), 1.25 (3H, s), 1.17 (3H, s), 1.10 (3H, s), 0.88 (1H, m); <sup>13</sup>C-NMR (100 MHz, CDCl<sub>3</sub>)  $\delta$ : 142.8, 140.8, 129.4, 129.4, 127.0, 127.0, 77.5, 77.2, 75.9, 72.3, 64.5, 60.2, 57.7, 48.9, 41.5, 39.3, 38.6, 38.4, 32.5, 30.8, 29.6, 23.2, 22.4, 21.5, 21.4, 19.6, 18.9; ESIMS *m/z*: 527 (100); HRESIMS *m/z*: 527.2679 (Calcd for C<sub>27</sub>H<sub>43</sub>ClN<sub>2</sub>O<sub>4</sub>S: M<sup>+</sup>+H, 527.2710).

**Kalihinol A (1).** To a solution of naphthalene (10.3 mg, 80.6 μmol) in THF (3.06 mL) was added Li (11.1 mg, 161 μmol). The mixture was ultrasonicated till a color of the mixture turned into dark green and cooled to -78 °C. A solution of tosylamine **17** (42.5 mg, 80.6 μmol) in THF (5.0 mL) was added to the mixture. The mixture was warmed to r.t., stirred for 1 hr and then added with H<sub>2</sub>O. The mixture was filtered through celite pad. The filtrate was concentrated under reduced pressure to give crude diamine, which was used the next reaction without further purification.

To a solution of the above crude diamine in CH<sub>2</sub>Cl<sub>2</sub> (8.06 mL) was added acetic formic anhydride (5.0 mL). After stirring for 4 hr at r.t., the mixture was filtered through silica gel pad. The filtrate was concentrated under reduced pressure to give crude formamide, which was used the next reaction without further purification.

To a solution of the above crude formamide in  $\text{CH}_2\text{Cl}_2$  (537  $\mu\text{L}$ ) were added pyridine (6.52  $\mu\text{L}$ , 80.6  $\mu\text{mol}$ ) and  $\text{TsCl}$  (15.4 mg, 80.6  $\mu\text{mol}$ ). After stirring for 12 hr at r.t., the reaction mixture was concentrated under reduced pressure. The residue was purified by silica gel column chromatography ( $\text{AcOEt} : \text{MeOH} = 3 : 1$ ) to give kalihinol A (**1**) (23.4 mg, 74% yield, three steps) as rod-like crystals. mp : 232-235  $^\circ\text{C}$ ;  $[\alpha]_{\text{D}}^{25} +12.4$  ( $c$  0.64,  $\text{CHCl}_3$ ); IR (KBr)  $\text{cm}^{-1}$ : 3410, 2943, 2145, 1456, 1385;  $^1\text{H-NMR}$  (400 MHz,  $\text{CDCl}_3$ )  $\delta$ : 4.52 (1H, brs), 3.74 (1H, dd,  $J = 11.9, 4.8$  Hz), 2.08-1.98 (4H, m), 1.87-1.73 (4H, m), 1.70-1.46 (7H, m), 1.41 (3H, s), 1.34 (6H, s), 1.30 (3H, s), 1.16 (3H, s), 0.97 (1H, ddd,  $J = 14.2, 14.1, 3.3$  Hz);  $^{13}\text{C-NMR}$  (100 MHz,  $\text{CDCl}_3$ )  $\delta$ : 157.2 (t,  $J = 5.6$  Hz), 153.0 (t,  $J = 4.0$  Hz), 76.8, 75.9, 70.4, 64.1, 63.8 (t,  $J = 5.6$  Hz), 59.8 (t,  $J = 5.6$  Hz), 48.4, 42.3, 39.7, 37.9, 35.9, 32.5, 30.5, 28.8, 27.3, 22.8, 21.9, 21.6, 20.7, 19.1; ESIMS  $m/z$ : 366 (100), 393 (30); HRESIMS  $m/z$ : 393.2314 (Calcd for  $\text{C}_{22}\text{H}_{33}\text{ClN}_2\text{O}_2$ :  $\text{M}^+\text{+H}$ , 393.2309); *Anal.*: Calcd for  $\text{C}_{22}\text{H}_{33}\text{ClN}_2\text{O}_2$ : C, 67.24; H, 8.46; N, 7.13. Found: C, 67.01; H, 8.48; N, 6.83.

Ref.

mp : 233  $^\circ\text{C}$ ;  $[\alpha]_{\text{D}} +16$  ( $c$  1.0,  $\text{CHCl}_3$ ); IR ( $\text{CHCl}_3$ )  $\text{cm}^{-1}$ : 3595, 3390, 2135, 2100, 1385, 1378, 1105;  $^1\text{H-NMR}$  (300 MHz,  $\text{CDCl}_3$ )  $\delta$ : 4.51 (1H, brs), 3.72 (1H, dd,  $J = 12, 5$  Hz), 2.04-1.96 (3H, m), 1.72-1.44 (7H, m), 1.40 (3H, s), 1.33 (6H, s), 1.29 (3H, brt,  $J = 2$  Hz), 1.24 (1H, m), 1.15 (3H, s), 0.98 (1H, ddd,  $J = 14, 14, 3$  Hz); EILRMS  $m/z$ : 357 (4), 330 (7), 216 (9), 202 (8), 163 (71), 162 (18), 161 (94), 107 (58), 105 (22), 93 (34), 81 (41), 79 (25), 71 (36), 67 (53), 59 (45), 55 (40), 53 (31), 43 (58), 41 (100); EIHRMS  $m/z$ : 357.2561 (Calcd for  $\text{C}_{22}\text{H}_{33}\text{N}_2\text{O}_2$ :  $\text{M}^+\text{-Cl}$ , 357.2542), 330.2424 (Calcd for  $\text{C}_{21}\text{H}_{32}\text{NO}_2$ :  $\text{M}^+\text{-Cl-HCN}$ , 330.2433).

## Crystal data and structure refinement for 11a.

|                                   |                                                   |          |
|-----------------------------------|---------------------------------------------------|----------|
| Identification code               | compound 11a                                      |          |
| Empirical formula                 | C <sub>19</sub> H <sub>29</sub> Cl O <sub>3</sub> |          |
| Formula weight                    | 340.87                                            |          |
| Temperature                       | 90 K                                              |          |
| Wavelength                        | 0.71073 Å                                         |          |
| Crystal system                    | Orthorhombic                                      |          |
| Space group                       | P 21 21 21                                        |          |
| Unit cell dimensions              | a = 6.1306(15) Å                                  | α = 90°. |
|                                   | b = 18.463(5) Å                                   | β = 90°. |
|                                   | c = 31.983(8) Å                                   | γ = 90°. |
| Volume                            | 3620.1(16) Å <sup>3</sup>                         |          |
| Z                                 | 8                                                 |          |
| Density (calculated)              | 1.251 Mg/m <sup>3</sup>                           |          |
| Absorption coefficient            | 0.224 mm <sup>-1</sup>                            |          |
| F(000)                            | 1472                                              |          |
| Crystal size                      | 0.18 x 0.10 x 0.06 mm <sup>3</sup>                |          |
| Theta range for data collection   | 1.27 to 27.69°.                                   |          |
| Index ranges                      | -7 ≤ h ≤ 8, -23 ≤ k ≤ 24, -41 ≤ l ≤ 41            |          |
| Reflections collected             | 41645                                             |          |
| Independent reflections           | 8372 [R(int) = 0.0637]                            |          |
| Completeness to theta = 27.69°    | 99.5 %                                            |          |
| Absorption correction             | Empirical                                         |          |
| Max. and min. transmission        | 0.9867 and 0.9608                                 |          |
| Refinement method                 | Full-matrix least-squares on F <sup>2</sup>       |          |
| Data / restraints / parameters    | 8372 / 0 / 423                                    |          |
| Goodness-of-fit on F <sup>2</sup> | 1.035                                             |          |
| Final R indices [I > 2σ(I)]       | R1 = 0.0373, wR2 = 0.0812                         |          |
| R indices (all data)              | R1 = 0.0495, wR2 = 0.0859                         |          |
| Absolute structure parameter      | -0.03(4)                                          |          |
| Largest diff. peak and hole       | 0.244 and -0.200 e.Å <sup>-3</sup>                |          |

## Crystal data and structure refinement for 16.

|                                   |                                                                    |                 |
|-----------------------------------|--------------------------------------------------------------------|-----------------|
| Identification code               | compound 16                                                        |                 |
| Empirical formula                 | C <sub>27</sub> H <sub>39</sub> Cl N <sub>4</sub> O <sub>4</sub> S |                 |
| Formula weight                    | 551.13                                                             |                 |
| Temperature                       | 90 K                                                               |                 |
| Wavelength                        | 0.71073 Å                                                          |                 |
| Crystal system                    | Monoclinic                                                         |                 |
| Space group                       | P 21                                                               |                 |
| Unit cell dimensions              | a = 8.366(5) Å                                                     | α = 90°.        |
|                                   | b = 6.180(4) Å                                                     | β = 93.033(6)°. |
|                                   | c = 26.368(15) Å                                                   | γ = 90°.        |
| Volume                            | 1361.4(13) Å <sup>3</sup>                                          |                 |
| Z                                 | 2                                                                  |                 |
| Density (calculated)              | 1.344 Mg/m <sup>3</sup>                                            |                 |
| Absorption coefficient            | 0.258 mm <sup>-1</sup>                                             |                 |
| F(000)                            | 588                                                                |                 |
| Crystal size                      | 0.35 x 0.11 x 0.07 mm <sup>3</sup>                                 |                 |
| Theta range for data collection   | 1.55 to 27.66°.                                                    |                 |
| Index ranges                      | -10 ≤ h ≤ 10, -8 ≤ k ≤ 7, -34 ≤ l ≤ 34                             |                 |
| Reflections collected             | 13835                                                              |                 |
| Independent reflections           | 6037 [R(int) = 0.0692]                                             |                 |
| Completeness to theta = 27.66°    | 97.2 %                                                             |                 |
| Absorption correction             | Empirical                                                          |                 |
| Max. and min. transmission        | 0.9822 and 0.9153                                                  |                 |
| Refinement method                 | Full-matrix least-squares on F <sup>2</sup>                        |                 |
| Data / restraints / parameters    | 6037 / 1 / 340                                                     |                 |
| Goodness-of-fit on F <sup>2</sup> | 1.016                                                              |                 |
| Final R indices [I > 2σ(I)]       | R1 = 0.0494, wR2 = 0.1318                                          |                 |
| R indices (all data)              | R1 = 0.0599, wR2 = 0.1430                                          |                 |
| Absolute structure parameter      | 0.03(6)                                                            |                 |
| Largest diff. peak and hole       | 0.498 and -0.626 e.Å <sup>-3</sup>                                 |                 |



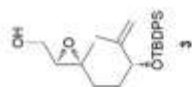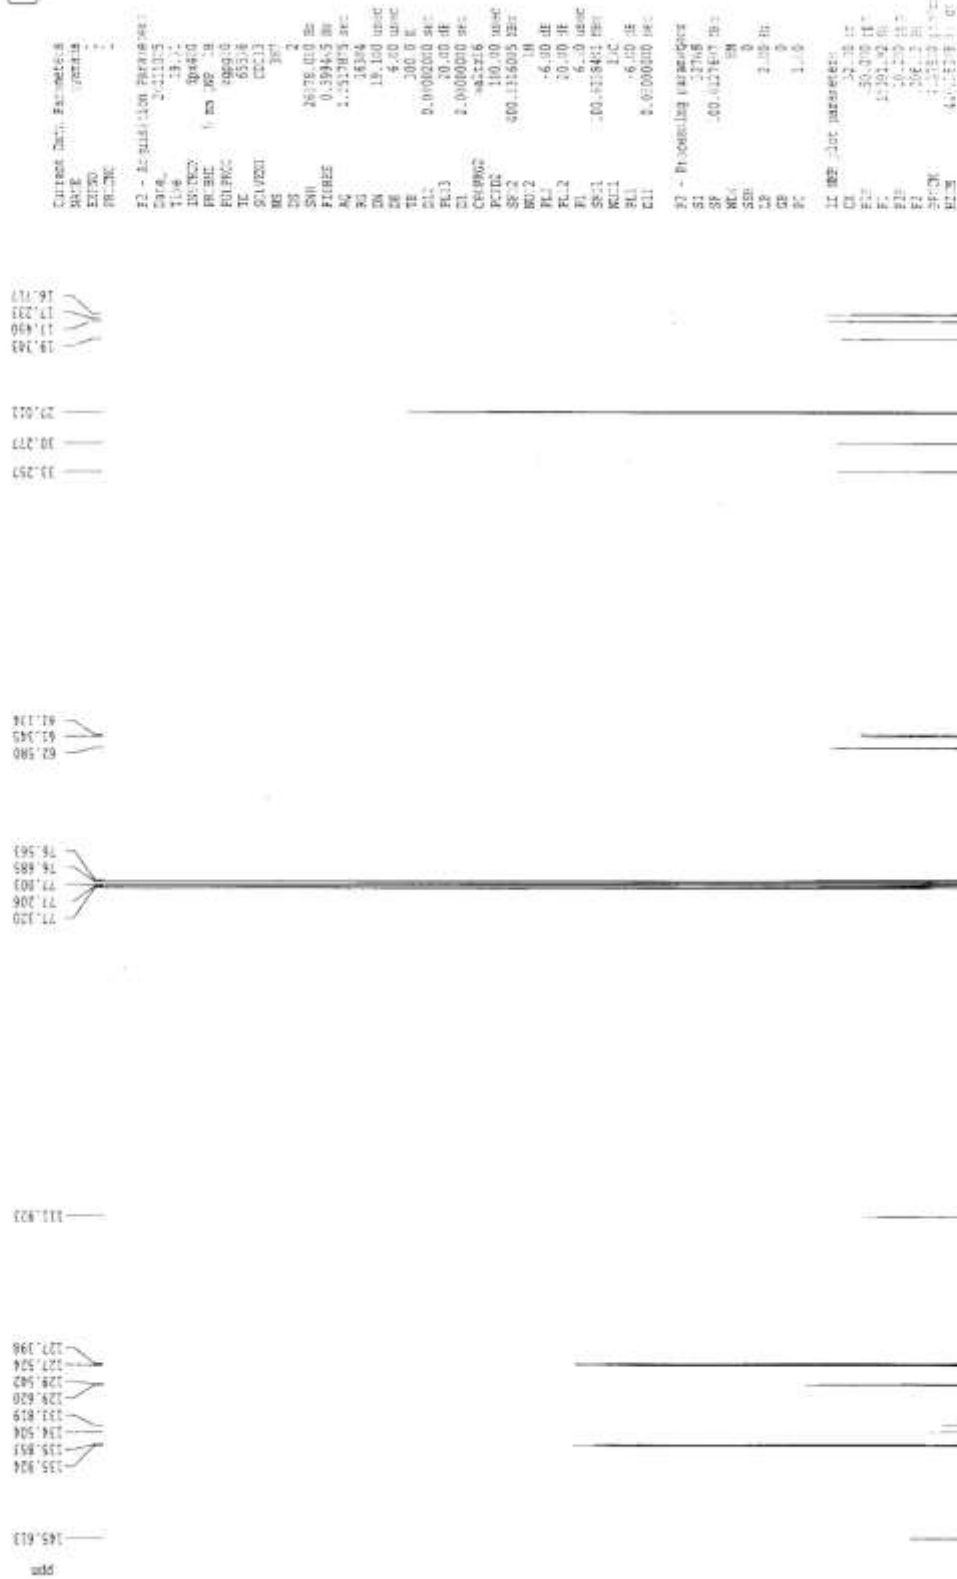



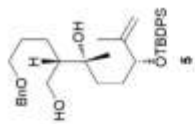

Current Data Parameters  
 NAME: Ynamida  
 EXPER: 1  
 INSTRNO: 1

F2 - Acquisition Parameters  
 Date: 2011-02-22  
 Time: 19:30  
 INSTRUM: dm6200  
 PRESSED: 4 mm QNP 1H  
 THERMOS: 250670  
 TO: 45574  
 ACQUISIT: CPMAS1  
 NS: 512  
 DS: 2  
 SWH: 32178.013 Hz  
 FIDRES: 0.339442 Hz  
 AQ: 1.2517875 sec  
 RG: 4096  
 INW: 19.100 usec  
 DE: 6.00 usec  
 TE: 300.0 K  
 D12: 0.0001000 sec  
 PULP3: 20.00 dB  
 D1: 2.0000000 sec  
 CPMPCP2: wait15  
 DPM3: 100.50 usec  
 SFO2: 400.1515005 MHz  
 NS2: 14  
 RG2: 4  
 DE2: 5.00 usec  
 TE2: 30.30 Hz  
 P1: 6.00 usec  
 SFO1: 100.6236011 MHz  
 NS1: 156  
 P6: 156  
 P61: -6.00 dB  
 D11: 0.0300000 sec

F2 - Processing parameters  
 SI: 32768  
 SF: 100.623597 MHz  
 KW: DM  
 SSB: 0  
 LB: 2.00 Hz  
 GB: 0  
 PC: 0.40

1D 13C plot parameters  
 CX: 21.00 dB  
 F1P: 150.000 MHz  
 F1: 150.91452 Hz  
 F2P: 20.018028 MHz  
 F2: 100.623597 MHz  
 FREQM: 4.3156779 MHz  
 SFOC: 140.1024877 MHz

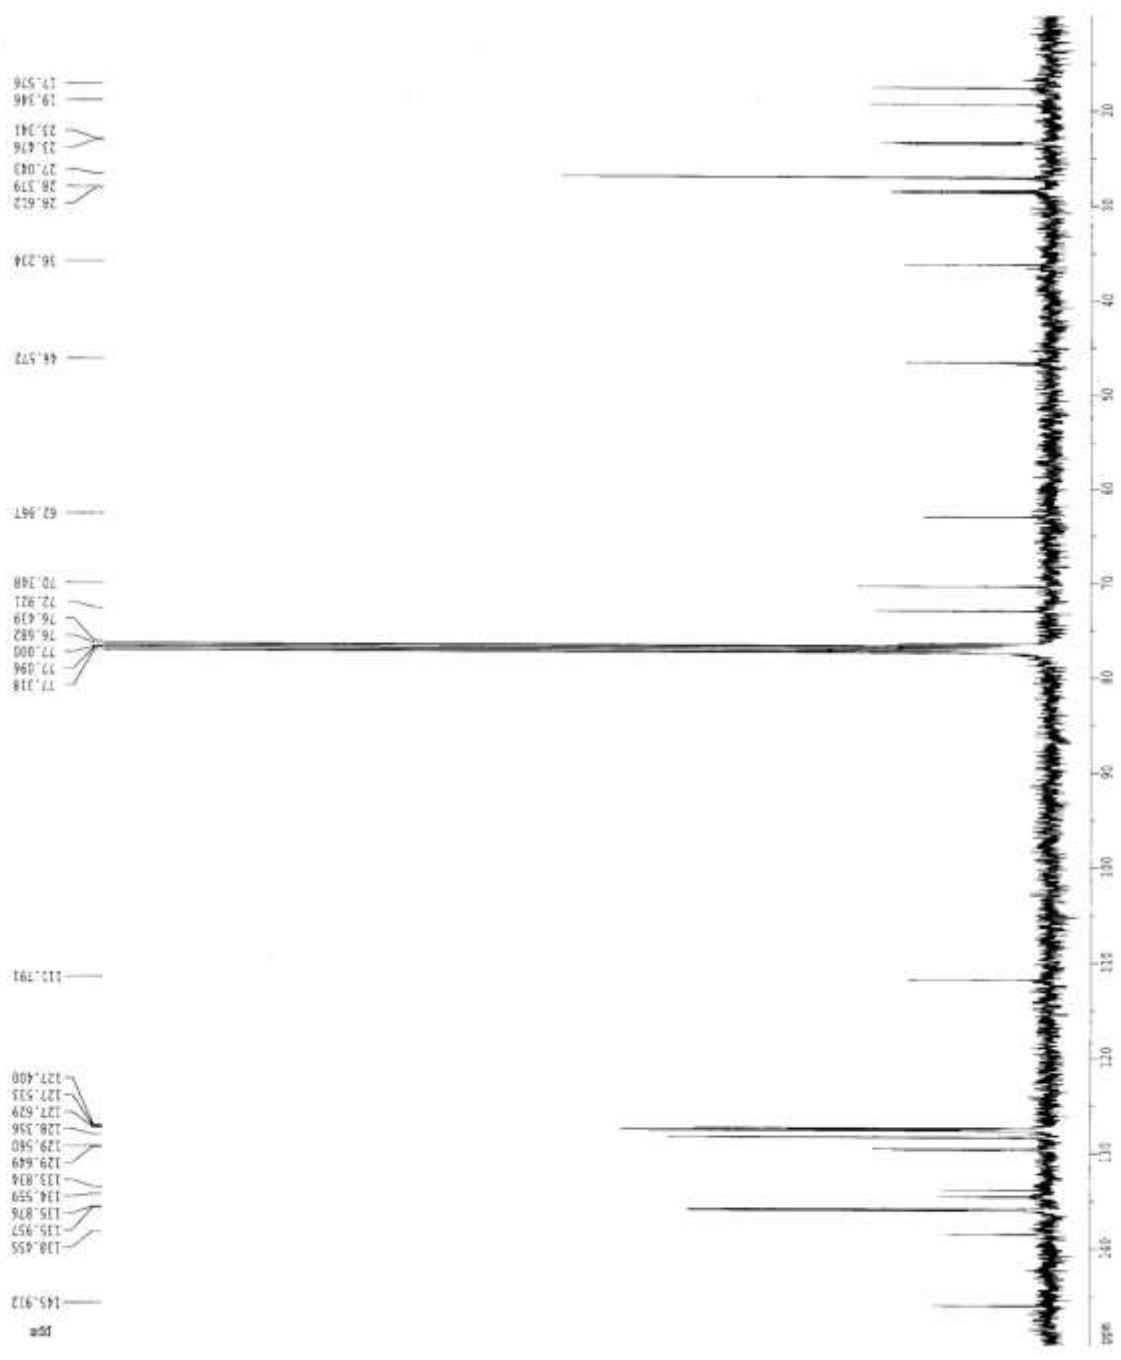

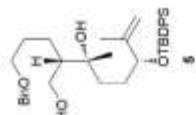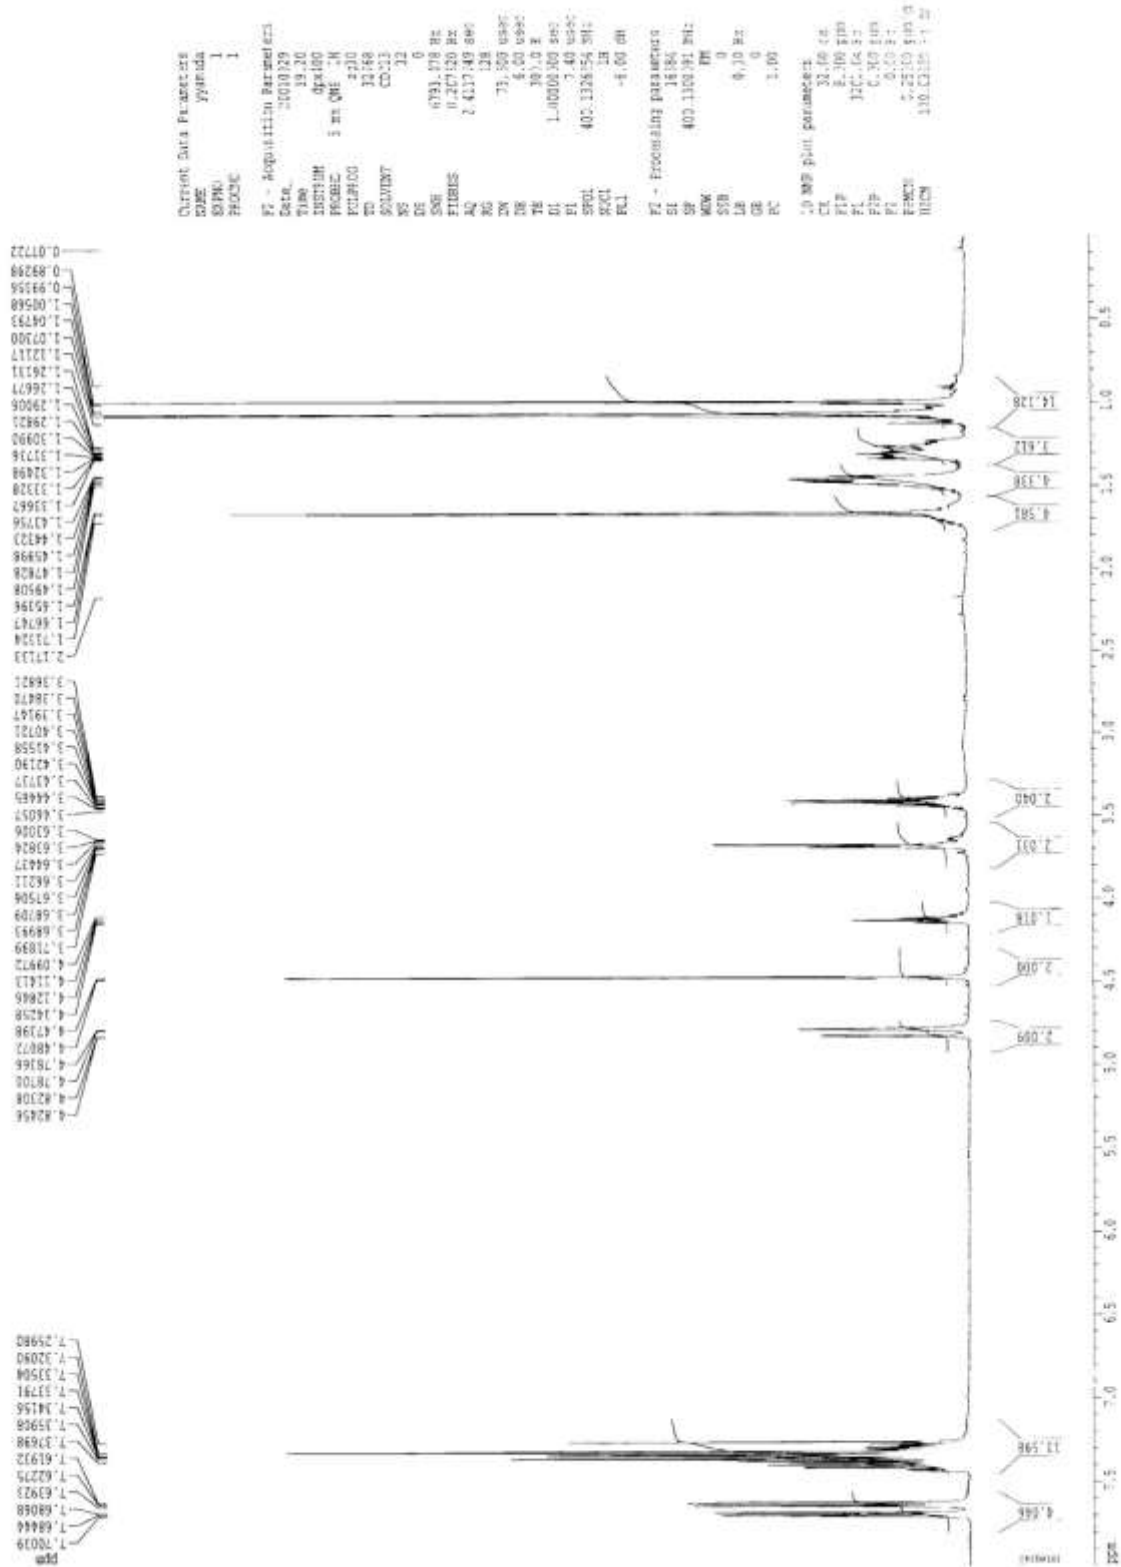

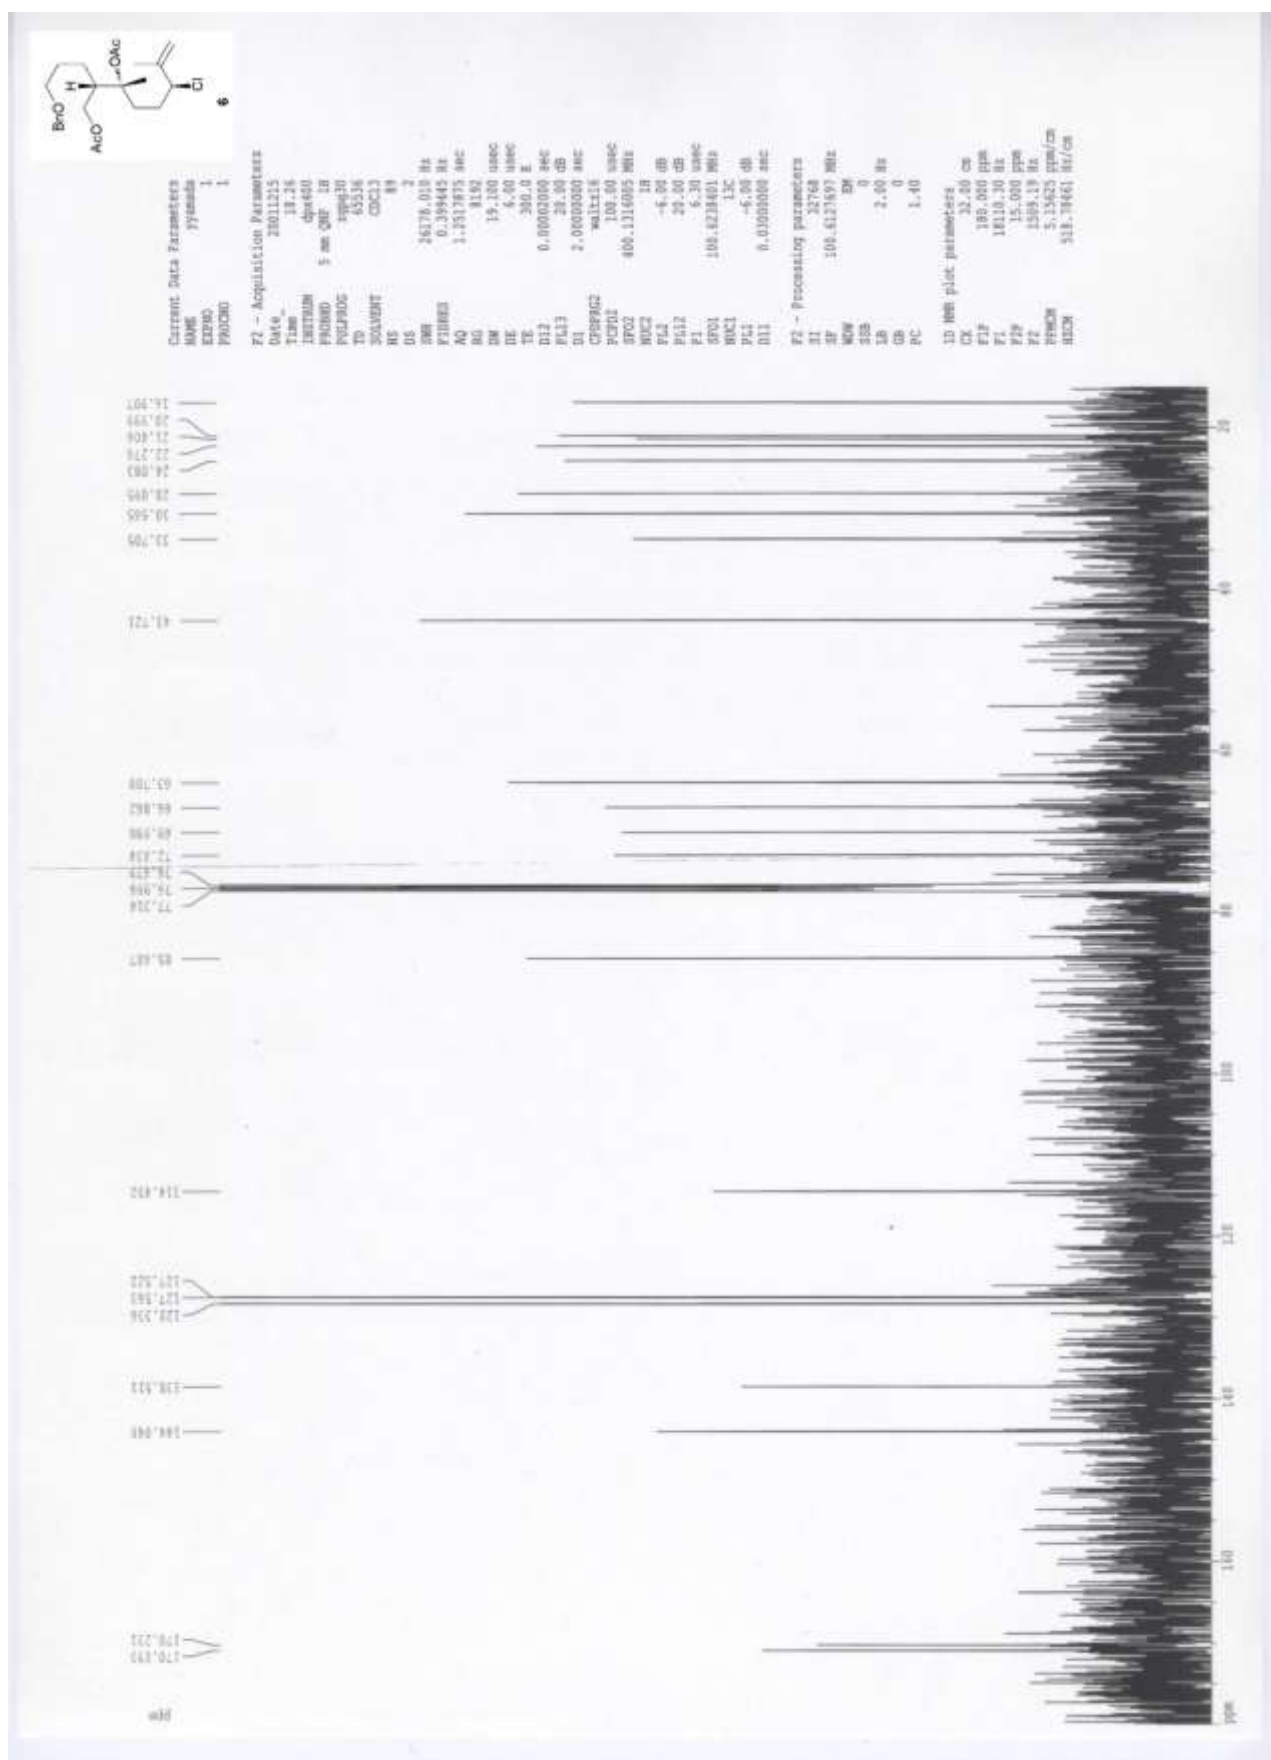

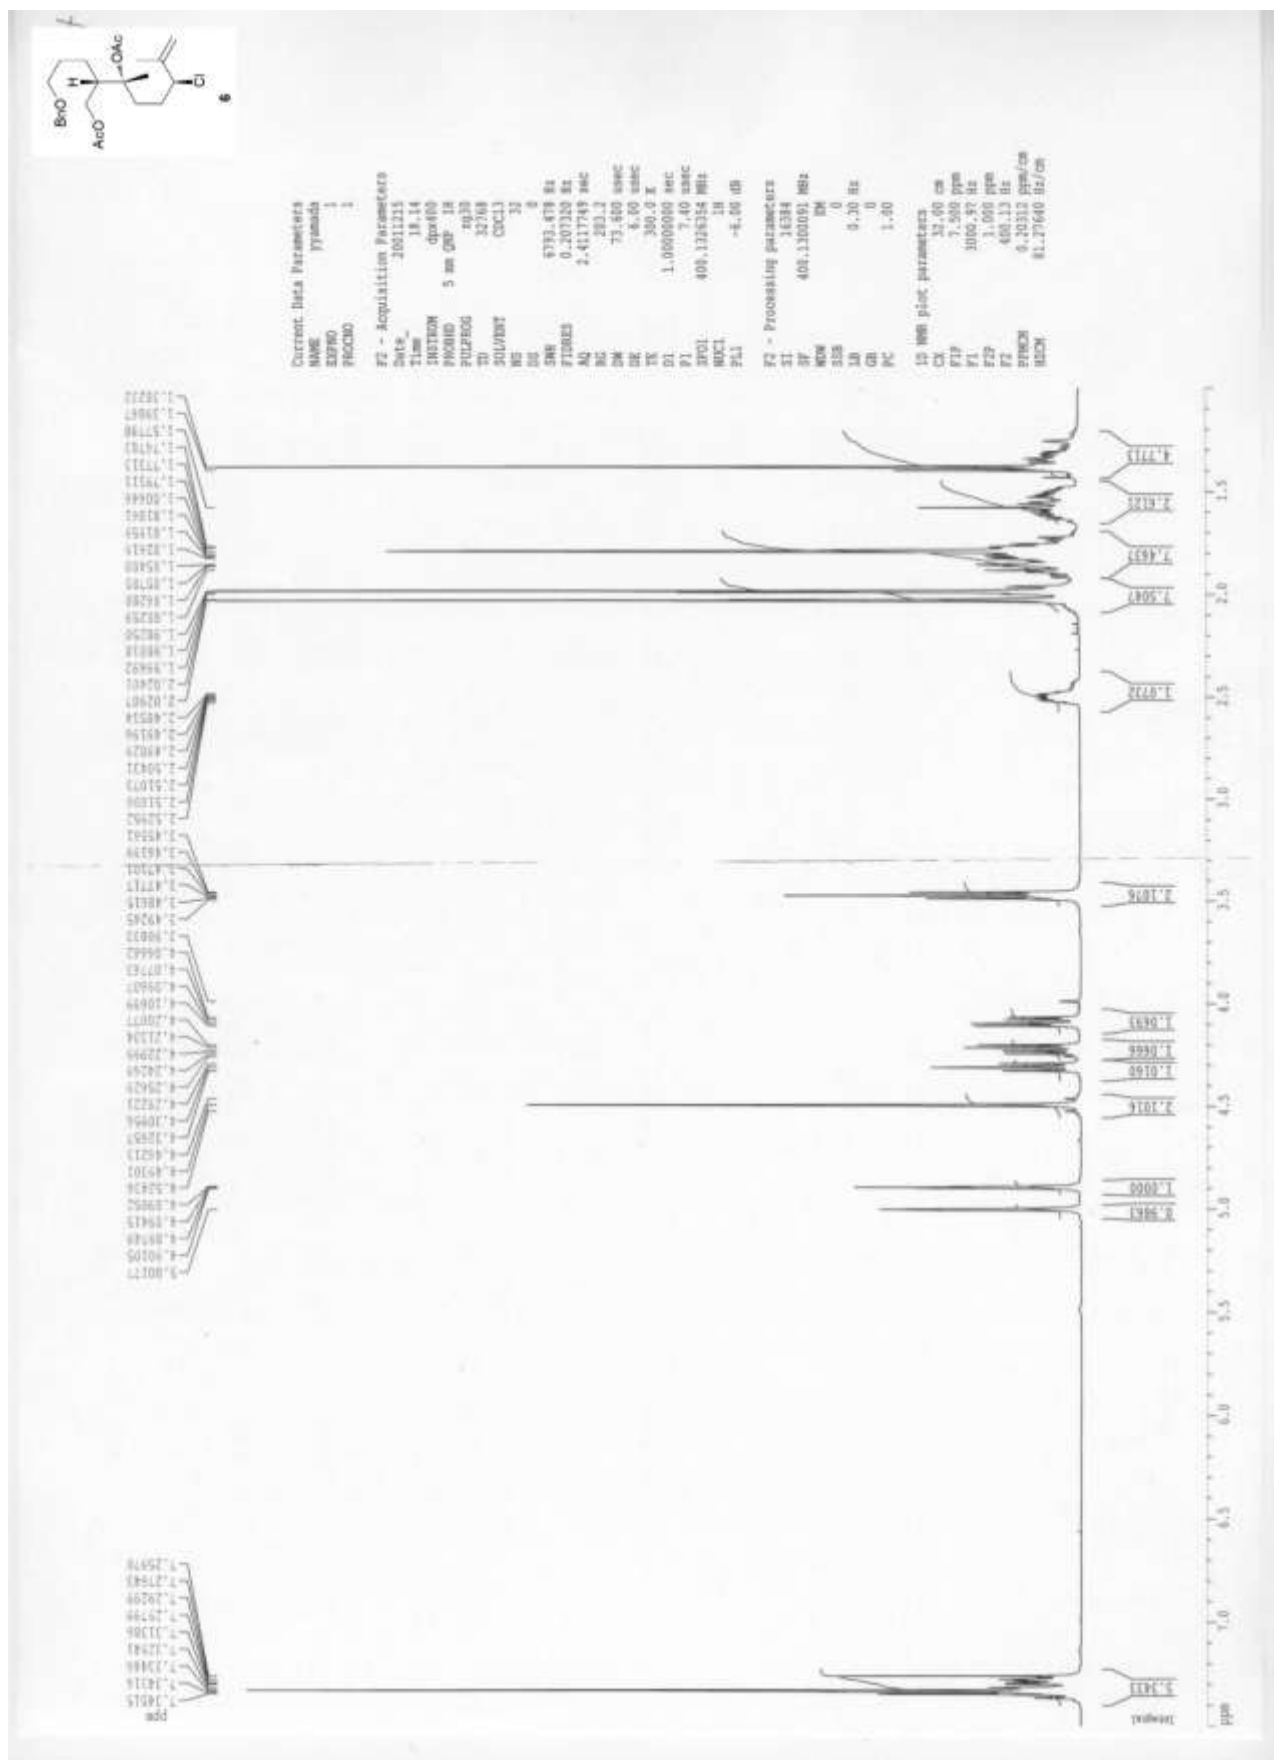

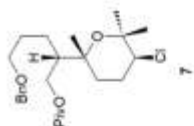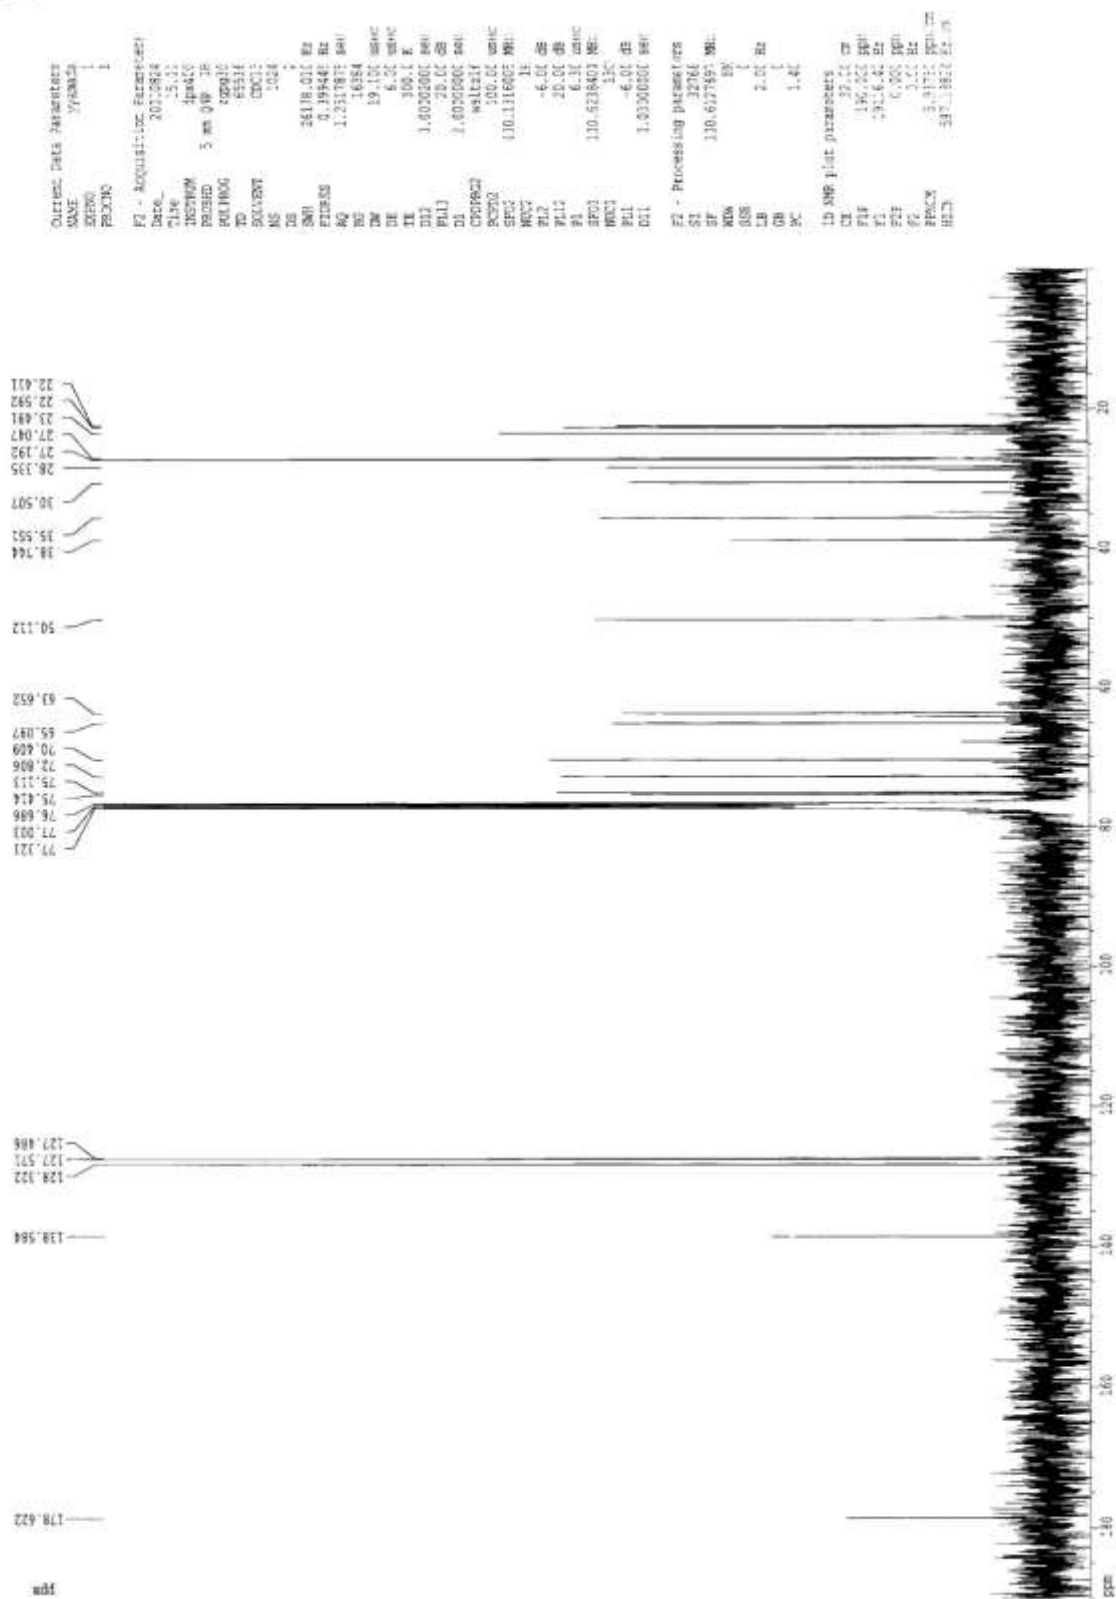

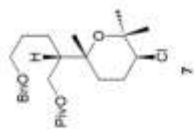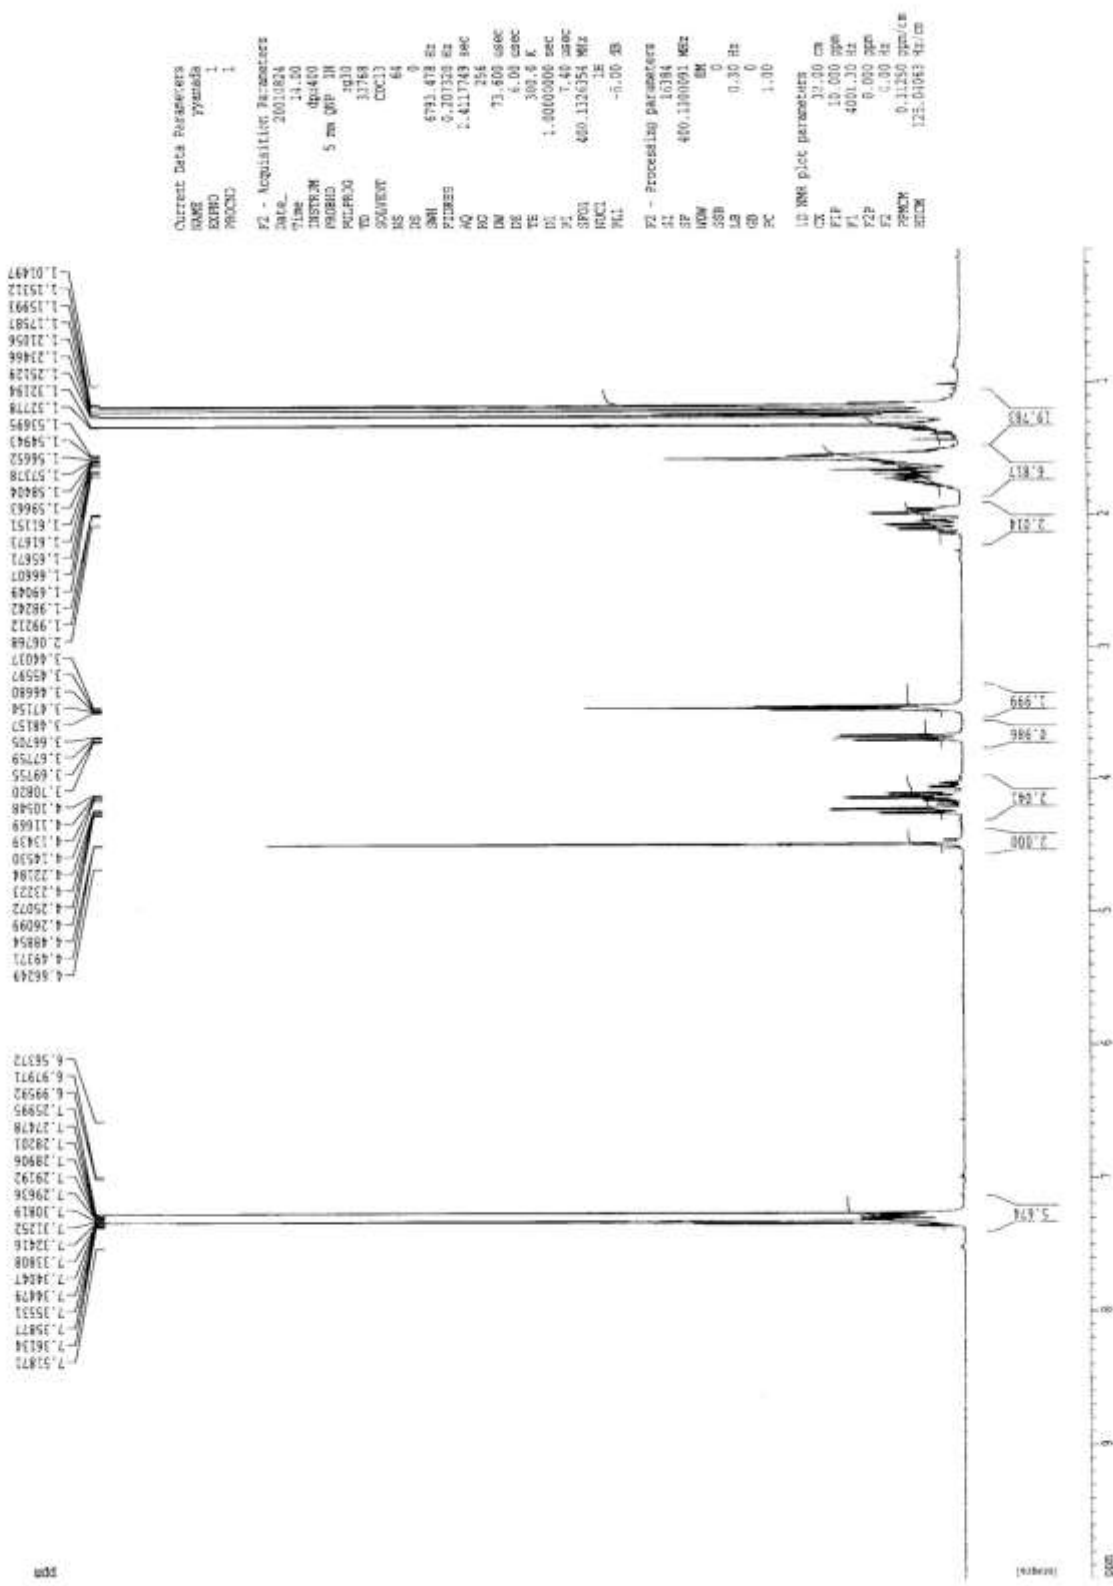



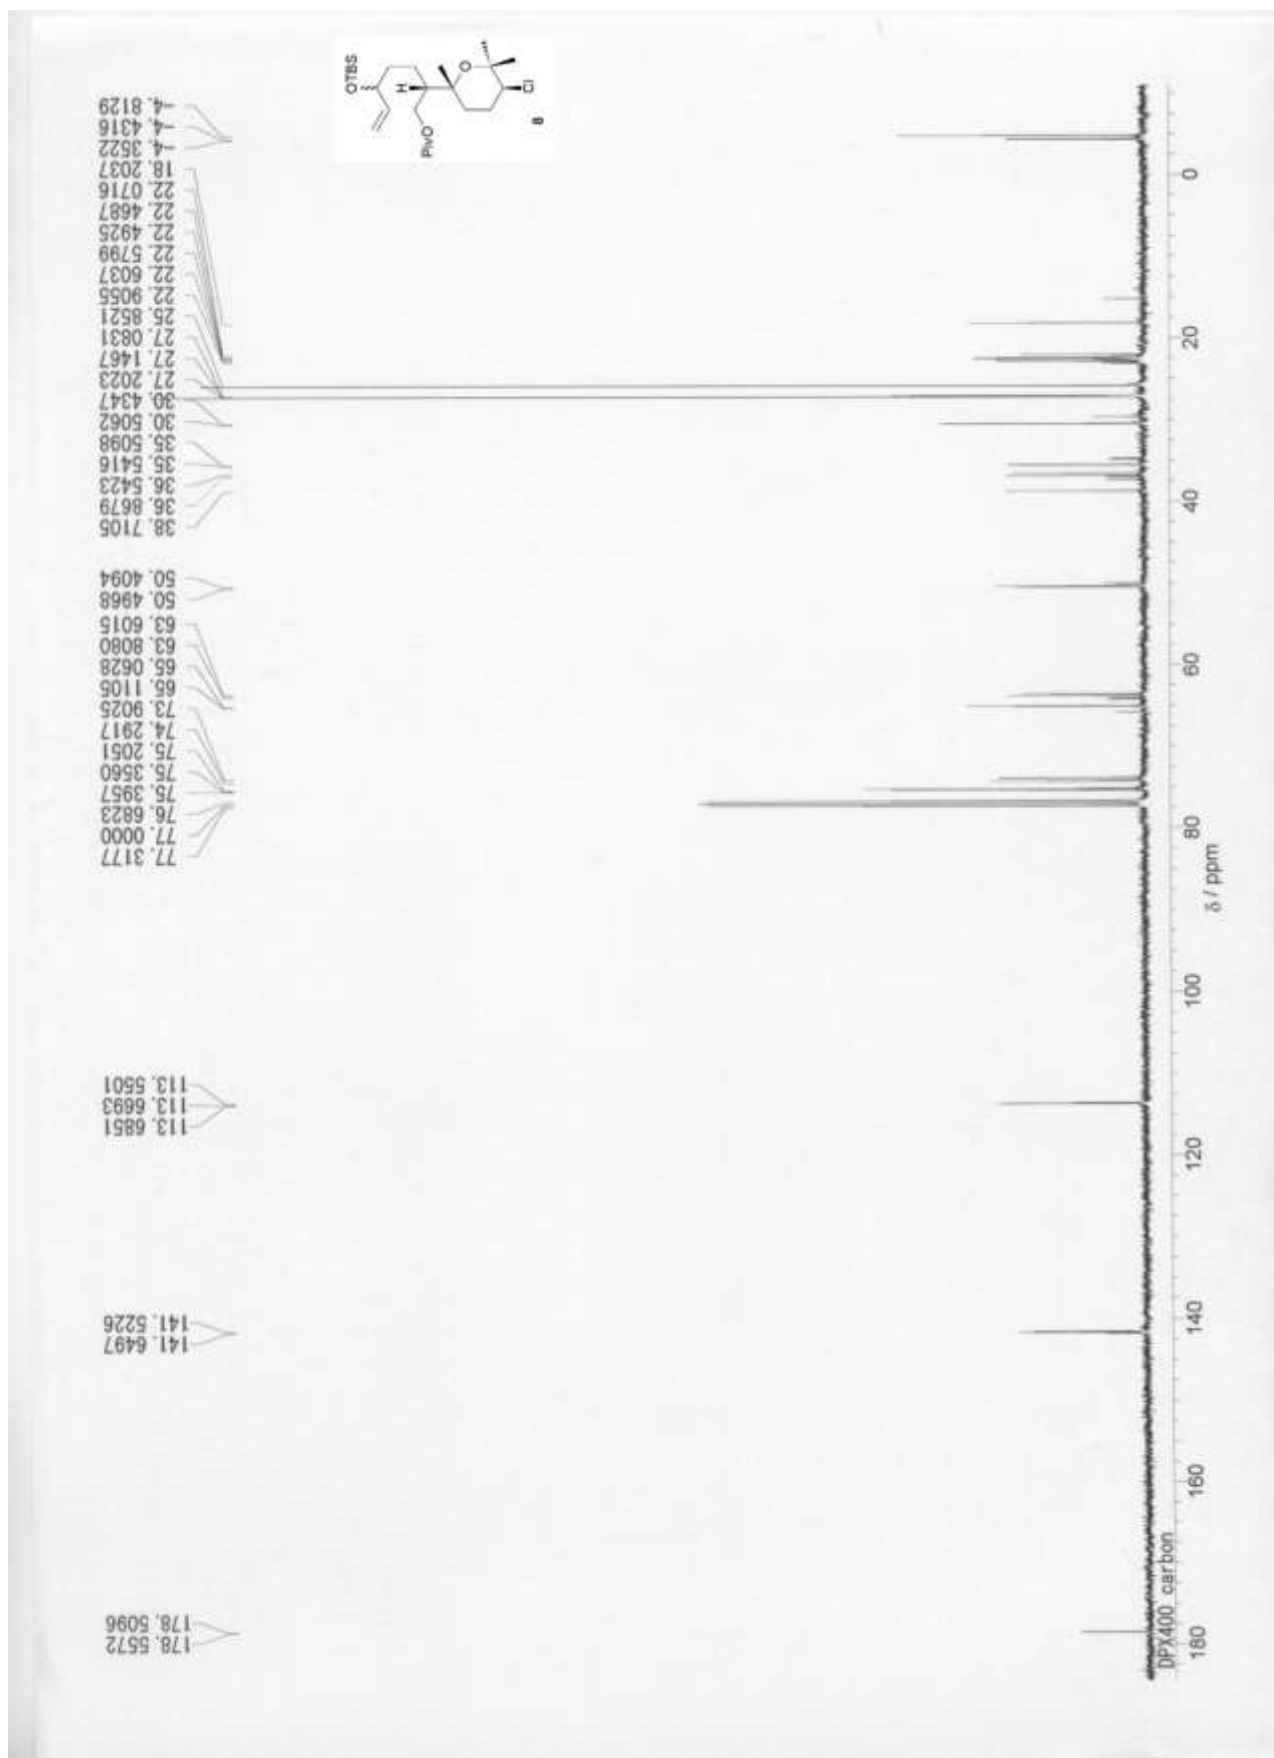

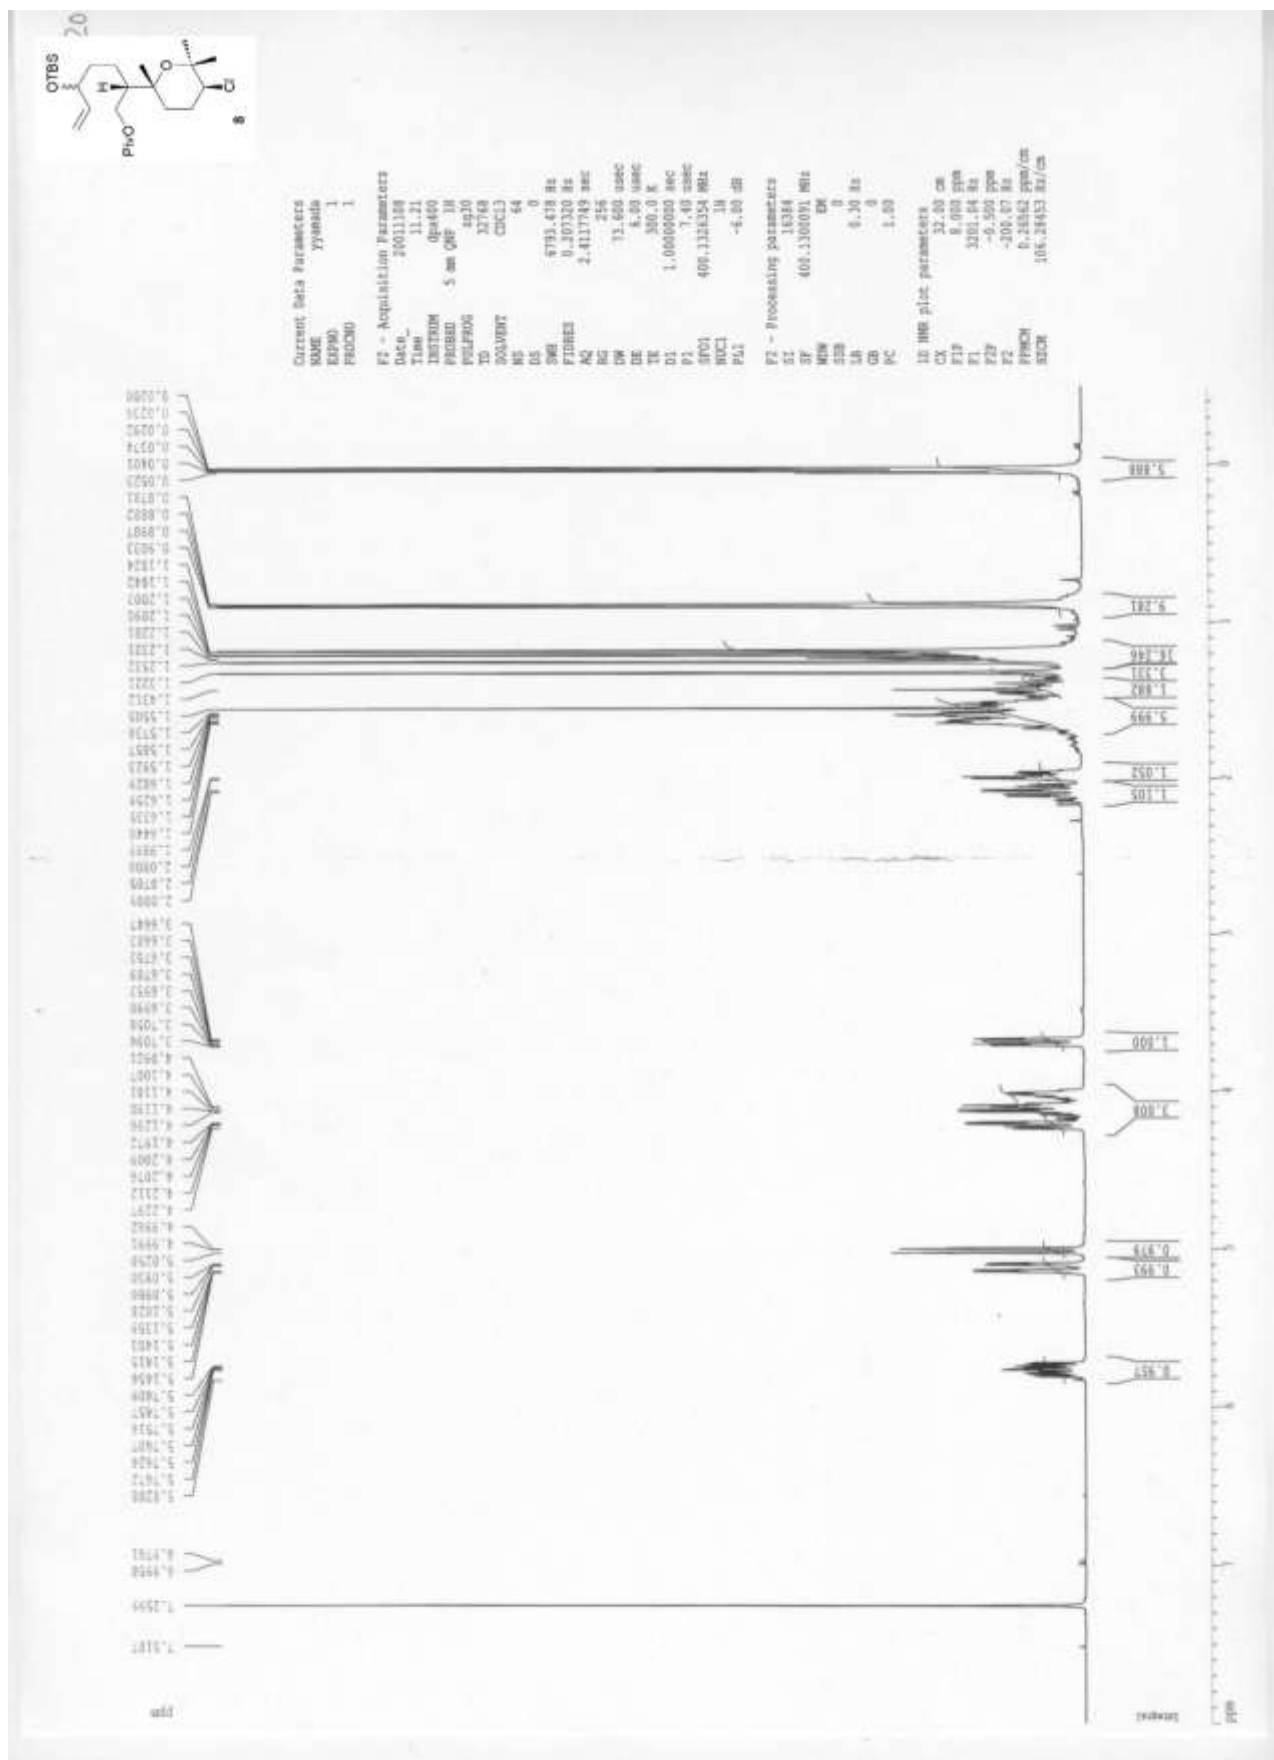

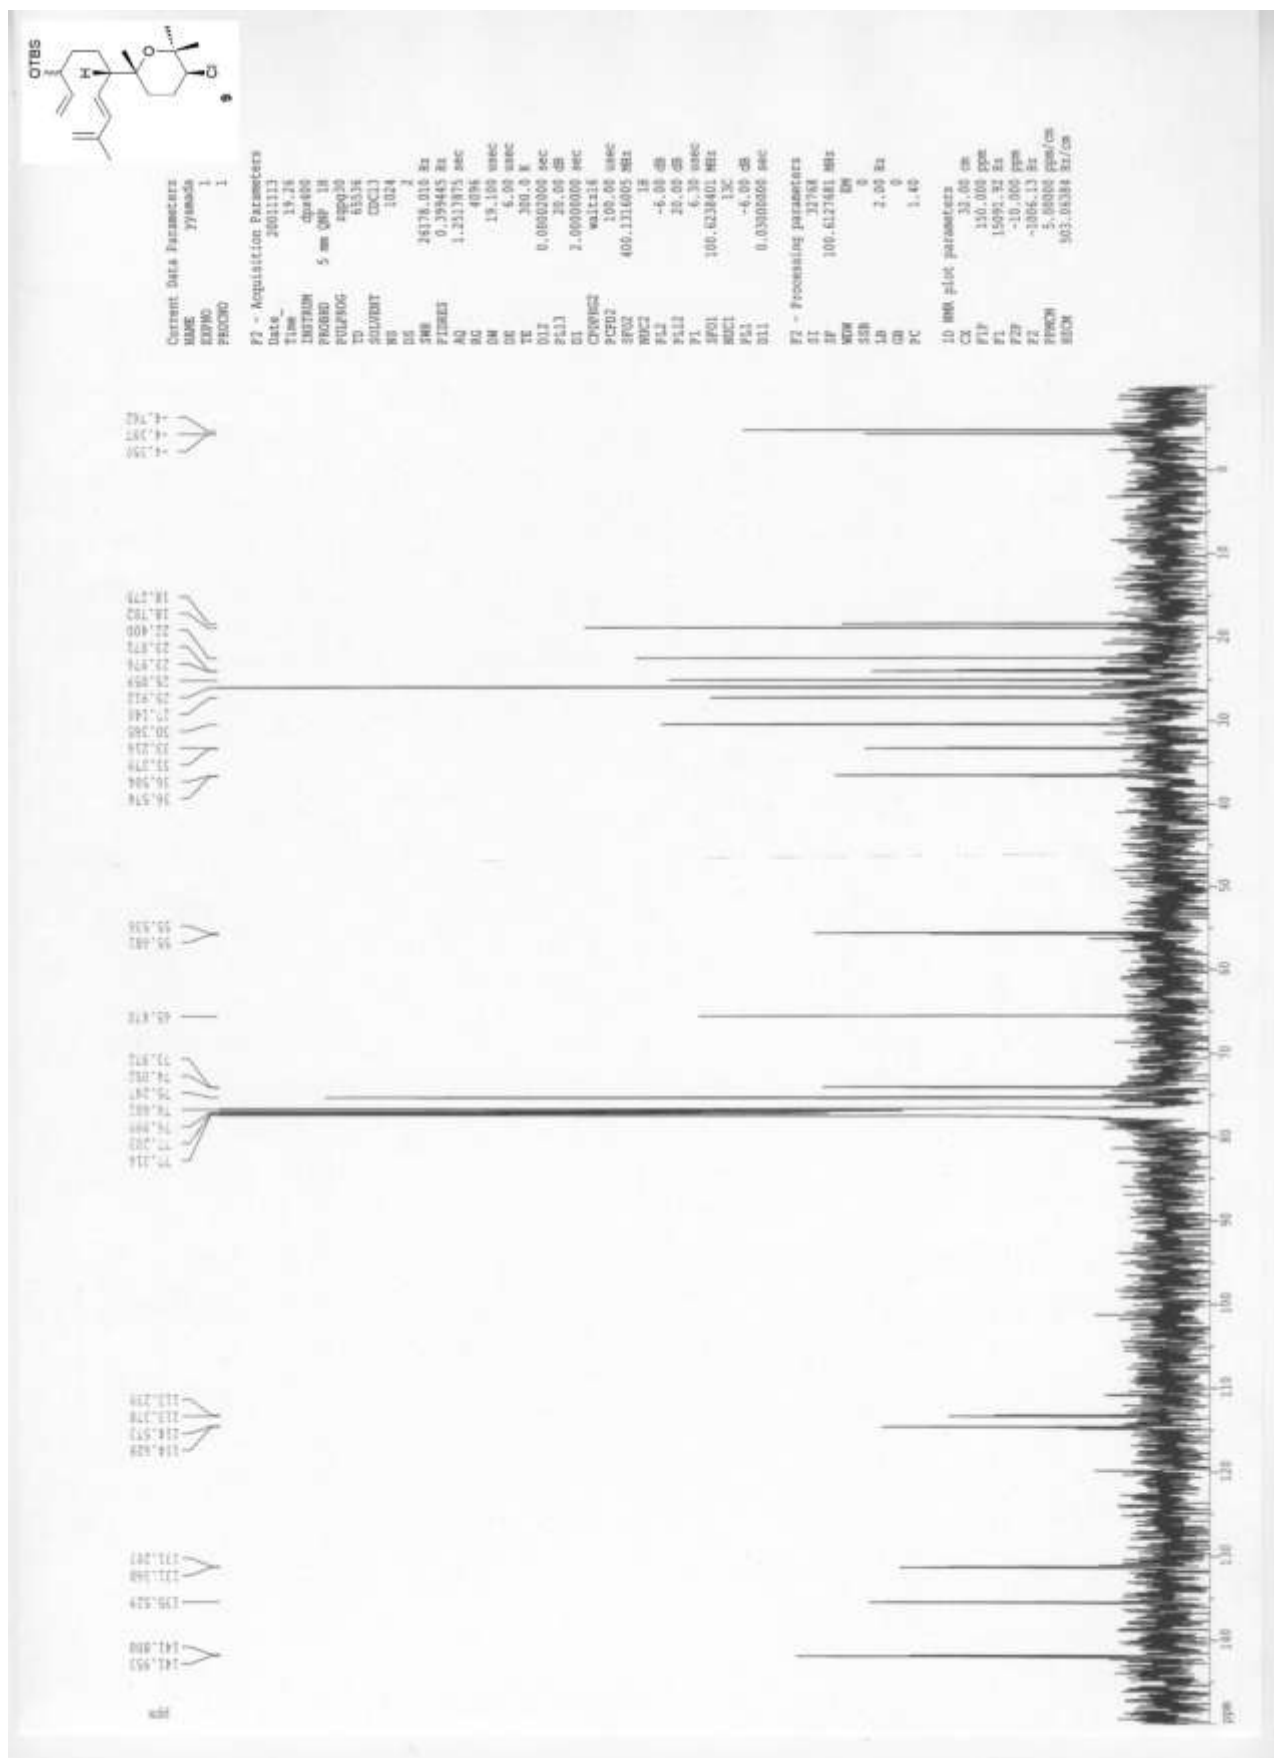

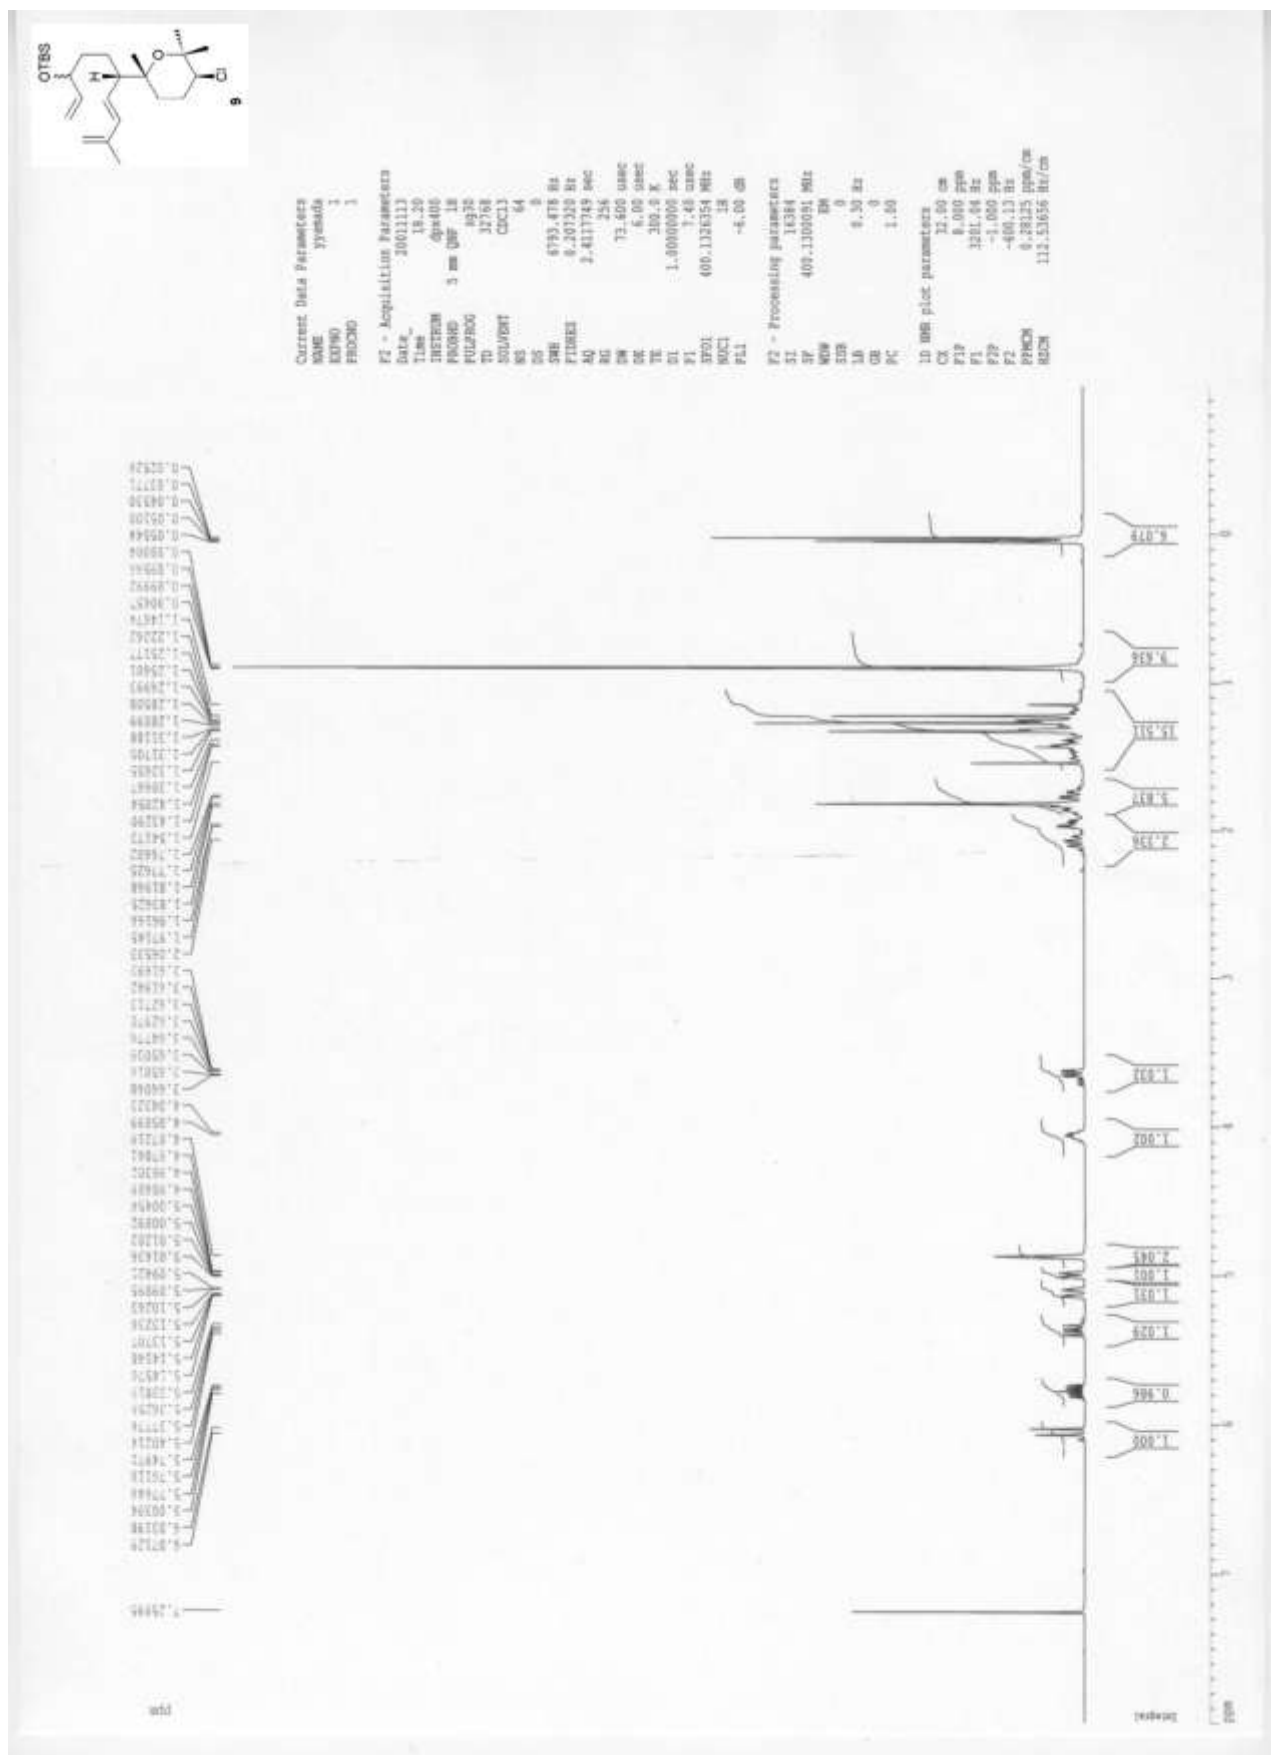

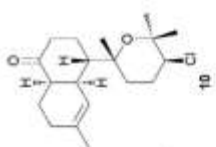

Current Data Parameters  
 NAME 10-3132  
 EXPNO 25  
 PROCNO 3

FE - Acquisition Parameter

Date\_ 20010827  
 Time 14.35  
 INSTRUM spect  
 PULPROG zgpg30  
 TO 65936  
 SOLVENT CDCl3  
 NS 1024  
 DS 2  
 SWH 50303.031 Hz  
 FIDRES 0.463268 Hz  
 AQ 1.2613600 sec  
 RG 4096  
 DM 15.500 usec  
 DE 7.50 usec  
 TE 300.0 K  
 D1 2.0000000 sec  
 D2 6.0300000 sec  
 D3 6.00002000 sec

\*\*\*\*\* CHANNEL f1 \*\*\*\*\*  
 NUC1 13C  
 P1 7.20 usec  
 PL1 -6.00 dB  
 SF01 125.7673900 MHz

\*\*\*\*\* CHANNEL f2 \*\*\*\*\*  
 CPDPRG2 waltz16  
 NUC2 1H  
 P2 98.00 usec  
 PL2 19.00 dB  
 PL12 19.00 dB  
 PL13 19.00 dB  
 SF02 500.1350005 MHz

F2 - Processing parameters  
 SI 32768  
 SF 125.7673900 MHz  
 WOK EM  
 SSB 0  
 LB 2.00 Hz  
 GB 0  
 PC 1.40

1D NMR plot parameters  
 CA 30.00 cm  
 F1F 225.07100K  
 F2 21675.75 Hz  
 F3 0.00000K  
 F4 0.00 Hz  
 F5 6.457250000K  
 F6 1854.80623 Hz/cm

DRX500-1 01/8/28  
 13C HS-3-132/CDCl3

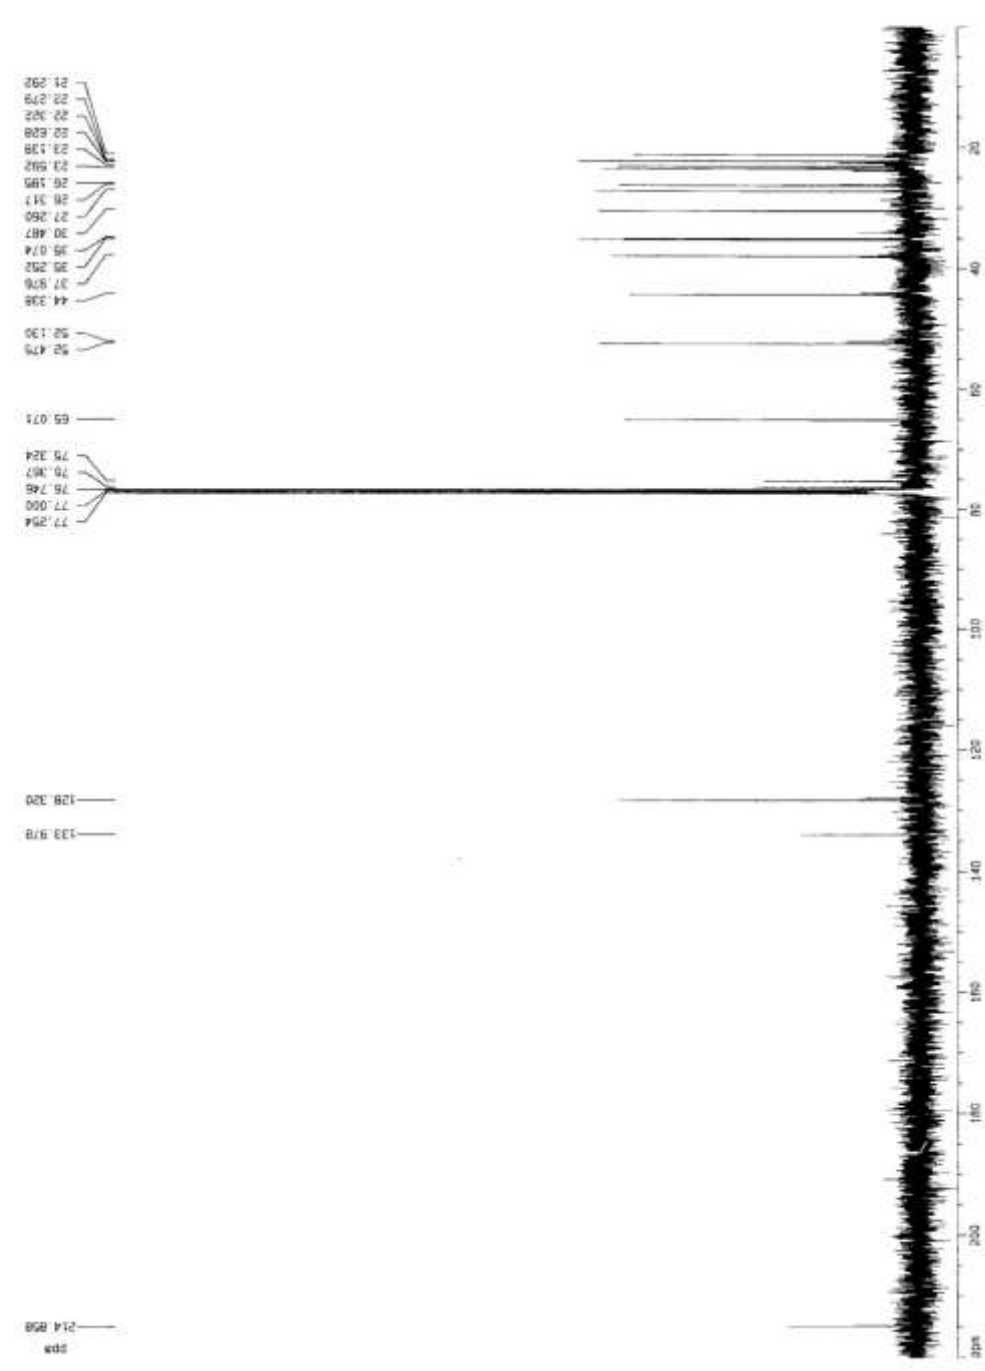

DPX500-1 01/B/2B  
 1H HS-3-132/CDC13

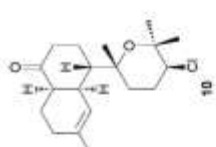

Current Data Parameters  
 NAME 01-3130  
 EXPNO 1  
 PROCNO 1

F2 - Acquisition Parameters  
 Date\_ 20010827  
 Time 13.14  
 INSTRUM dr500  
 PULPROG zgpg30  
 TO 32768  
 SOLVENT CDC13  
 NS 16  
 DS 2  
 SWH 8512.820 Hz  
 FIDRES 0.244633 Hz  
 AQ 2.0447731 sec  
 RG 64  
 DM 83.400 uS  
 DE 7.00 uS  
 TE 300.0 K  
 D1 1.0000000 sec

\*\*\*\*\* CHANNEL f1 \*\*\*\*\*  
 NUC1 1H  
 P1 4.70 uS  
 PL1 0.00 dB  
 SFO1 500.1330095 MHz

F2 - Processing parameters  
 SI 16384  
 SF 500.1330137 MHz  
 EQN 54  
 SSB 0  
 LB 0.30 Hz  
 GB 0  
 PC 1.00

10 MHz plot parameters  
 CX 32.00 cm  
 F1P 8.000 cps  
 F1 4001.04 Hz  
 F2P 0.000 cps  
 F2 0.00 Hz  
 PRNQ 0.25000 cps/cm  
 VIZON 120.03250 Hz/cm

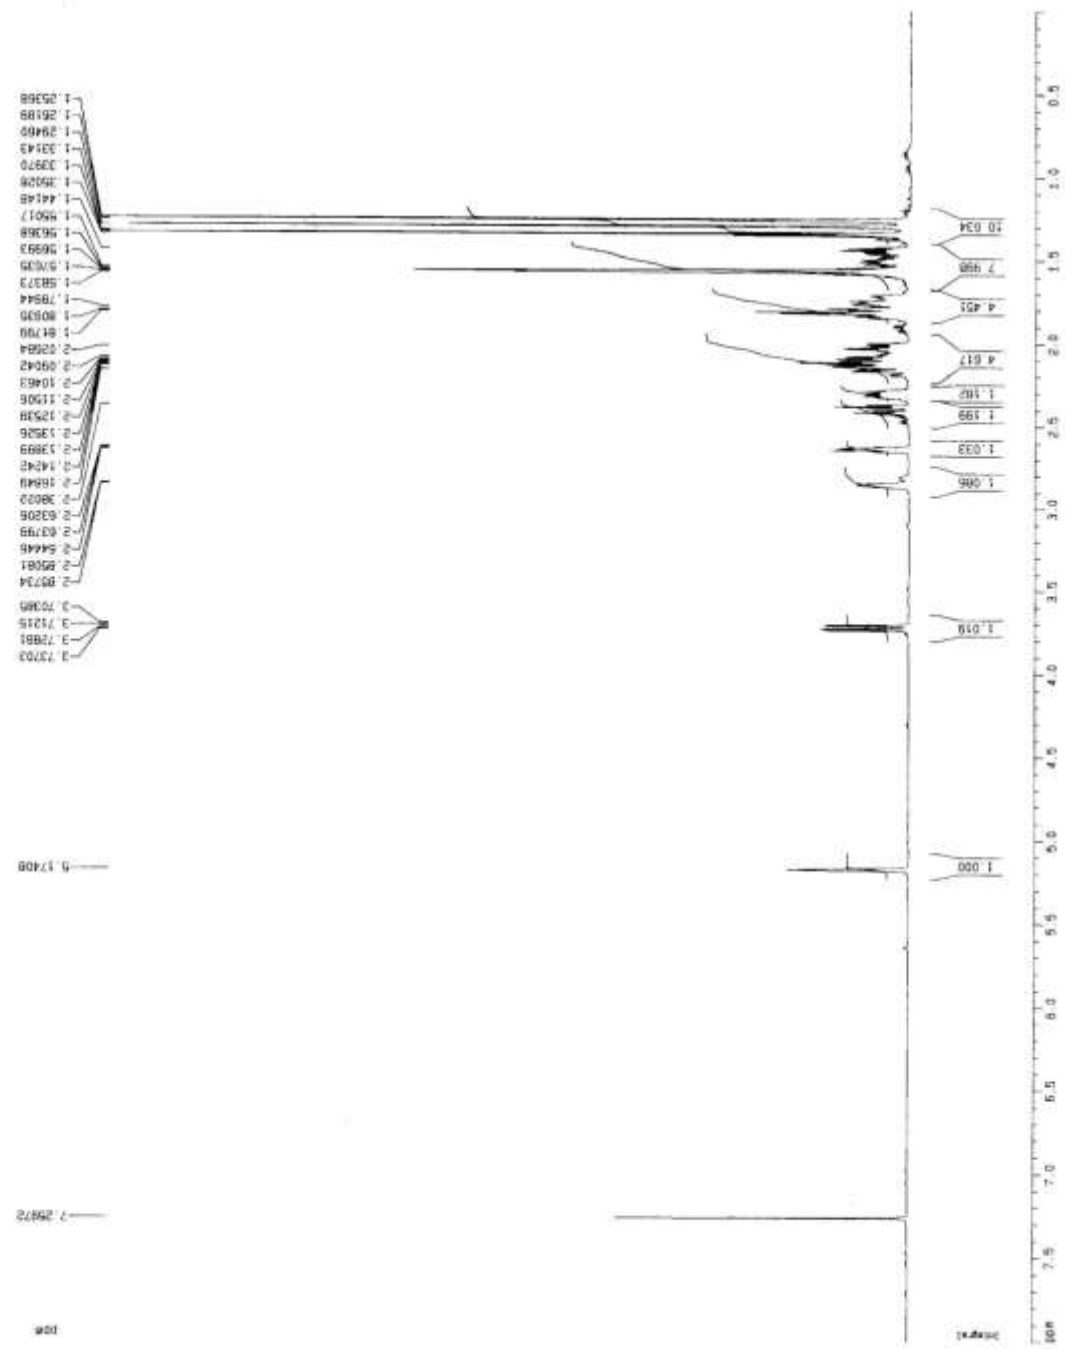

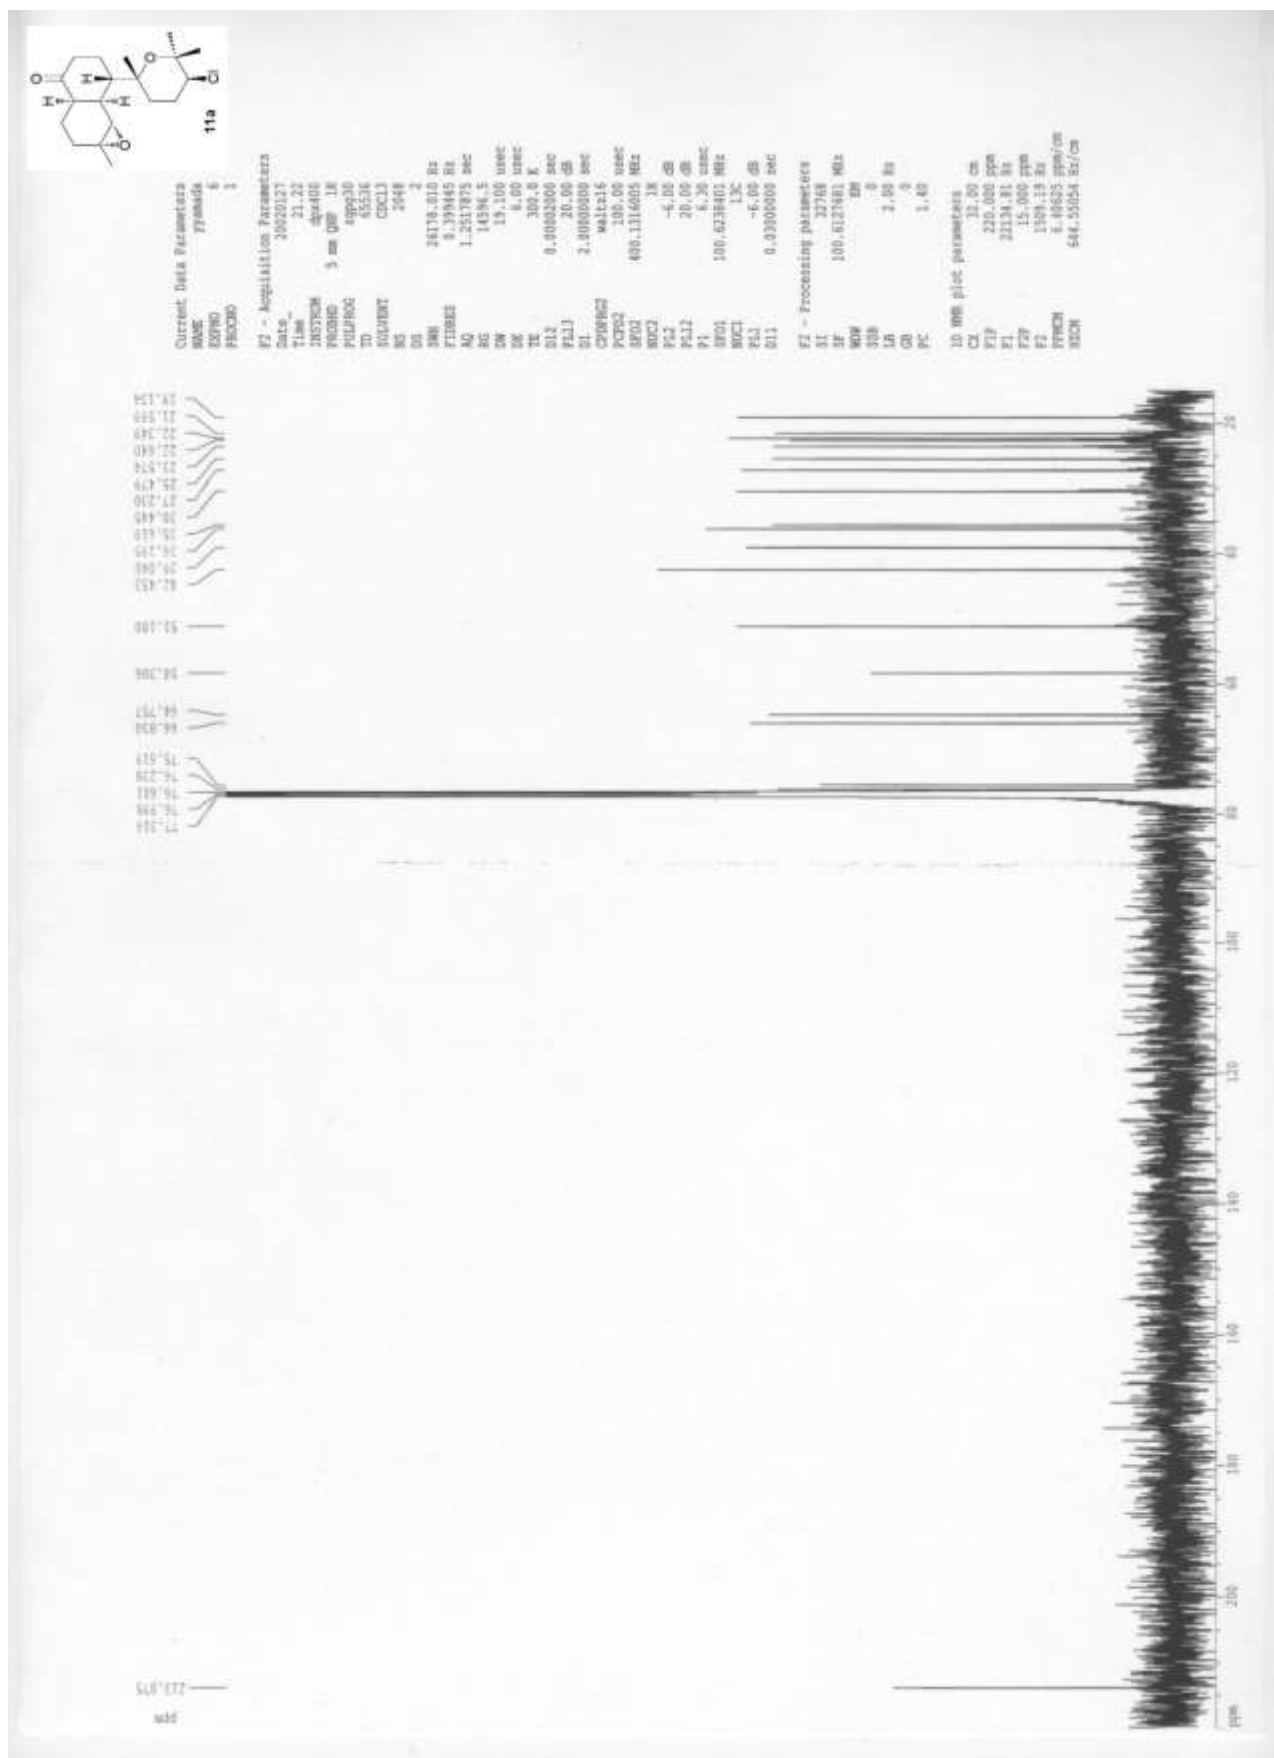

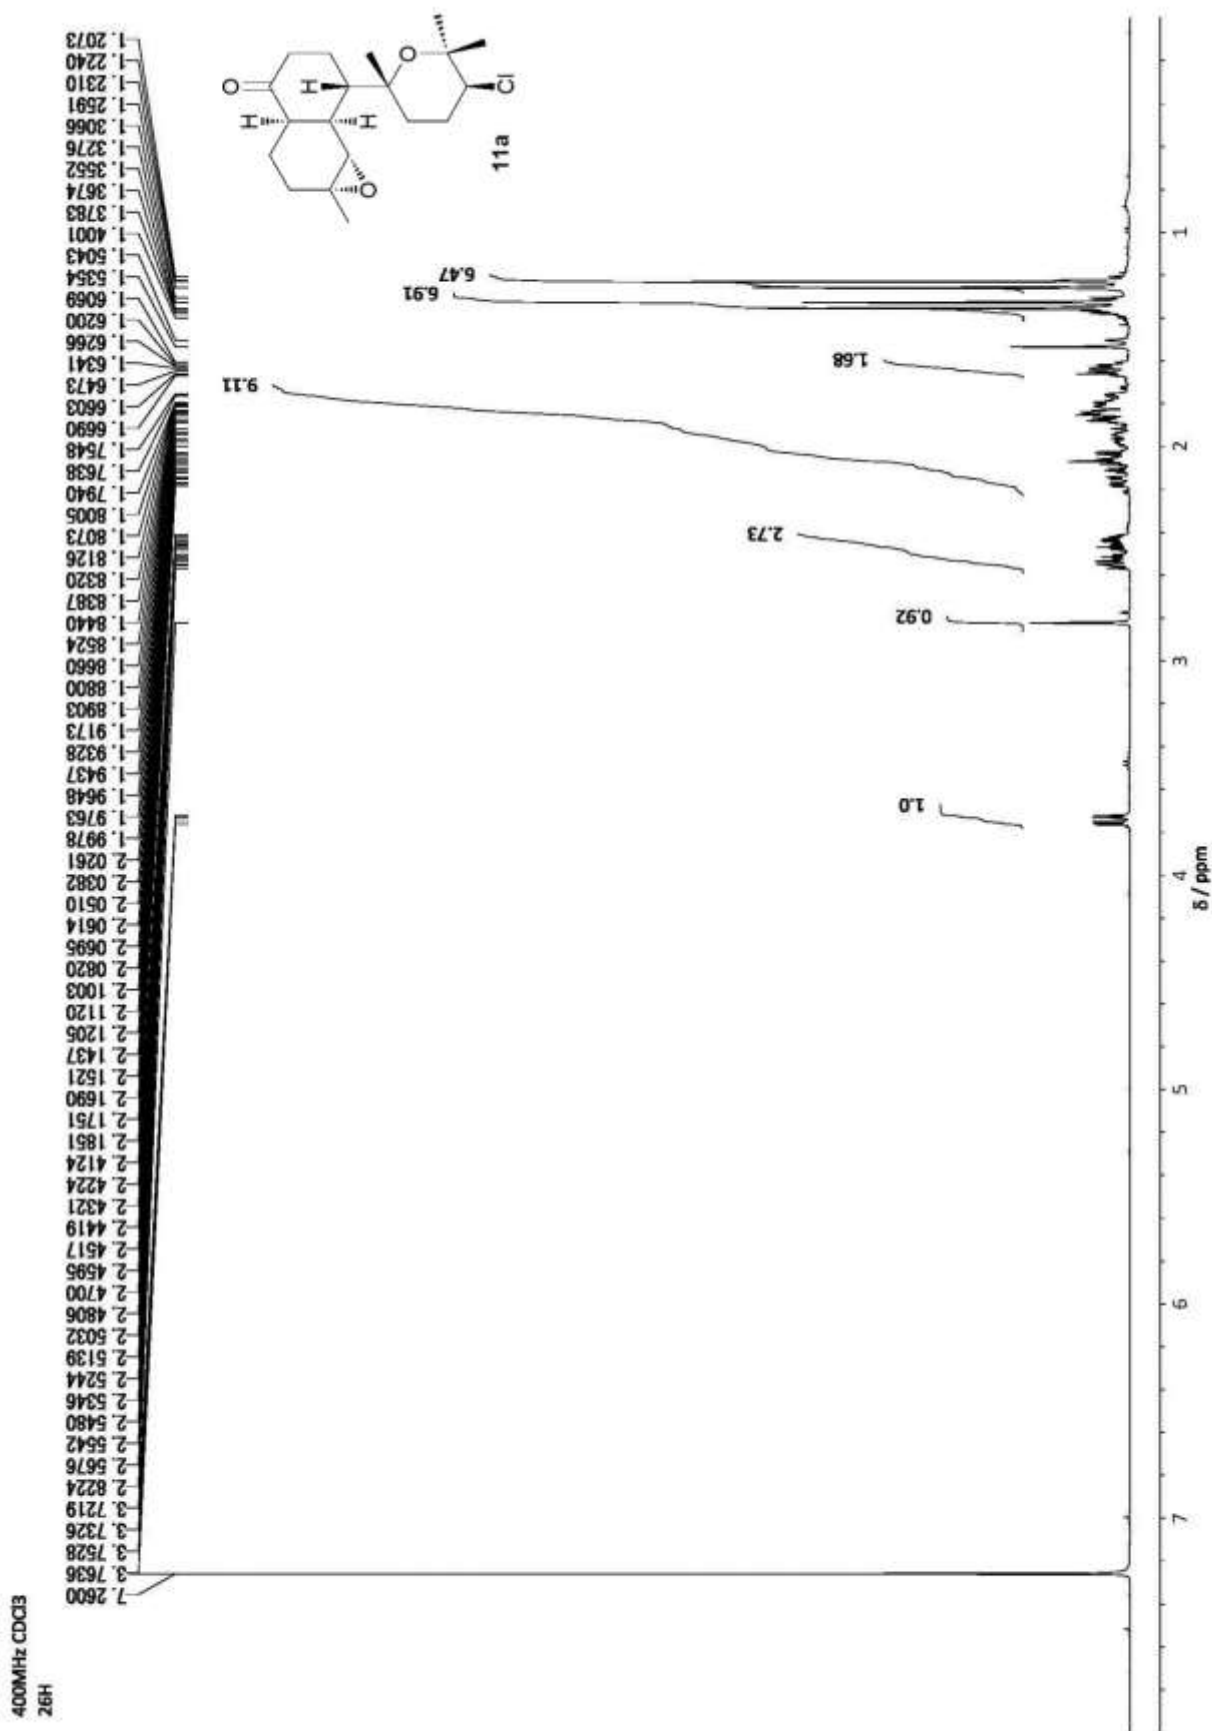





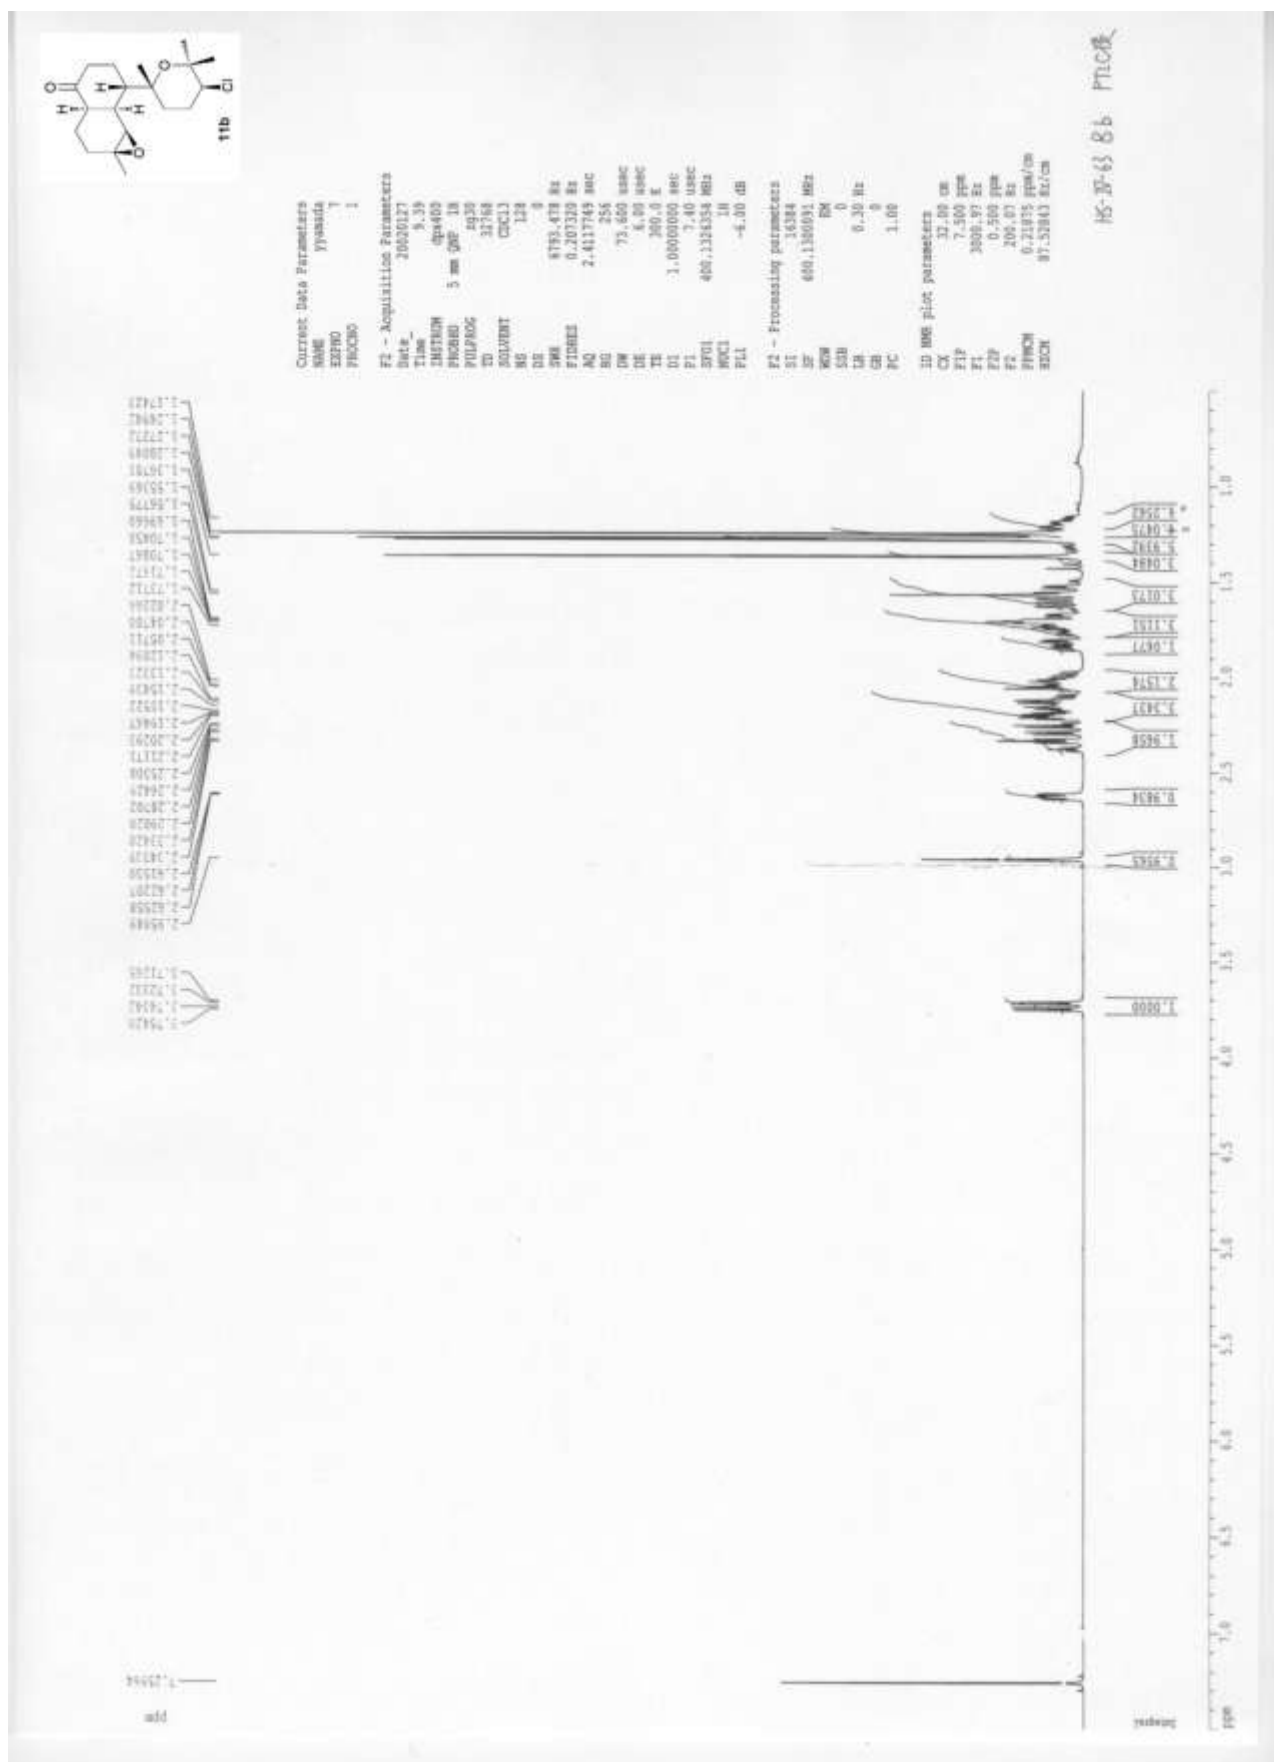

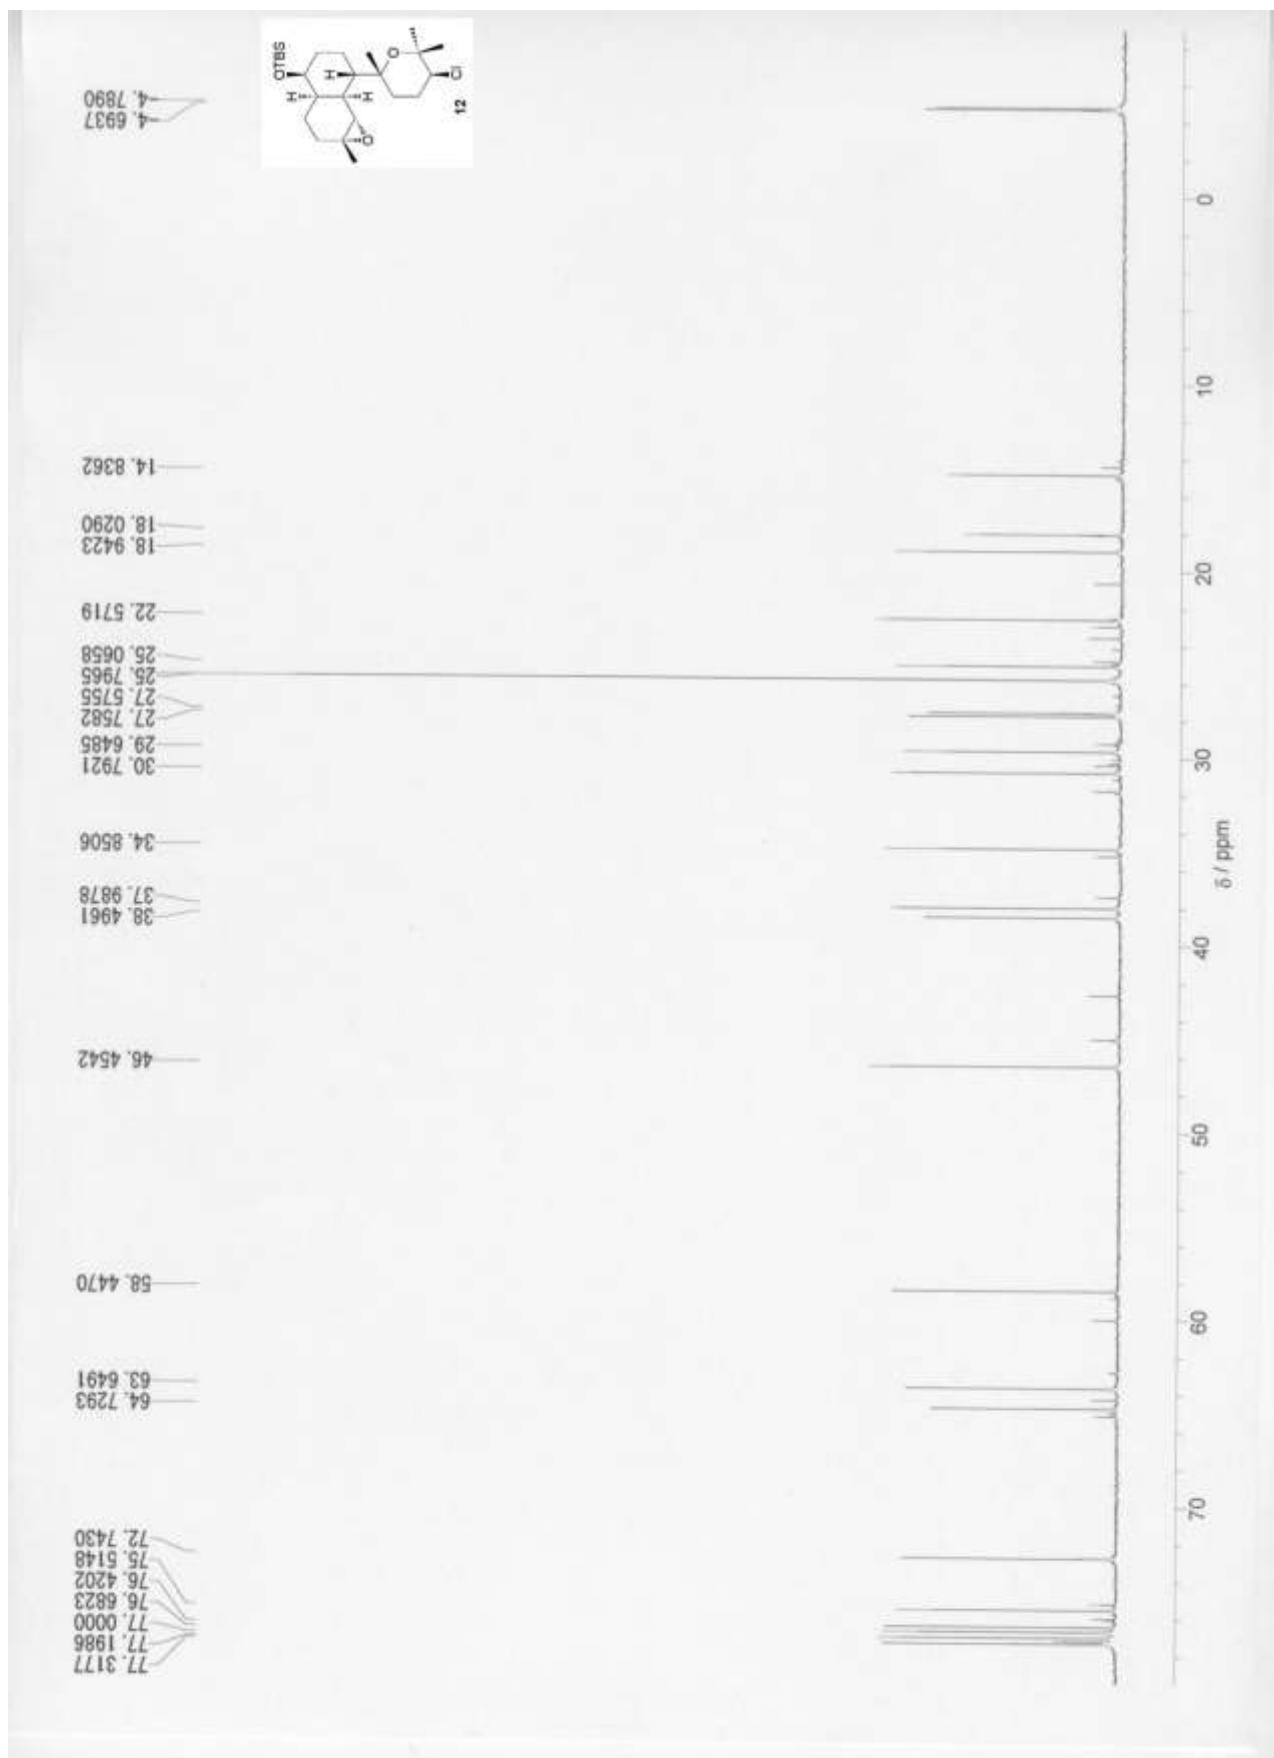

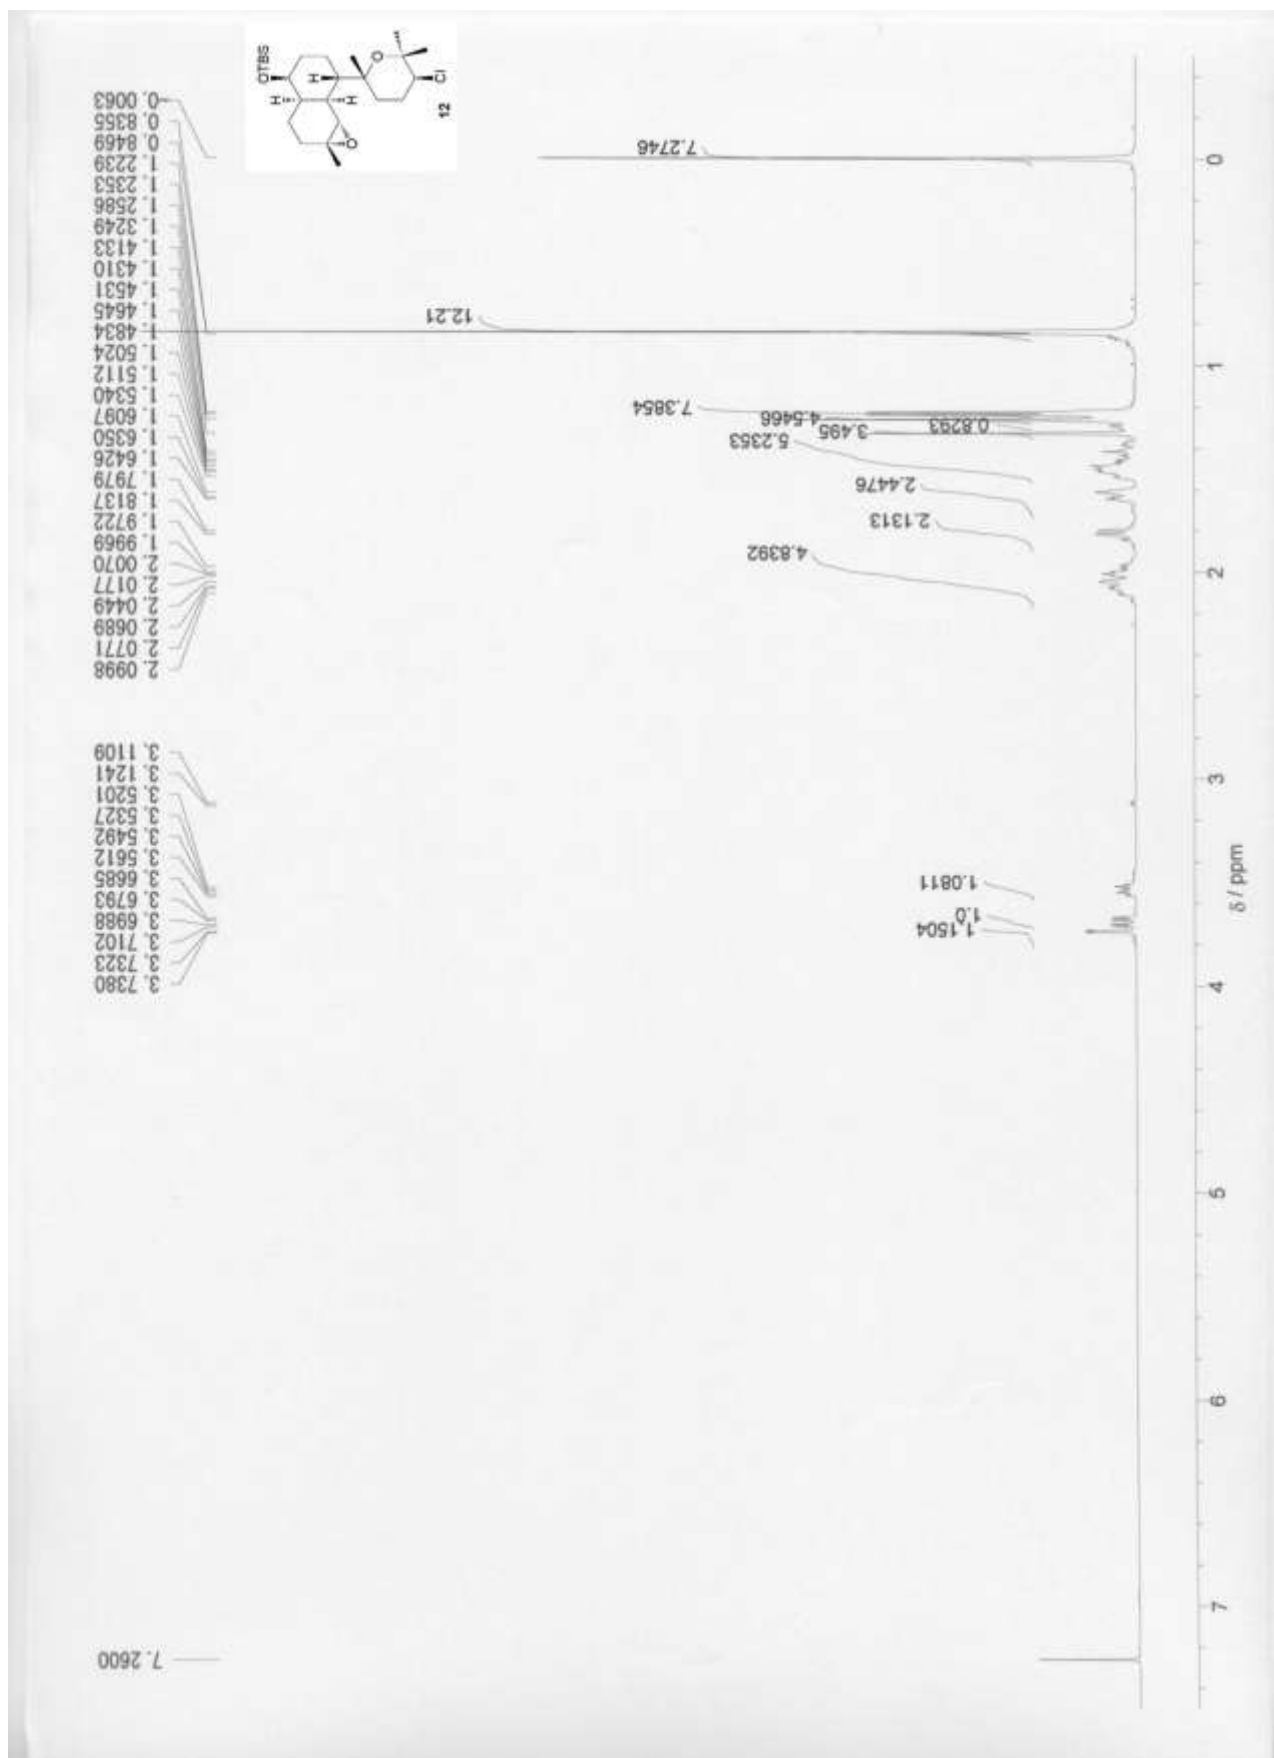

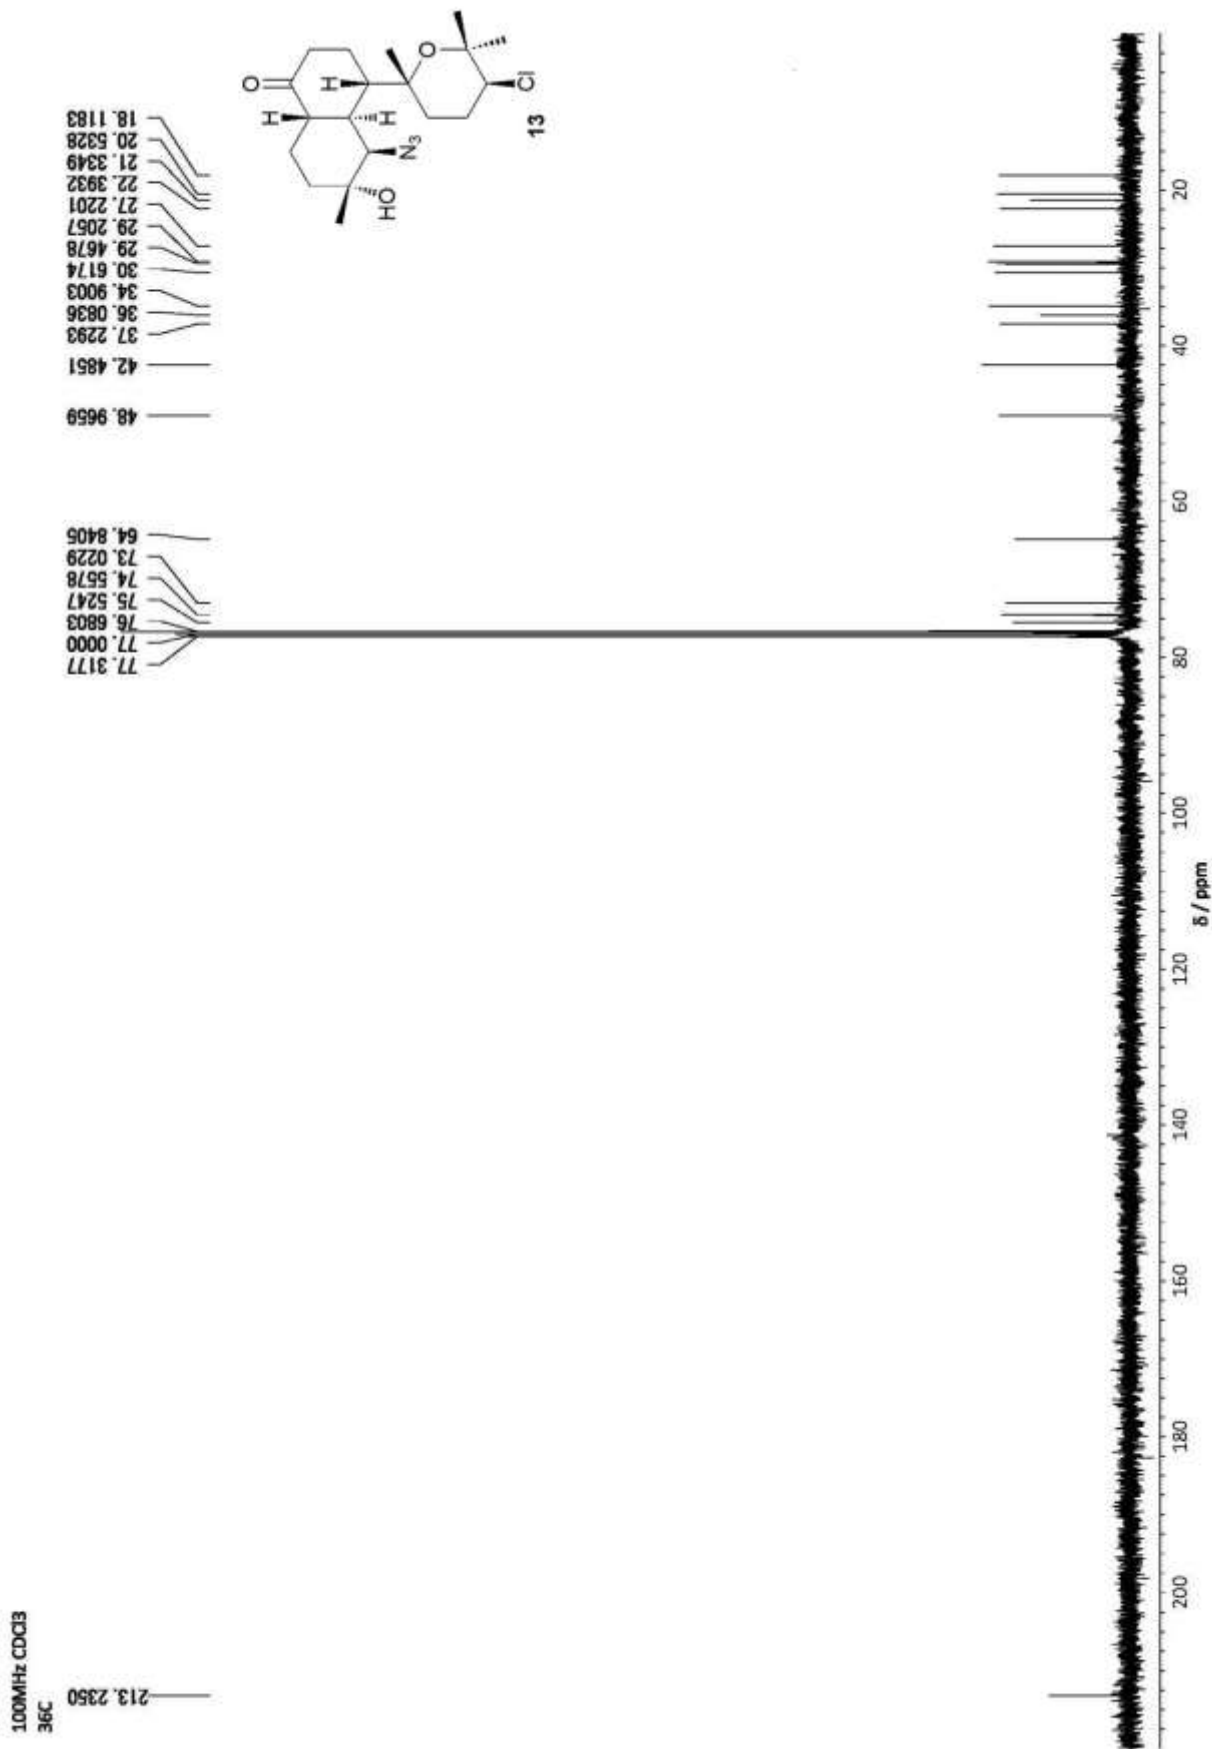

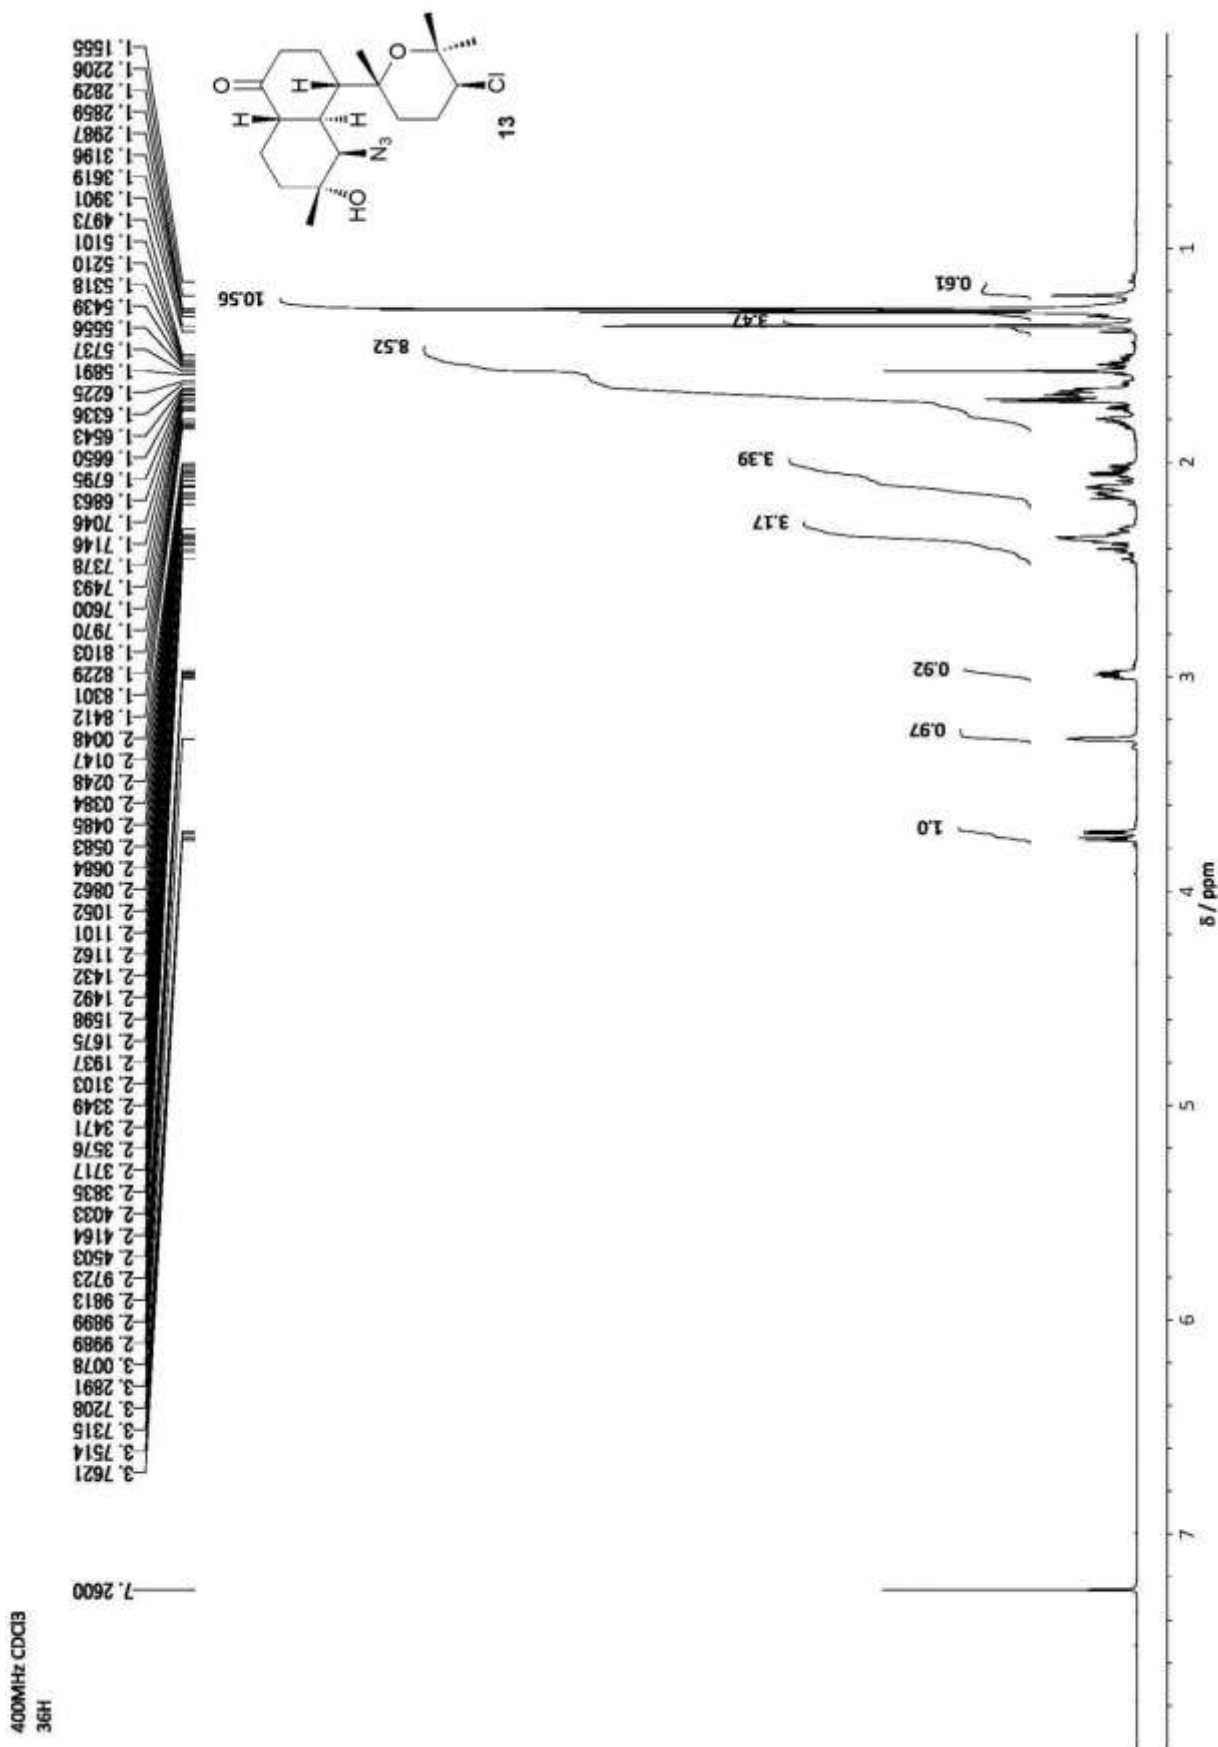

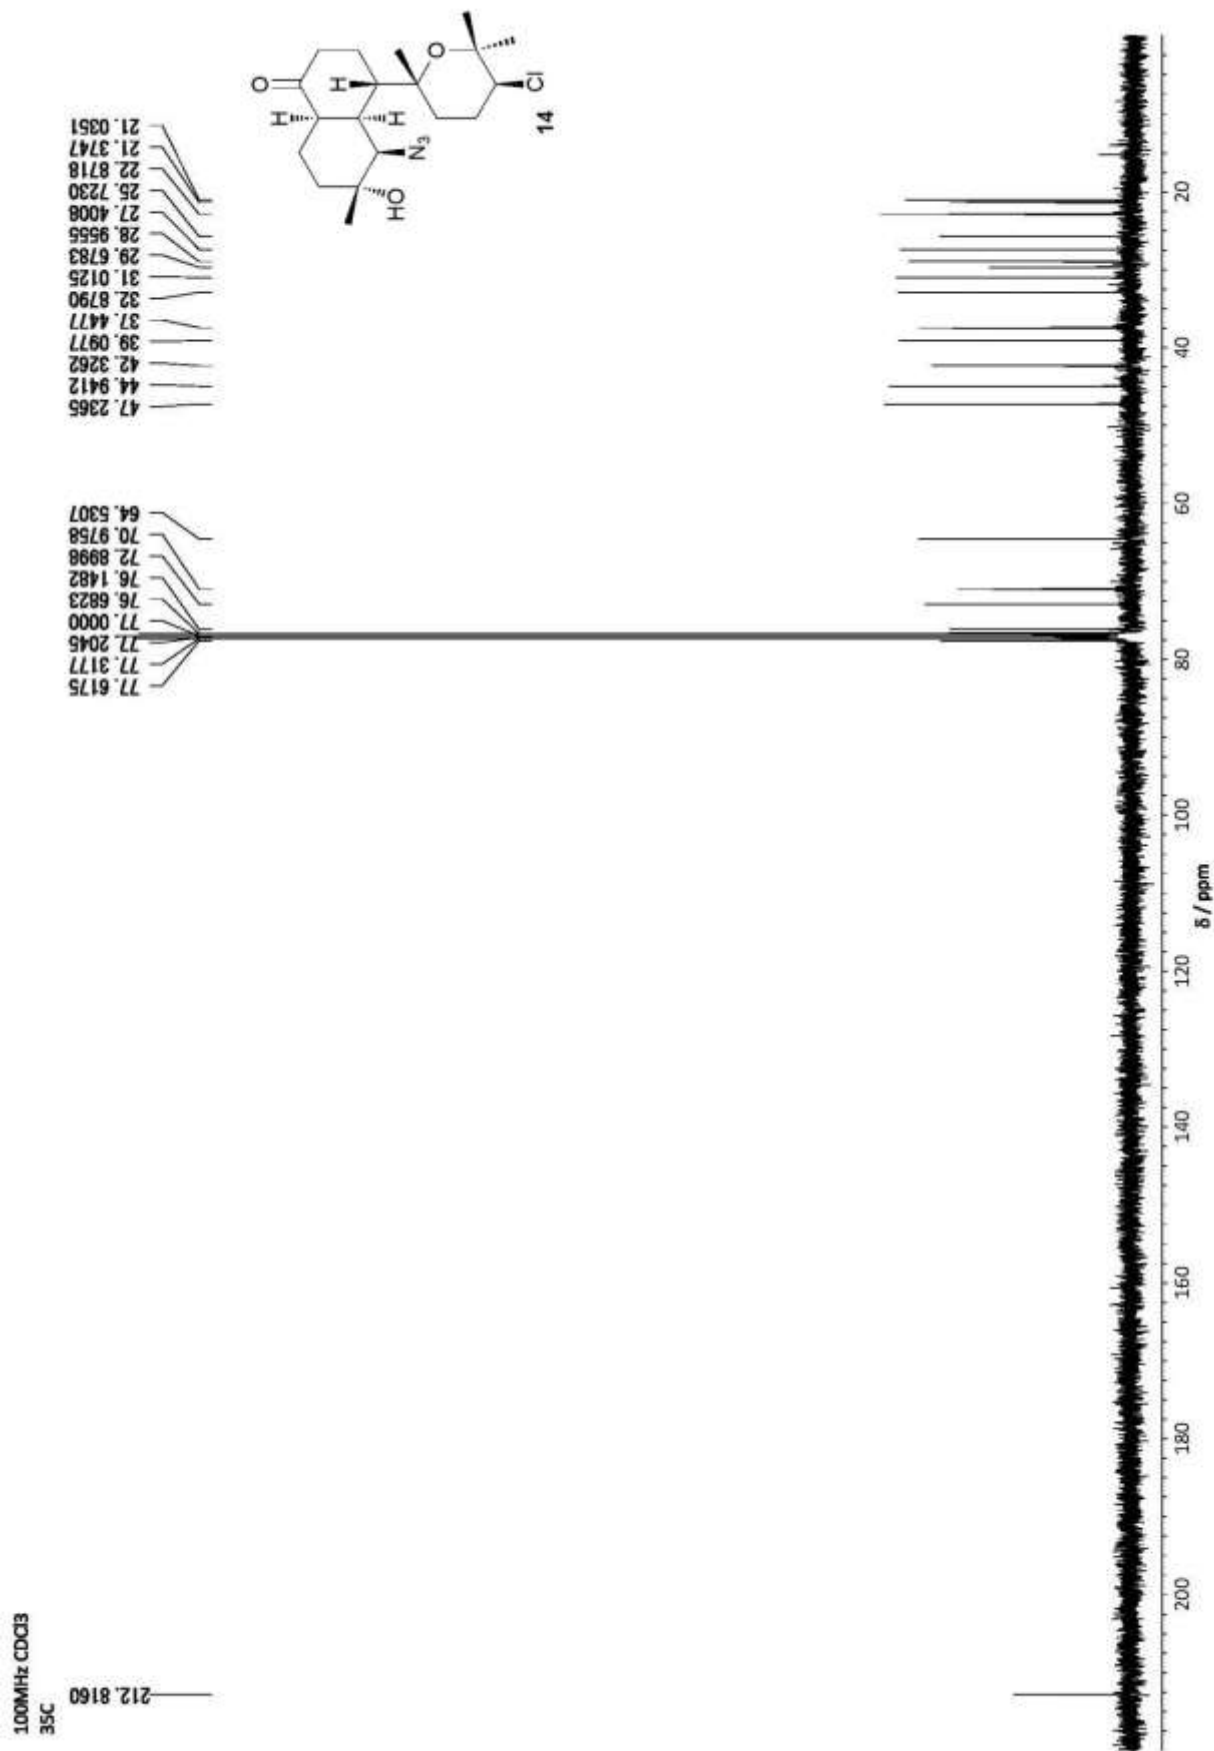

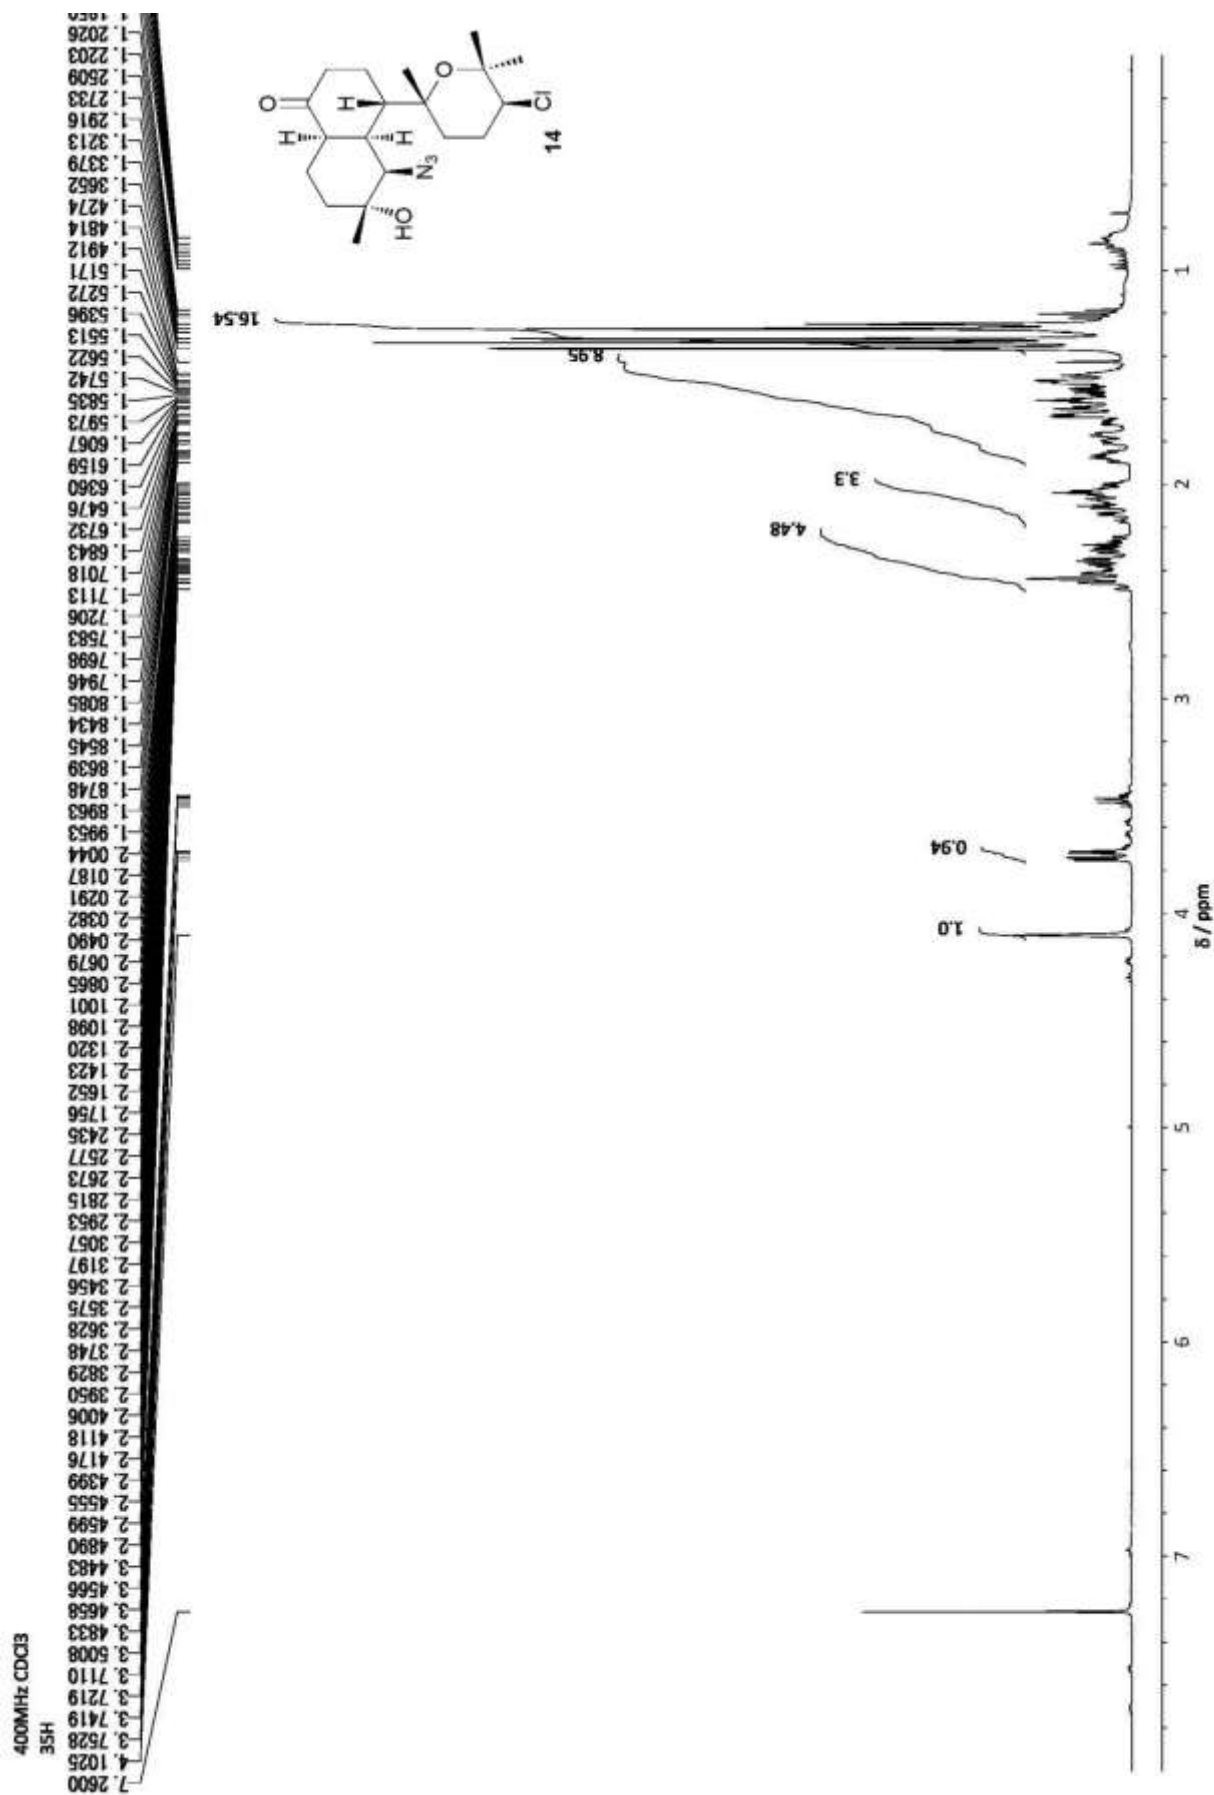



100MHz CDCl<sub>3</sub>  
37C

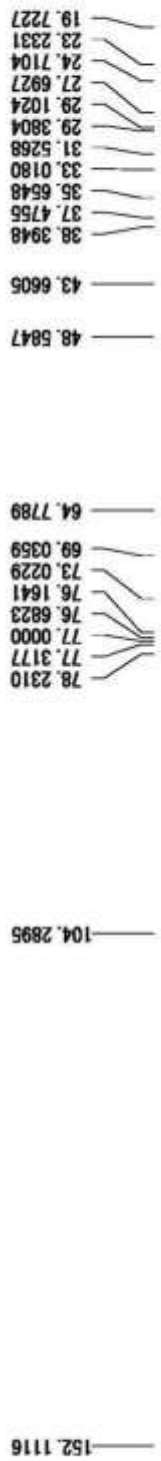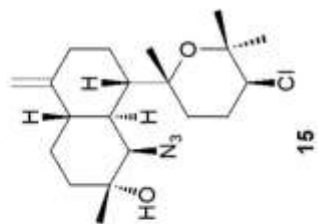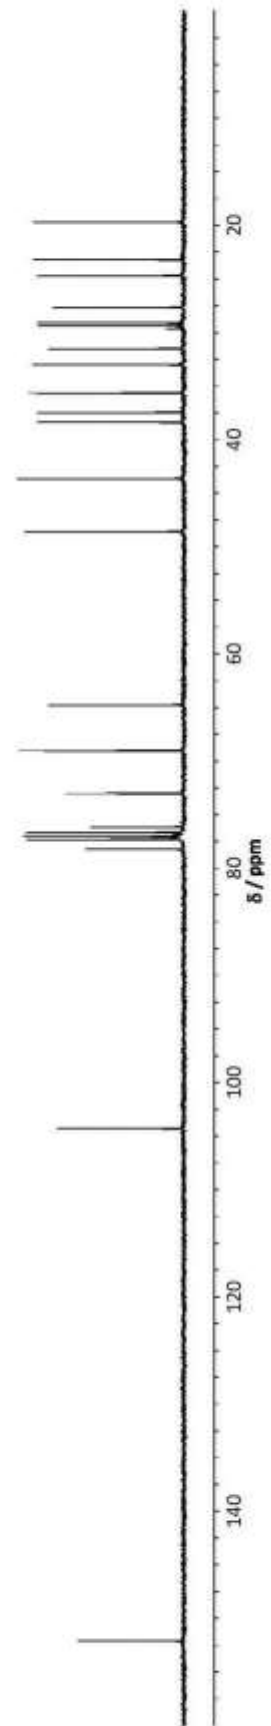

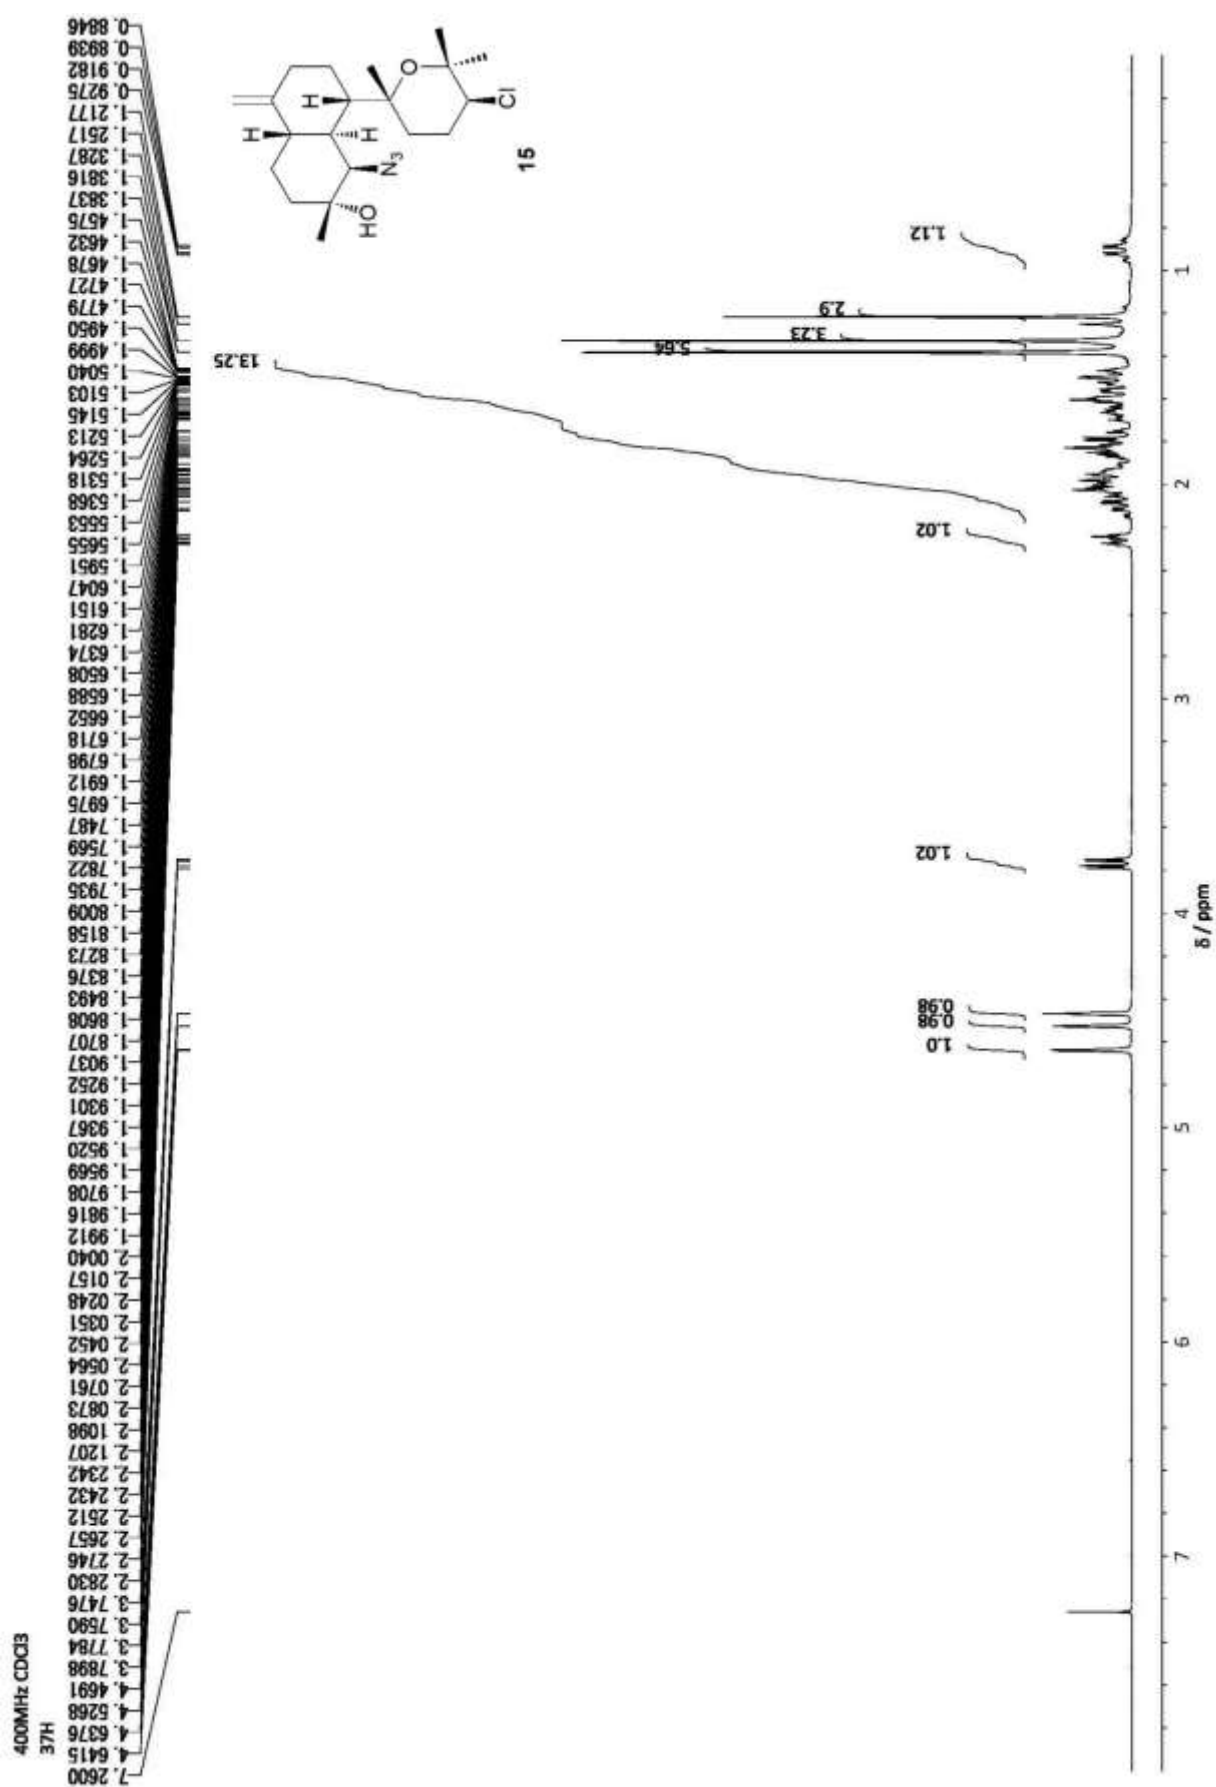

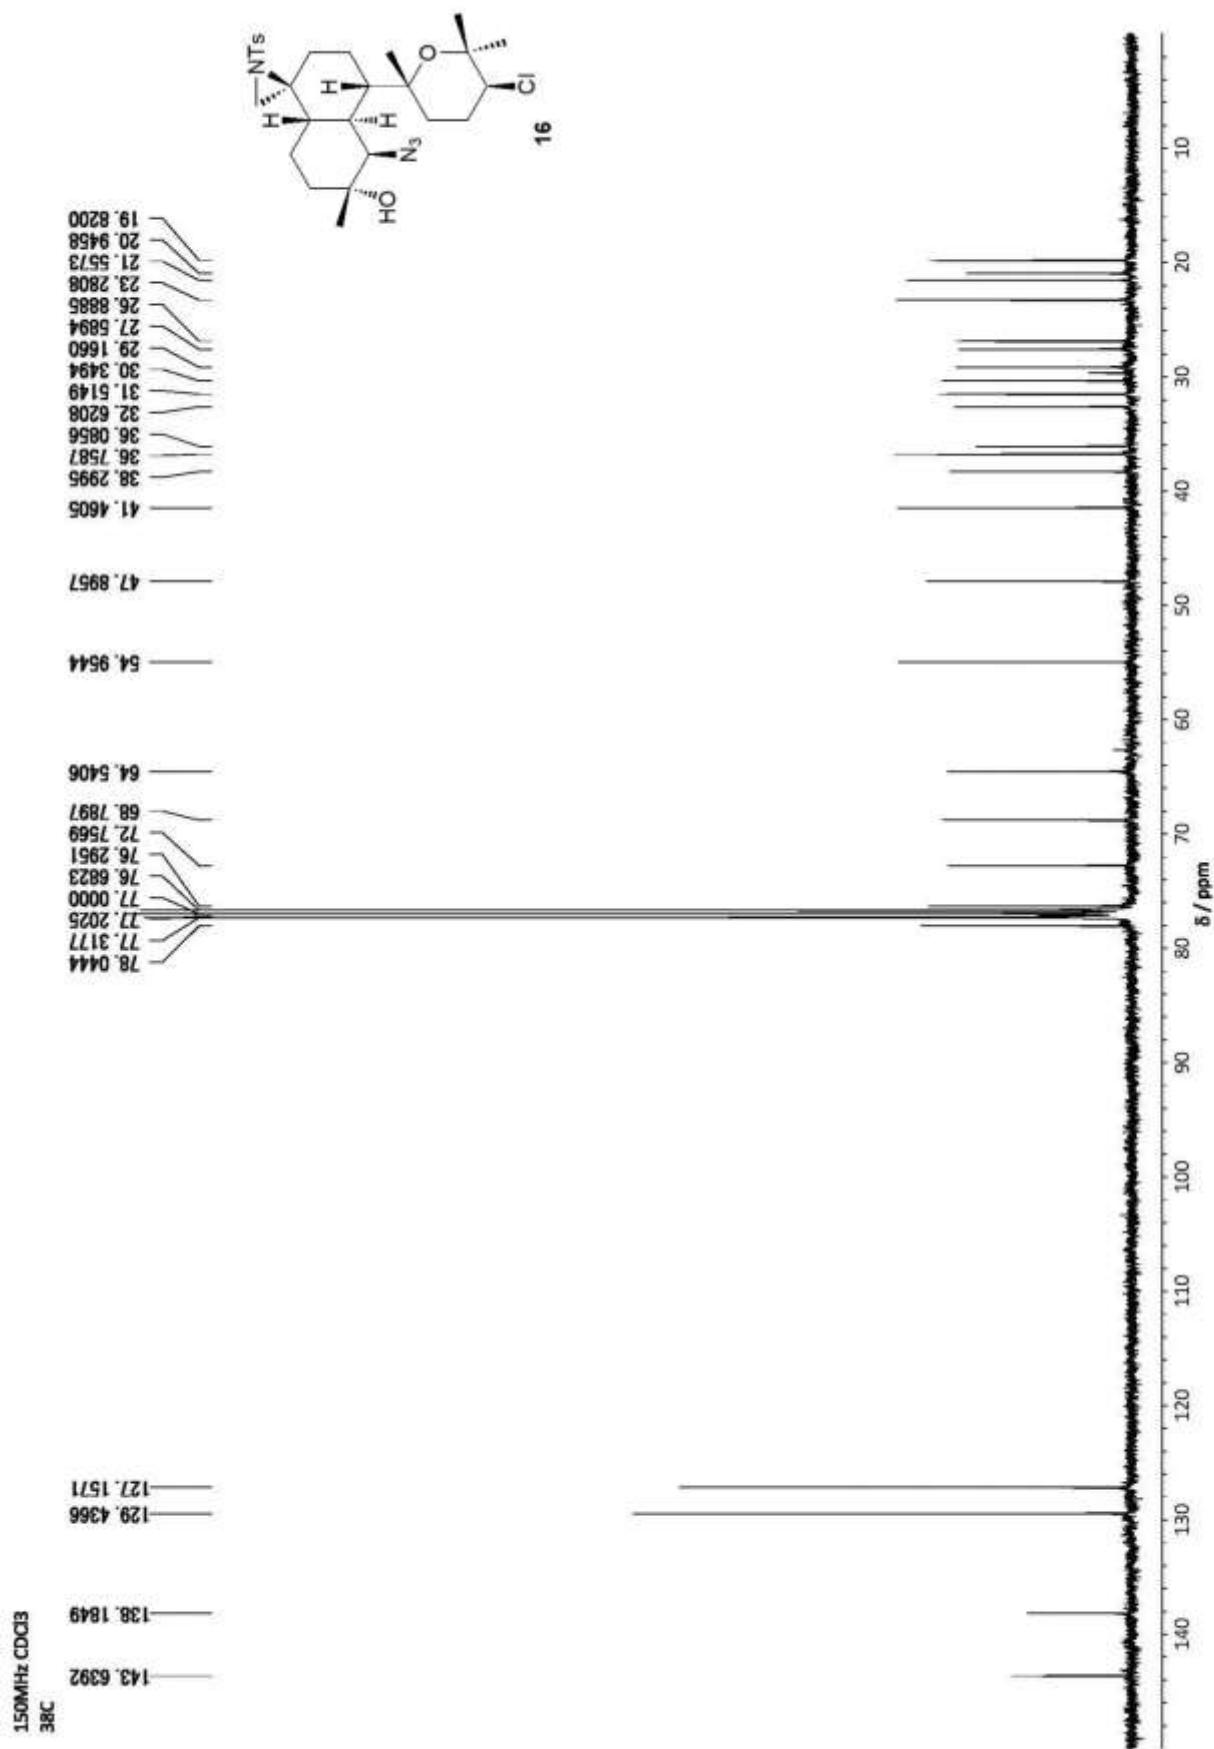

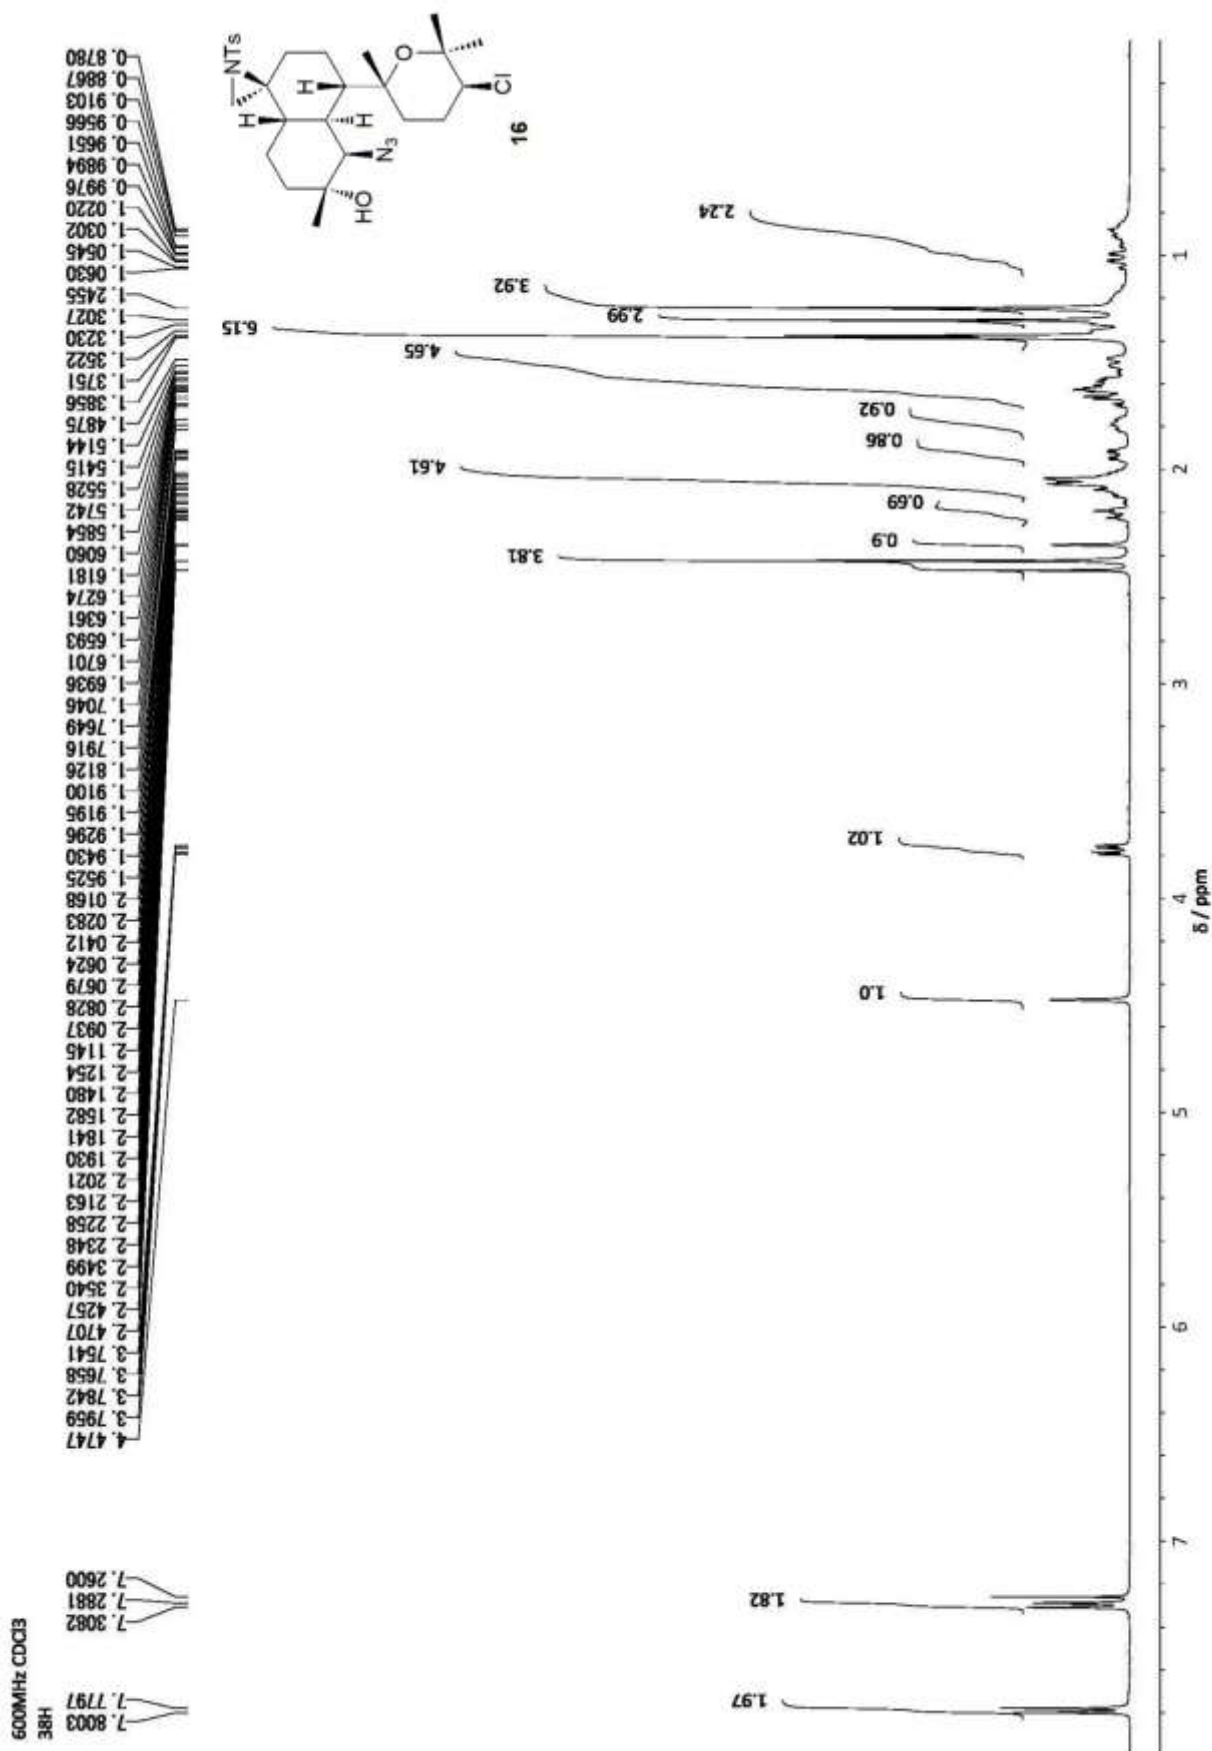

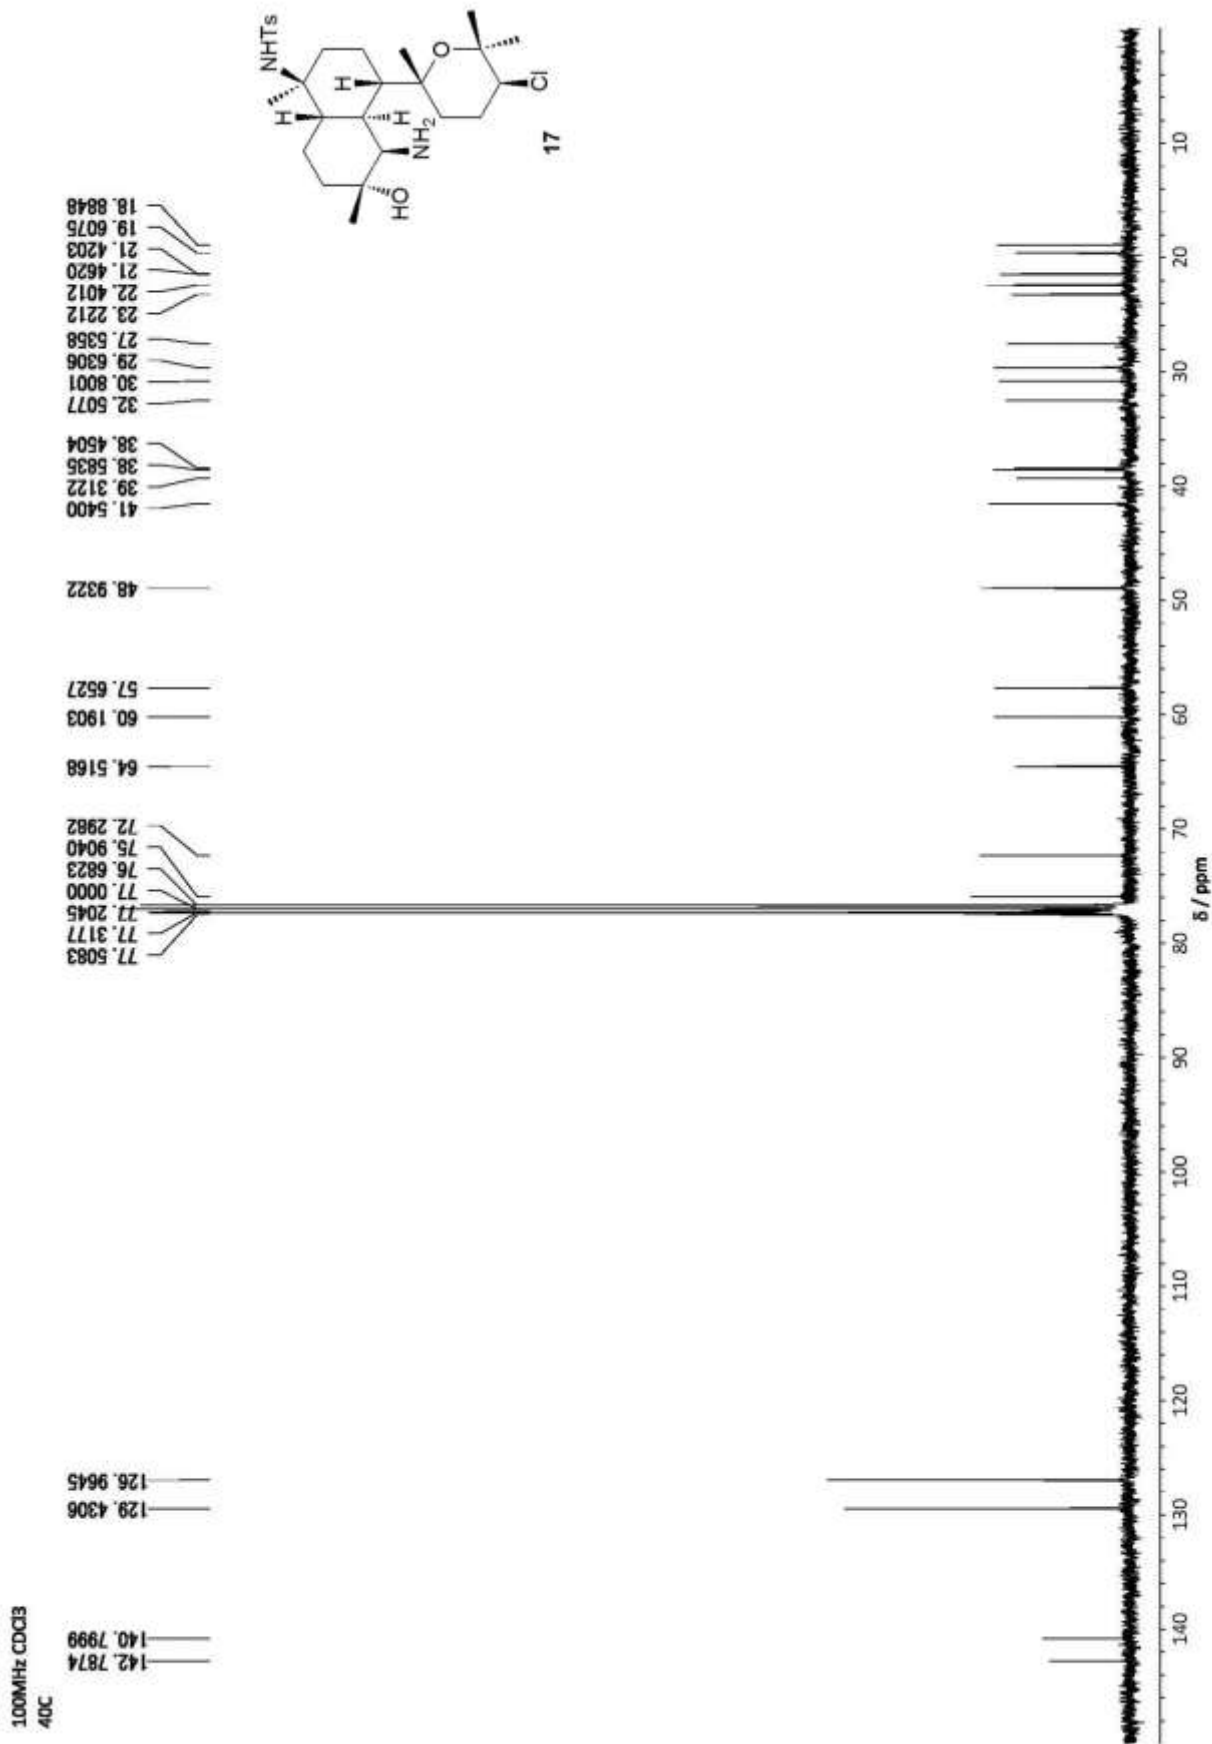

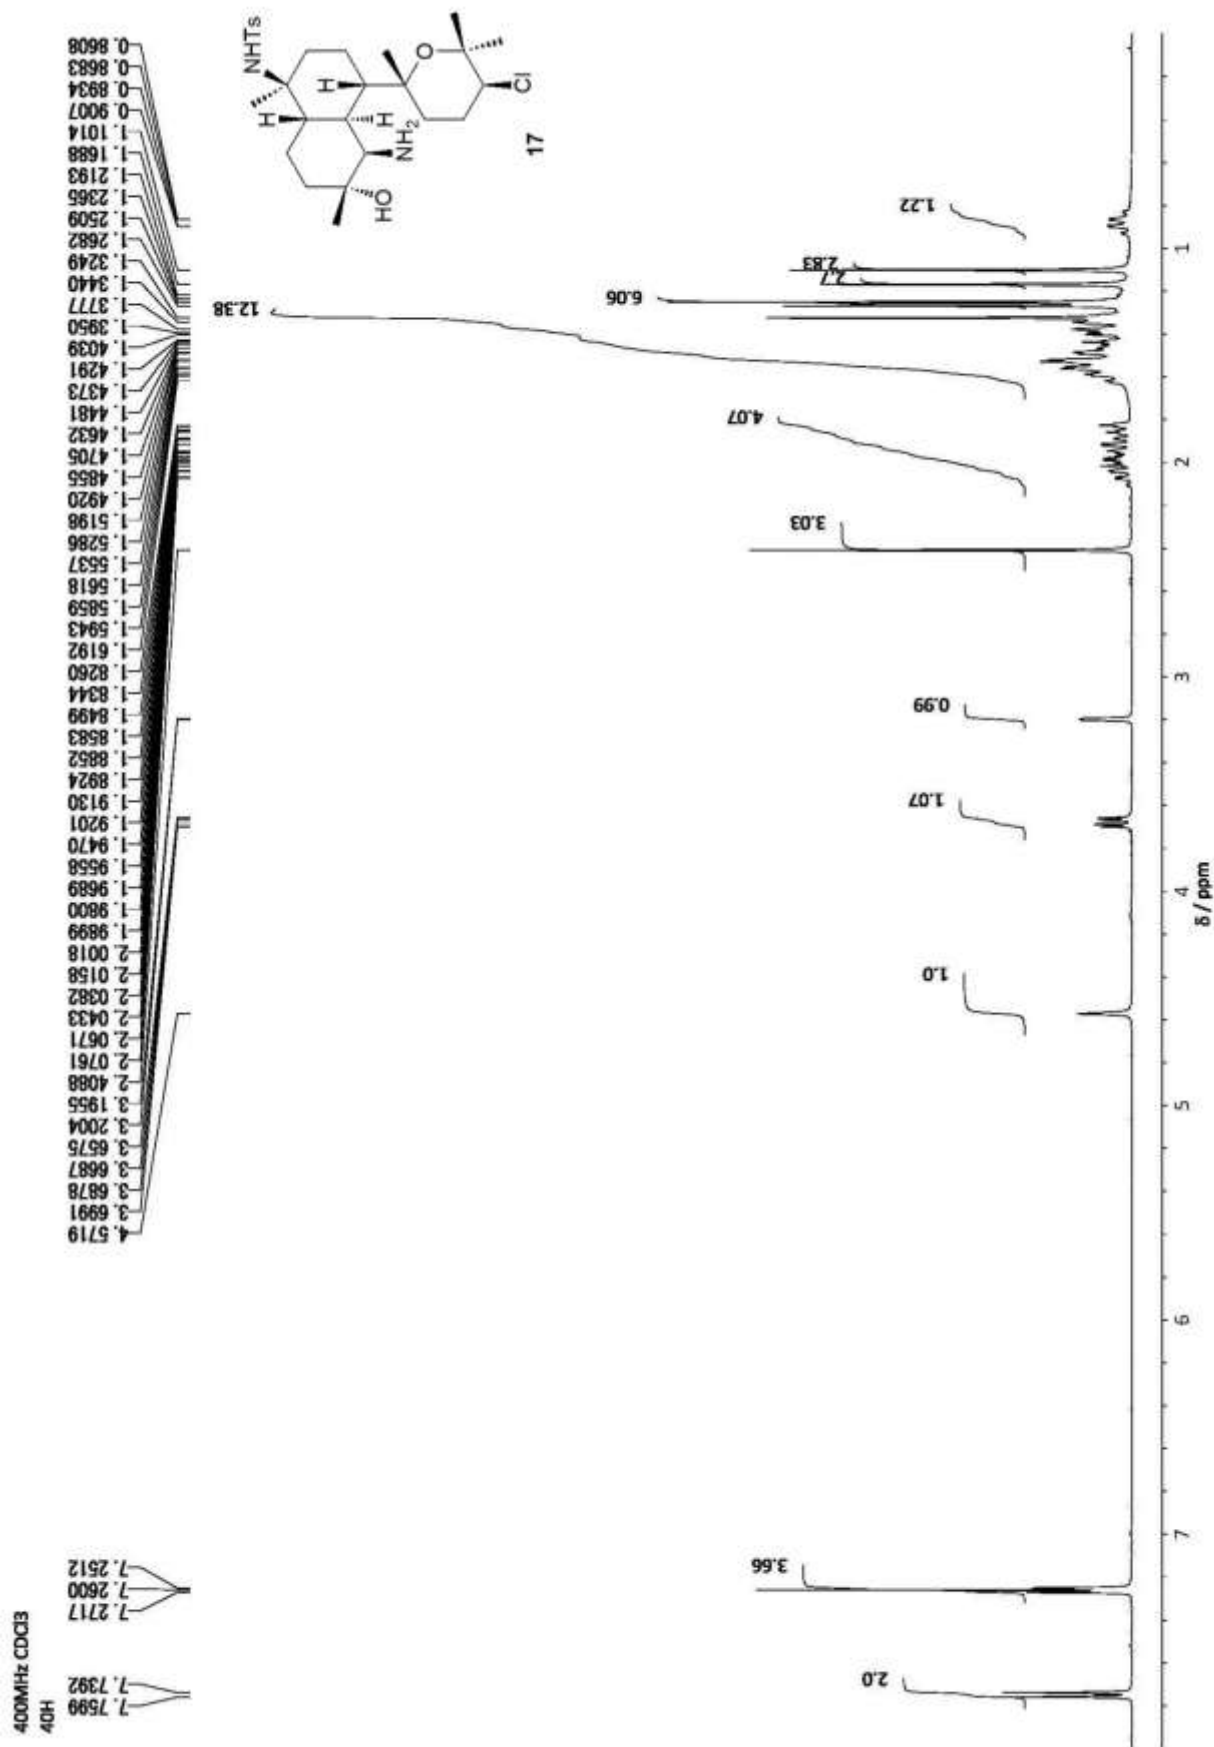

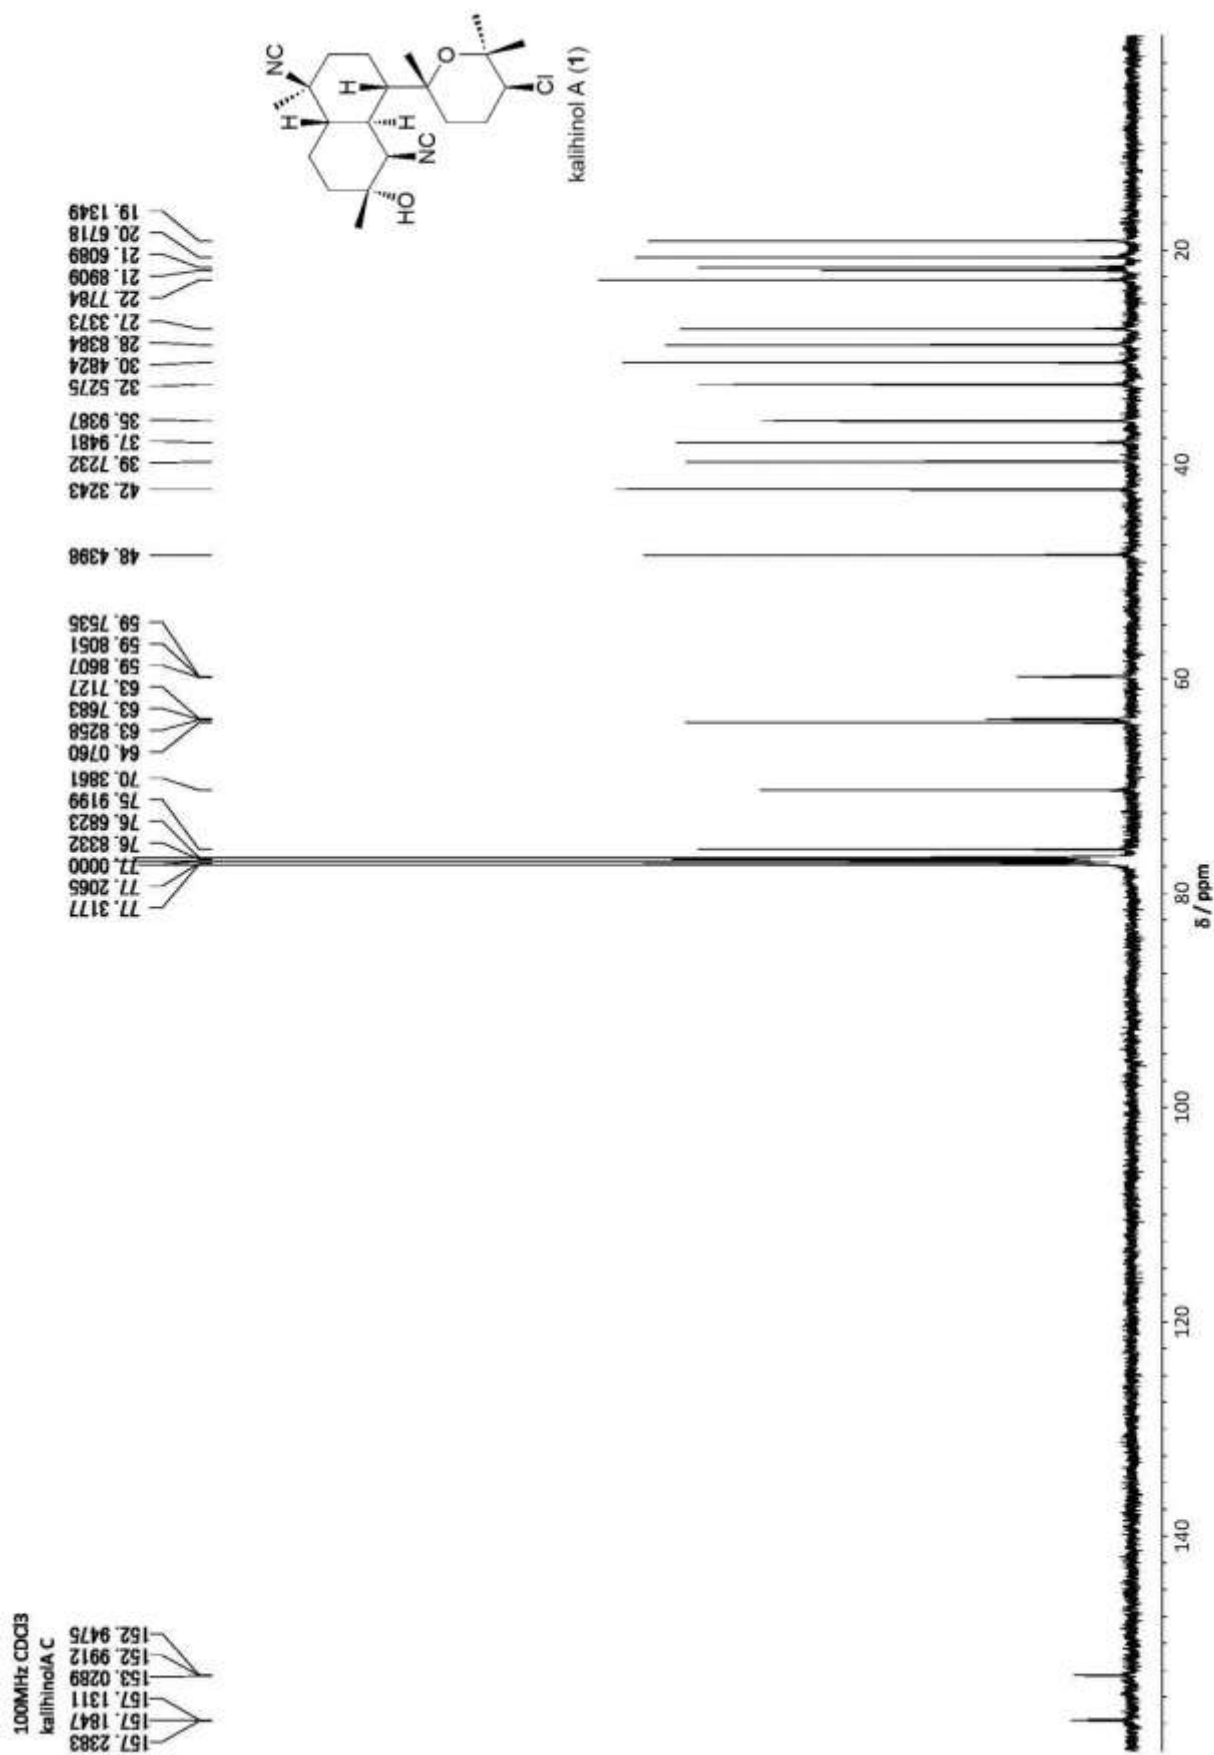

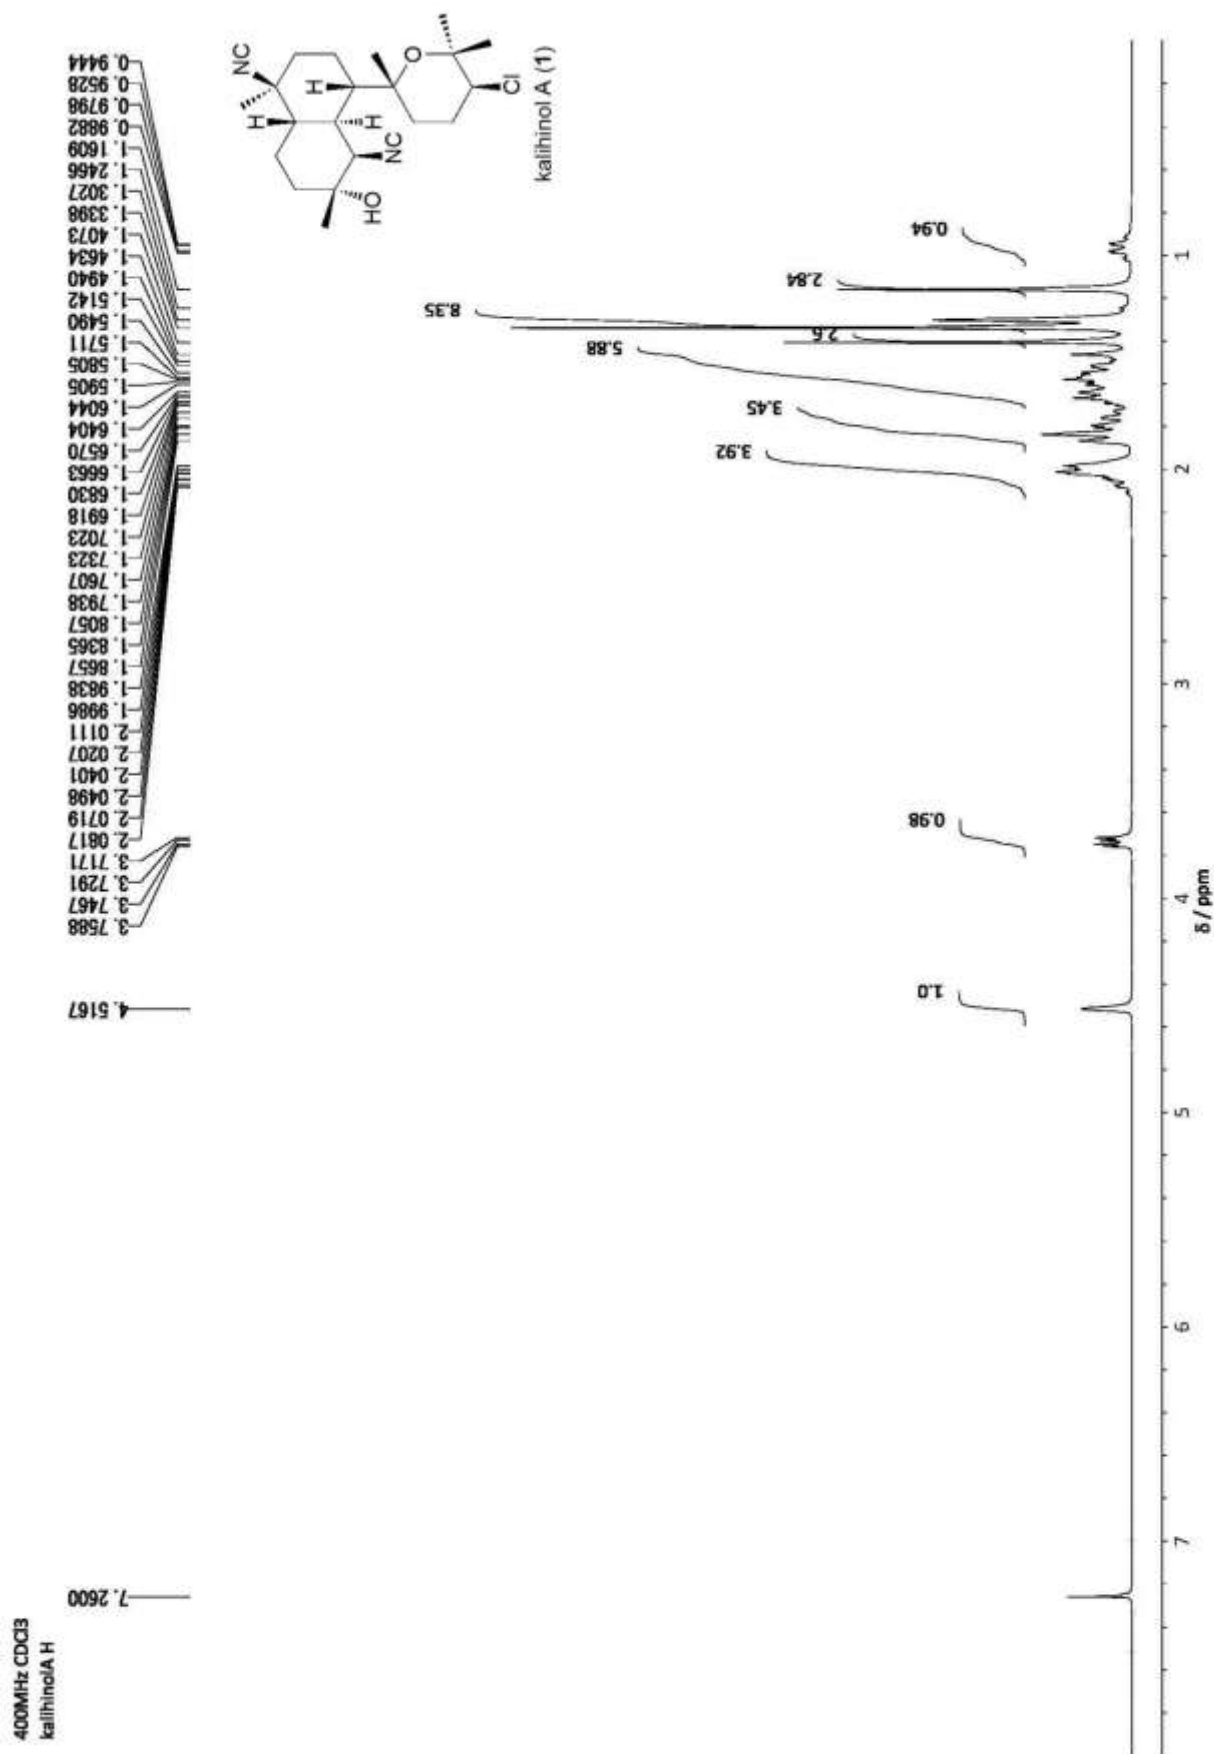

Supplement: c1cc16468f.pdf [file c1cc16468f.pdf]
